# Supplementary material for: Easy conjugations between molecules via copper-catalyzed reactions of ortho-aromatic diamines with ketones
Source: Royal Society of Chemistry journal article supplement (doi:10.1039/c3gc41585f), 2013-01-01

## Supporting Information

### Easy conjugations between molecules via copper-catalyzed reactions of *ortho*-aromatic diamines with ketones

Juyou Lu,<sup>a,b</sup> Haijun Yang,<sup>a</sup> Yunhe Jin,<sup>a</sup> Yuyang Jiang<sup>c</sup> and Hua Fu<sup>a,c\*</sup>

<sup>a</sup> Key Laboratory of Bioorganic Phosphorus Chemistry and Chemical Biology (Ministry of Education), Department of Chemistry, Tsinghua University, Beijing 100084, P. R. China. \*e-mail: fuhua@mail.tsinghua.edu.cn

<sup>b</sup> Xi'an Modern Chemistry Research Institute, Xi'an 710065, P. R. China

<sup>c</sup> Key Laboratory of Chemical Biology (Guangdong Province), Graduate School of Shenzhen, Tsinghua University, Shenzhen 518057, P. R. China

#### Table of contents

|                                                                                                        |     |
|--------------------------------------------------------------------------------------------------------|-----|
| A: General experimental procedures                                                                     | S2  |
| B: General procedure for copper-catalyzed conjugations of <i>ortho</i> -aromatic diamines with ketones | S2  |
| C: Characterization data of compounds <b>3a-h'</b>                                                     | S2  |
| D: References                                                                                          | S12 |
| E: The <sup>1</sup> H and <sup>13</sup> C NMR spectra of compounds <b>3a-h'</b>                        | S13 |

### A: General experimental procedures

Proton and carbon magnetic resonance spectra ( $^1\text{H}$  NMR and  $^{13}\text{C}$  NMR) were recorded using tetramethylsilane (TMS). Chemical shifts ( $\delta$ ) are given in ppm relative to TMS. The residual solvent signals were used as references and the chemical shifts converted to the TMS scale ( $\text{CDCl}_3$ :  $\delta_{\text{H}} = 7.26$  ppm,  $\delta_{\text{C}} = 77.16$  ppm;  $\text{DMSO}-d_6$ :  $\delta_{\text{H}} = 2.50$  ppm,  $\delta_{\text{C}} = 39.52$  ppm;  $\text{CD}_3\text{OD}$ :  $\delta_{\text{H}} = 3.31$  ppm,  $\delta_{\text{C}} = 49.00$  ppm).

### B: General Procedure for Copper-Catalyzed Conjugations of *ortho*-Aromatic

**Diamines with Ketones.** A 25 mL flask was charged with a magnetic stirrer and ethanol (2.0 mL) or water/ethanol (v/v = 10:1) (3.3 mL) (for **3g'** and **3h'**), *o*-aromatic diamine (**1**) (1.0 mmol), ketone (**2**) (1.2 mmol) and  $\text{Cu}(\text{OAc})_2$  (0.05 mmol, 9.1 mg) were added to the flask. The mixture was stirred at room temperature ( $\sim 25$  °C) under air. After the conjugation completed (TLC determination), the resulting solution was concentrated by a rotary evaporator, and the residue was purified by column chromatography on silica gel using an eluent (petroleum ether/ethyl acetate, ethyl acetate/methanol, ethyl acetate/ethanol or diethyl ether) to provide the desired target product (**3a-h'**).

### C: Characterization data of compounds **3a-h'**

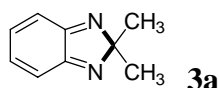

**2,2-Dimethyl-2H-benzo[d]imidazole (3a).**<sup>1</sup> Eluent: diethyl ether. Yield: 133 mg (91%) as a yellow oil.  $^1\text{H}$  NMR (400 MHz,  $\text{CDCl}_3$ , ppm)  $\delta$  7.19 (dd, 2H,  $J = 7.3, 2.7$  Hz), 7.00 (dd, 2H,  $J = 7.3, 2.7$  Hz), 1.54 (s, 6H).  $^{13}\text{C}$  NMR (100 MHz,  $\text{CDCl}_3$ , ppm)  $\delta$  159.5, 134.5, 126.0, 104.4, 21.6. ESI-MS  $[\text{M}+\text{H}]^+$   $m/z$  147.3.

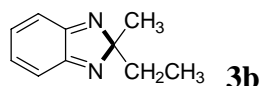

**2-Ethyl-2-methyl-2H-benzo[d]imidazole (3b).**<sup>2</sup> Eluent: diethyl ether. Yield: 152 mg (95%) as a yellow oil.  $^1\text{H}$  NMR (400 MHz,  $\text{CDCl}_3$ , ppm)  $\delta$  7.20 (dd, 2H,  $J = 7.3, 3.2$  Hz), 7.01 (dd, 2H,  $J = 7.3, 3.2$  Hz), 2.07 (q, 2H,  $J = 7.3$  Hz), 1.51 (s, 3H), 0.74 (t, 3H,

$J = 7.3$  Hz).  $^{13}\text{C}$  NMR (100 MHz,  $\text{CDCl}_3$ , ppm)  $\delta$  159.8, 134.4, 125.8, 107.1, 29.3, 19.9, 8.9. ESI-MS  $[\text{M}+\text{H}]^+$   $m/z$  161.5.

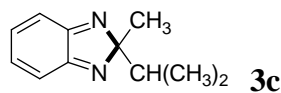

**2-isoPropyl-2-methyl-2H-benzo[d]imidazole (3c).** Eluent: diethyl ether. Yield: 136 mg (78%) as a yellow oil.  $^1\text{H}$  NMR (400 MHz,  $\text{CDCl}_3$ , ppm)  $\delta$  7.20 (dd, 2H,  $J = 7.3$ , 2.7 Hz), 7.00 (dd, 2H,  $J = 7.3$ , 2.7 Hz), 2.30 (m, 1H,  $J = 6.8$  Hz), 1.47 (s, 3H), 0.95 (d, 6H,  $J = 6.8$  Hz).  $^{13}\text{C}$  NMR (100 MHz,  $\text{CDCl}_3$ , ppm)  $\delta$  159.8, 134.4, 125.7, 109.8, 35.0, 18.6, 18.3. HR-MS  $[\text{M}+\text{H}]^+$   $m/z$  calcd for  $\text{C}_{11}\text{H}_{15}\text{N}_2$  175.1235, found 175.1231.

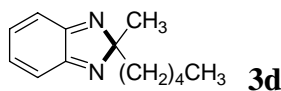

**2-Methyl-2-pentyl-2H-benzo[d]imidazole (3d).** Eluent: diethyl ether. Yield: 188 mg (93%) as a yellow oil.  $^1\text{H}$  NMR (300 MHz,  $\text{CDCl}_3$ , ppm)  $\delta$  7.20 (dd, 2H,  $J = 7.2$ , 2.7 Hz), 7.00 (dd, 2H,  $J = 7.2$ , 2.7 Hz), 2.00-1.97 (m, 2H), 1.51 (s, 3H), 1.26-1.11 (m, 6H), 0.83 (t, 3H,  $J = 6.8$  Hz).  $^{13}\text{C}$  NMR (75 MHz,  $\text{CDCl}_3$ , ppm)  $\delta$  159.7, 134.4, 125.8, 107.1, 36.2, 32.0, 24.1, 22.4, 20.4, 14.0. HR-MS  $[\text{M}+\text{H}]^+$   $m/z$  calcd for  $\text{C}_{13}\text{H}_{19}\text{N}_2$  203.1548, found 203.1543.

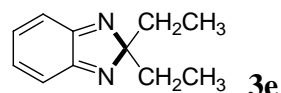

**2,2-Diethyl-2H-benzo[d]imidazole (3e).**<sup>2</sup> Eluent: diethyl ether. Yield: 151 mg (87%) as a brown oil.  $^1\text{H}$  NMR (400 MHz,  $\text{CDCl}_3$ , ppm)  $\delta$  7.20 (dd, 2H,  $J = 7.8$ , 2.7 Hz), 7.01 (dd, 2H,  $J = 7.8$ , 2.7 Hz), 2.12 (q, 4H,  $J = 7.3$  Hz), 0.67 (t, 6H,  $J = 7.3$  Hz).  $^{13}\text{C}$  NMR (100 MHz,  $\text{CDCl}_3$ , ppm)  $\delta$  160.3, 134.4, 125.6, 109.9, 27.8, 8.4. ESI-MS  $[\text{M}+\text{H}]^+$   $m/z$  175.6.

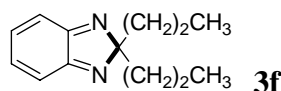

**2,2-Dipropyl-2H-benzo[d]imidazole (3f).** Eluent: ethyl acetate/petroleum ether = 1:30. Yield: 172 mg (85%) as a brown oil.  $^1\text{H}$  NMR (300 MHz,  $\text{CDCl}_3$ , ppm)  $\delta$  7.19 (dd, 2H,  $J = 7.5$ , 3.1 Hz), 7.00 (dd, 2H,  $J = 7.5$ , 3.1 Hz), 2.06-2.01 (m, 4H), 1.07-0.99 (m, 4H), 0.82 (t, 6H,  $J = 7.2$  Hz).  $^{13}\text{C}$  NMR (75 MHz,  $\text{CDCl}_3$ , ppm)  $\delta$  160.1, 134.3,

125.6, 109.7, 37.3, 17.2, 14.3. HR-MS  $[M+H]^+$   $m/z$  calcd for  $C_{13}H_{19}N_2$  203.1548, found 203.1546.

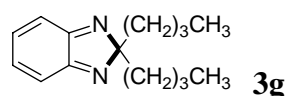

**2,2-Dibutyl-2H-benzo[d]imidazole (3g).** Eluent: ethyl acetate/petroleum ether = 1:20. Yield: 140 mg (61%) as a yellow oil.  $^1H$  NMR (400 MHz,  $CDCl_3$ , ppm)  $\delta$  7.20 (dd, 2H,  $J = 7.3, 2.7$  Hz), 7.00 (dd, 2H,  $J = 7.3, 2.7$  Hz), 2.07-2.02 (m, 4H), 1.26-1.20 (m, 4H), 1.02-0.98 (m, 4H), 0.82 (t, 6H,  $J = 7.3$  Hz).  $^{13}C$  NMR (100 MHz,  $CDCl_3$ , ppm)  $\delta$  160.0, 134.2, 125.5, 109.4, 34.7, 25.9, 22.8, 13.7. HR-MS  $[M+H]^+$   $m/z$  calcd for  $C_{15}H_{23}N_2$  231.1861, found 231.1859.

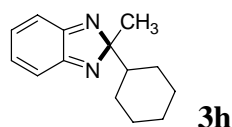

**2-Cyclohexyl-2-methyl-2H-benzo[d]imidazole (3h).** Eluent: ethyl acetate/petroleum ether = 1:20. Yield: 160 mg (75%) as a yellow oil.  $^1H$  NMR (300 MHz,  $CDCl_3$ , ppm)  $\delta$  7.19 (dd, 2H,  $J = 7.5, 3.1$  Hz), 6.99 (dd, 2H,  $J = 7.5, 3.1$  Hz), 1.99 (tt, 1H,  $J = 11.3, 2.7$  Hz), 1.78-1.60 (m, 5H), 1.45 (s, 3H), 1.25-1.01 (m, 5H).  $^{13}C$  NMR (75 MHz,  $CDCl_3$ , ppm)  $\delta$  159.7, 134.3, 125.8, 109.6, 44.8, 28.6, 26.7, 26.2, 18.6. HR-MS  $[M+H]^+$   $m/z$  calcd for  $C_{14}H_{19}N_2$  215.1548, found 215.1542.

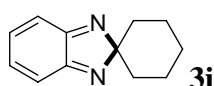

Compound **3i**.<sup>3</sup> Eluent: ethyl acetate/petroleum ether = 1:30. Yield: 165 mg (89%) as a brown oil.  $^1H$  NMR (300 MHz,  $CDCl_3$ , ppm)  $\delta$  7.22 (dd, 2H,  $J = 7.2, 3.1$  Hz), 7.00 (dd, 2H,  $J = 7.2, 3.1$  Hz), 2.20-1.92 (m, 4H), 1.79-1.72 (m, 2H), 1.65-1.64 (m, 4H).  $^{13}C$  NMR (75 MHz,  $CDCl_3$ , ppm)  $\delta$  159.4, 134.2, 126.0, 107.2, 32.6, 25.6, 24.7. ESI-MS  $[M+H]^+$   $m/z$  187.3.

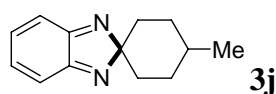

Compound **3j**.<sup>4</sup> Eluent: ethyl acetate/petroleum ether = 1:30. Yield: 180 mg (90%) as a brown oil.  $^1H$  NMR (300 MHz,  $CDCl_3$ , ppm)  $\delta$  7.26-7.18 (m, 2H), 7.01-6.98 (m,

2H), 2.40 (t, 2H,  $J = 12.3$  Hz), 1.92-1.89 (m, 2H), 1.74-1.66 (m, 3H), 1.09 (d, 3H,  $J = 5.5$  Hz), 0.96 (d, 2H,  $J = 12.3$  Hz).  $^{13}\text{C}$  NMR (75 MHz,  $\text{CDCl}_3$ , ppm)  $\delta$  159.8, 159.1, 134.2, 134.1, 126.0, 125.9, 117.0, 33.1, 32.3, 31.9, 21.9. ESI-MS  $[\text{M}+\text{H}]^+$   $m/z$  201.2.

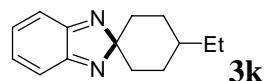

Compound **3k**. Eluent: ethyl acetate/petroleum ether = 1:30. Yield: 193 mg (90%) as a brown oil.  $^1\text{H}$  NMR (300 MHz,  $\text{CDCl}_3$ , ppm)  $\delta$  7.26-7.18 (m, 2H), 7.01-6.98 (m, 2H), 2.38 (td, 2H,  $J = 13.0, 3.4$  Hz), 2.00-1.95 (m, 2H), 1.74-1.60 (m, 2H), 1.52-1.40 (m, 3H), 1.00-0.95 (m, 5H).  $^{13}\text{C}$  NMR (75 MHz,  $\text{CDCl}_3$ , ppm)  $\delta$  159.8, 159.0, 134.2, 134.1, 126.0, 125.9, 107.4, 38.7, 32.3, 30.8, 30.5, 29.2, 11.7. HR-MS  $[\text{M}+\text{H}]^+$   $m/z$  calcd for  $\text{C}_{14}\text{H}_{19}\text{N}_2$  215.1548, found 215.1542.

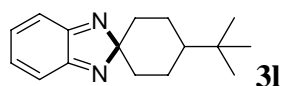

Compound **3l**. Eluent: ethyl acetate/petroleum ether = 1:30. Yield: 225 mg (93%) as a white solid. mp 141-143 °C.  $^1\text{H}$  NMR (300 MHz,  $\text{CDCl}_3$ , ppm)  $\delta$  7.27-7.18 (m, 2H), 6.99 (dd, 2H,  $J = 7.5, 3.1$  Hz), 2.47 (td, 2H,  $J = 13.4, 3.1$  Hz), 1.99-1.95 (m, 2H), 1.76 (qd, 2H,  $J = 12.7, 2.7$  Hz), 1.39-1.26 (m, 2H), 0.97 (s, 9H), 0.92-0.87 (m, 1H).  $^{13}\text{C}$  NMR (75 MHz,  $\text{CDCl}_3$ , ppm)  $\delta$  159.8, 159.0, 134.1, 126.1, 125.9, 107.1, 47.9, 33.1, 32.5, 27.8, 25.8. HR-MS  $[\text{M}+\text{H}]^+$   $m/z$  calcd for  $\text{C}_{16}\text{H}_{23}\text{N}_2$  243.1861, found 243.1863.

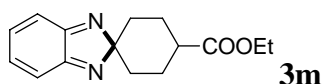

Compound **3m**. Eluent: ethyl acetate/petroleum ether = 1:30. Yield: 235 mg (91%) as a brown oil.  $^1\text{H}$  NMR (300 MHz,  $\text{CDCl}_3$ , ppm)  $\delta$  7.26-7.18 (m, 2H), 7.03 (dd, 2H,  $J = 7.5, 2.7$  Hz), 4.19 (q, 2H,  $J = 7.2$  Hz), 2.70-2.63 (m, 1H), 2.27-2.18 (m, 6H), 1.29 (t, 3H,  $J = 7.2$  Hz), 1.26-1.22 (m, 2H).  $^{13}\text{C}$  NMR (75 MHz,  $\text{CDCl}_3$ , ppm)  $\delta$  175.0, 159.9, 159.4, 134.5, 134.4, 125.9, 125.8, 106.1, 60.3, 42.0, 31.3, 26.9, 14.2. HR-MS  $[\text{M}+\text{H}]^+$   $m/z$  calcd for  $\text{C}_{15}\text{H}_{19}\text{N}_2\text{O}_2$  259.1447, found 259.1441.

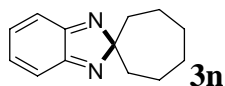

Compound **3n**. Eluent: ethyl acetate/petroleum ether = 1:20. Yield: 176 mg (88%) as a

yellow solid. mp 92-93 °C. <sup>1</sup>H NMR (300 MHz, CDCl<sub>3</sub>, ppm) δ 7.18 (dd, 2H, *J* = 7.5, 3.1 Hz), 6.97 (dd, 2H, *J* = 7.5, 3.1 Hz), 1.98-1.96 (m, 4H), 1.84-1.80 (m, 4H), 1.72-1.69 (m, 4H). <sup>13</sup>C NMR (75 MHz, CDCl<sub>3</sub>, ppm) δ 158.9, 134.2, 126.0, 110.9, 34.0, 29.9, 25.1. HR-MS [M+H]<sup>+</sup> *m/z* calcd for C<sub>13</sub>H<sub>17</sub>N<sub>2</sub> 201.1392, found 201.1389.

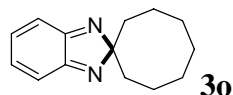

Compound **3o**. Eluent: ethyl acetate/petroleum ether = 1:20. Yield: 156 mg (73%) as a yellow solid. mp 103-105 °C. <sup>1</sup>H NMR (300 MHz, CDCl<sub>3</sub>, ppm) δ 7.20 (dd, 2H, *J* = 7.5, 3.1 Hz), 6.98 (dd, 2H, *J* = 7.5, 3.1 Hz), 1.99-1.98 (m, 4H), 1.84-1.73 (m, 6H), 1.68-1.64 (m, 4H). <sup>13</sup>C NMR (75 MHz, CDCl<sub>3</sub>, ppm) δ 159.2, 134.3, 126.2, 110.8, 30.0, 28.6, 25.1, 25.0. HR-MS [M+H]<sup>+</sup> *m/z* calcd for C<sub>14</sub>H<sub>19</sub>N<sub>2</sub> 215.1548, found 215.1543.

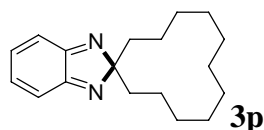

Compound **3p**. Eluent: ethyl acetate/petroleum ether = 1:20. Yield: 189 mg (70%) as a white solid. mp 111-112 °C. <sup>1</sup>H NMR (300 MHz, CDCl<sub>3</sub>, ppm) δ 7.73-7.70 (m, 1H), 7.29-7.24 (m, 1H), 7.20 (dd, 2H, *J* = 6.1, 3.1 Hz), 4.09 (t, 2H, *J* = 7.5 Hz), 2.89 (t, 2H, *J* = 7.5 Hz), 2.00-1.85 (m, 4H), 1.50-1.31 (m, 12H), 1.23-1.20 (m, 2H). <sup>13</sup>C NMR (75 MHz, CDCl<sub>3</sub>, ppm) δ 155.1, 142.8, 135.4, 121.8, 121.6, 119.2, 109.2, 42.5, 26.9, 25.9, 25.8, 25.6, 25.5, 25.2, 25.1, 24.6, 24.5, 23.8. HR-MS [M+H]<sup>+</sup> *m/z* calcd for C<sub>18</sub>H<sub>27</sub>N<sub>2</sub> 271.2174, found 271.2171.

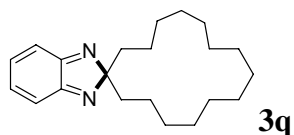

Compound **3q**. Eluent: ethyl acetate/petroleum ether = 1:30. Yield: 178 mg (57%) as a yellow solid. mp 56-58 °C. <sup>1</sup>H NMR (400 MHz, CDCl<sub>3</sub>, ppm) δ 7.20 (dd, 2H, *J* = 7.3, 2.7 Hz), 6.99 (dd, 2H, *J* = 7.3, 2.7 Hz), 1.76-1.73 (m, 4H), 1.59-1.55 (m, 4H), 1.41-1.40 (m, 20H). <sup>13</sup>C NMR (100 MHz, CDCl<sub>3</sub>, ppm) δ 159.4, 134.3, 126.1, 110.3, 32.6, 27.8, 27.1, 26.7, 26.6, 26.4, 24.7. HR-MS [M+H]<sup>+</sup> *m/z* calcd for C<sub>21</sub>H<sub>33</sub>N<sub>2</sub>

313.2644, found 313.2643.

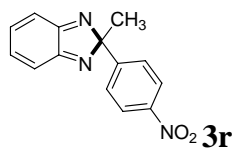

**2-Methyl-2-(4-nitrophenyl)-2H-benzo[d]imidazole (3r).** Eluent: ethyl acetate/petroleum ether = 1:20. Yield: 147 mg (58%) as a yellow solid. mp 168-169 °C.  $^1\text{H}$  NMR (400 MHz,  $\text{CDCl}_3$ , ppm)  $\delta$  8.18 (d, 2H,  $J = 8.7$  Hz), 7.96 (d, 2H,  $J = 9.1$  Hz), 7.25 (dd, 2H,  $J = 7.3, 3.2$  Hz), 7.06 (dd, 2H,  $J = 7.3, 3.2$  Hz), 1.80 (s, 3H).  $^{13}\text{C}$  NMR (100 MHz,  $\text{CDCl}_3$ , ppm)  $\delta$  160.4, 147.4, 146.0, 135.5, 128.7, 125.8, 123.5, 107.4, 25.6. HR-MS  $[\text{M}+\text{H}]^+$   $m/z$  calcd for  $\text{C}_{14}\text{H}_{12}\text{N}_3\text{O}_2$  254.0930, found 254.0925.

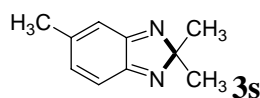

**2,2,5-Trimethyl-2H-benzo[d]imidazole (3s).** Eluent: diethyl ether. Yield: 149 mg (93%) as a brown oil.  $^1\text{H}$  NMR (400 MHz,  $\text{CDCl}_3$ , ppm)  $\delta$  7.12 (d, 1H,  $J = 9.6$  Hz), 6.92 (s, 1H), 6.85 (d, 1H,  $J = 9.1$  Hz), 2.23 (s, 3H), 1.52 (s, 6H).  $^{13}\text{C}$  NMR (100 MHz,  $\text{CDCl}_3$ , ppm)  $\delta$  159.6, 158.7, 144.9, 138.7, 124.9, 122.2, 104.4, 22.7, 21.9. HR-MS  $[\text{M}+\text{H}]^+$   $m/z$  calcd for  $\text{C}_{10}\text{H}_{13}\text{N}_2$  161.1079, found 161.1072.

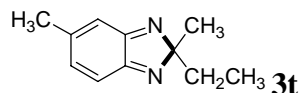

**2-Ethyl-2,5-dimethyl-2H-benzo[d]imidazole (3t).** Eluent: diethyl ether. Yield: 165 mg (95%) as a brown oil.  $^1\text{H}$  NMR (300 MHz,  $\text{CDCl}_3$ , ppm)  $\delta$  7.12 (d, 1H,  $J = 9.6$  Hz), 6.94 - 6.92 (m, 1H), 6.85 (dd, 1H,  $J = 9.6, 1.3$  Hz), 2.24 (d, 3H,  $J = 1.3$  Hz), 2.05 (q, 2H,  $J = 7.5$  Hz), 1.50 (s, 3H), 0.71 (t, 3H,  $J = 7.5$  Hz).  $^{13}\text{C}$  NMR (75 MHz,  $\text{CDCl}_3$ , ppm)  $\delta$  160.1, 159.2, 144.9, 138.7, 124.8, 122.1, 107.1, 29.6, 22.7, 20.4, 8.8. HR-MS  $[\text{M}+\text{H}]^+$   $m/z$  calcd for  $\text{C}_{11}\text{H}_{15}\text{N}_2$  175.1235, found 175.1228.

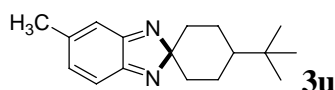

Compound **3u**. Eluent: diethyl ether. Yield: 233 mg (91%) as a brown solid. mp 77-78 °C.  $^1\text{H}$  NMR (400 MHz,  $\text{CDCl}_3$ , ppm)  $\delta$  7.15 (dd, 1H,  $J = 25.1, 9.6$  Hz), 6.96 (dd, 2H,  $J = 28.8, 1.3$  Hz), 6.84 (dt, 1H,  $J = 9.6, 1.8$  Hz), 2.43 (td, 2H,  $J = 13.2, 3.2$  Hz), 2.22

(s, 3H), 1.82 (dd, 2H,  $J = 12.8, 1.8$  Hz), 1.61 (qd, 2H,  $J = 13.2, 1.3$  Hz), 1.20 (tt, 1H,  $J = 12.3, 2.7$  Hz), 0.83 (s, 9H), 0.81-0.78 (m, 2H).  $^{13}\text{C}$  NMR (75 MHz,  $\text{CDCl}_3$ , ppm)  $\delta$  160.0, 159.2, 159.1, 158.3, 144.5, 138.3, 125.1, 124.9, 122.5, 122.2, 107.1, 47.9, 41.3, 33.4, 32.5, 27.8, 27.6, 25.8, 22.7, 22.6. HR-MS  $[\text{M}+\text{H}]^+$   $m/z$  calcd for  $\text{C}_{17}\text{H}_{25}\text{N}_2$  257.2018, found 257.2016.

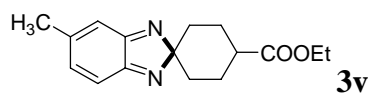

Compound **3v**. Eluent: diethyl ether. Yield: 245 mg (90%) as a brown oil.  $^1\text{H}$  NMR (400 MHz,  $\text{CDCl}_3$ , ppm)  $\delta$  7.18-7.12 (m, 1H), 6.95 (d, 1H,  $J = 14.2$  Hz), 6.88 (d, 1H,  $J = 9.6$  Hz), 4.19 (q, 2H,  $J = 6.8$  Hz), 2.68-2.65 (m, 1H), 2.25 (s, 3H), 2.22-2.17 (m, 6H), 1.29 (t, 3H,  $J = 7.3$  Hz), 1.26-1.22 (m, 2H).  $^{13}\text{C}$  NMR (75 MHz,  $\text{CDCl}_3$ , ppm)  $\delta$  175.0, 160.0, 159.6, 159.2, 158.7, 145.0, 144.9, 138.6, 125.0, 124.8, 122.3, 122.1, 106.0, 60.2, 42.0, 41.9, 31.6, 31.5, 27.0, 26.9, 25.2, 23.1, 22.7, 22.6, 14.2. HR-MS  $[\text{M}+\text{H}]^+$   $m/z$  calcd for  $\text{C}_{16}\text{H}_{21}\text{N}_2\text{O}_2$  273.1603, found 273.1596.

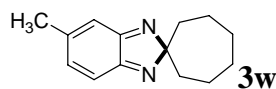

Compound **3w**. Eluent: diethyl ether. Yield: 190 mg (89%) as a yellow solid. mp 96-98 °C.  $^1\text{H}$  NMR (400 MHz,  $\text{CDCl}_3$ , ppm)  $\delta$  7.11 (d, 1H,  $J = 9.1$  Hz), 6.91 (s, 1H), 6.82 (d, 1H,  $J = 9.1$  Hz), 2.22 (s, 3H), 1.96-1.95 (m, 4H), 1.82-1.81 (m, 4H), 1.71-1.70 (m, 4H).  $^{13}\text{C}$  NMR (100 MHz,  $\text{CDCl}_3$ , ppm)  $\delta$  159.2, 158.3, 144.7, 138.5, 125.1, 122.3, 110.9, 34.3, 30.0, 25.1, 22.7. HR-MS  $[\text{M}+\text{H}]^+$   $m/z$  calcd for  $\text{C}_{14}\text{H}_{19}\text{N}_2$  215.1548, found 215.1546.

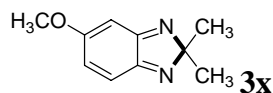

**5-Methoxy-2,2-dimethyl-2H-benzimidazole (3x)**. Eluent: diethyl ether. Yield: 167 mg (95%) as a yellow solid. mp 83-85 °C.  $^1\text{H}$  NMR (400 MHz,  $\text{CDCl}_3$ , ppm)  $\delta$  7.14 (d, 1H,  $J = 10.0$  Hz), 6.78 (dd, 1H,  $J = 10.0, 2.2$  Hz), 6.26 (d, 1H,  $J = 1.8$  Hz), 3.83 (s, 3H), 1.52 (s, 6H).  $^{13}\text{C}$  NMR (100 MHz,  $\text{CDCl}_3$ , ppm)  $\delta$  163.5, 159.6, 158.1, 134.3, 126.1, 104.7, 96.3, 55.8, 22.3. HR-MS  $[\text{M}+\text{H}]^+$   $m/z$  calcd for  $\text{C}_{10}\text{H}_{13}\text{N}_2\text{O}$  177.1028, found 177.1021.



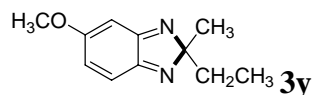

**2-Ethyl-5-methoxy-2-methyl-2H-benzo[d]imidazole (3y).** Eluent: diethyl ether. Yield: 182 mg (96%) as a yellow solid. mp 93-94 °C. <sup>1</sup>H NMR (400 MHz, CDCl<sub>3</sub>, ppm) δ 7.02 (d, 1H, *J* = 9.6 Hz), 6.66 (dd, 1H, *J* = 9.6, 1.3 Hz), 6.15 (s, 1H), 3.71 (s, 3H), 1.91 (q, 2H, *J* = 7.3 Hz), 1.37 (s, 3H), 0.61 (t, 3H, *J* = 7.3 Hz). <sup>13</sup>C NMR (100 MHz, CDCl<sub>3</sub>, ppm) δ 163.5, 160.0, 158.5, 134.2, 125.9, 107.4, 96.3, 55.7, 29.8, 20.7, 8.8. HR-MS [M+H]<sup>+</sup> *m/z* calcd for C<sub>11</sub>H<sub>15</sub>N<sub>2</sub>O 191.1184, found 191.1179.

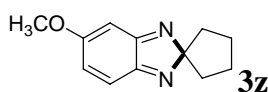

Compound **3z**. Eluent: diethyl ether. Yield: 145 mg (72%) as a yellow solid. mp 83-85 °C. <sup>1</sup>H NMR (300 MHz, CDCl<sub>3</sub>, ppm) δ 7.16 (d, 1H, *J* = 9.6 Hz), 6.78 (dd, 1H, *J* = 10.0, 2.2 Hz), 6.30 (d, 1H, *J* = 2.2 Hz), 3.82 (s, 3H), 2.23-2.20 (m, 4H), 2.03-2.00 (m, 4H). <sup>13</sup>C NMR (75 MHz, CDCl<sub>3</sub>, ppm) δ 163.4, 159.6, 158.1, 133.9, 125.8, 114.7, 96.2, 55.7, 33.7, 26.1. HR-MS [M+H]<sup>+</sup> *m/z* calcd for C<sub>12</sub>H<sub>15</sub>N<sub>2</sub>O 203.1184, found 203.1178.

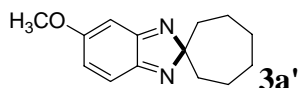

Compound **3a'**. Eluent: ethyl acetate/petroleum ether = 1:20. Yield: 212 mg (92%) as a yellow solid. mp 101-103 °C. <sup>1</sup>H NMR (400 MHz, CDCl<sub>3</sub>, ppm) δ 7.13 (d, 1H, *J* = 9.9 Hz), 6.75 (dd, 1H, *J* = 9.6, 2.0 Hz), 6.27 (d, 1H, *J* = 2.0 Hz), 3.81 (s, 3H), 1.95-1.91 (m, 4H), 1.82-1.77 (m, 4H), 1.74-1.68 (m, 4H). <sup>13</sup>C NMR (100 MHz, CDCl<sub>3</sub>, ppm) δ 163.4, 159.2, 157.6, 134.1, 126.2, 111.2, 96.5, 55.7, 34.8, 29.9, 25.0. HR-MS [M+H]<sup>+</sup> *m/z* calcd for C<sub>14</sub>H<sub>19</sub>N<sub>2</sub>O 231.1497, found 231.1492.

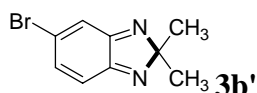

**5-Bromo-2,2-dimethyl-2H-benzo[d]imidazole (3b').** Eluent: diethyl ether. Yield: 162 mg (72%) as a brown oil. <sup>1</sup>H NMR (400 MHz, CDCl<sub>3</sub>, ppm) δ 7.51 (s, 1H), 7.14-7.05 (m, 2H), 1.54 (s, 6H). <sup>13</sup>C NMR (100 MHz, CDCl<sub>3</sub>, ppm) δ 158.9, 157.4, 138.9, 130.3, 127.5, 126.6, 105.6, 21.5. HR-MS [M+H]<sup>+</sup> *m/z* calcd for C<sub>9</sub>H<sub>10</sub>BrN<sub>2</sub>

225.0027, found 225.0023.

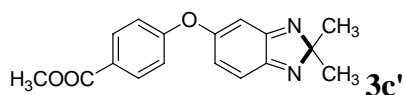

**Methyl 4-(2,2-dimethyl-2H-benzo[d]imidazol-5-yloxy)benzoate (3c').** Eluent: diethyl ether. Yield: 266 mg (90%) as a brown oil.  $^1\text{H}$  NMR (400 MHz,  $\text{CDCl}_3$ , ppm)  $\delta$  8.08 (d, 2H,  $J = 8.7$  Hz), 7.25-7.23 (m, 1H), 7.15 (d, 2H,  $J = 8.7$  Hz), 6.94 (dd, 1H,  $J = 9.6, 2.2$  Hz), 6.25 (d, 1H,  $J = 2.2$  Hz), 3.90 (s, 3H), 1.48 (s, 6H).  $^{13}\text{C}$  NMR (100 MHz,  $\text{CDCl}_3$ , ppm)  $\delta$  166.1, 161.6, 159.1, 158.0, 157.5, 133.1, 131.9, 127.4, 127.3, 120.4, 105.5, 103.8, 52.3, 22.1. HR-MS  $[\text{M}+\text{H}]^+$   $m/z$  calcd for  $\text{C}_{17}\text{H}_{17}\text{N}_2\text{O}_3$  297.1239, found 297.1238.

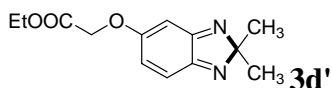

**Ethyl 2-(2,2-dimethyl-2H-benzo[d]imidazol-5-yloxy)acetate (3d').** Eluent: diethyl ether. Yield: 223 mg (90%) as a brown oil.  $^1\text{H}$  NMR (400 MHz,  $\text{CDCl}_3$ , ppm)  $\delta$  7.05 (d, 1H,  $J = 9.6$  Hz), 6.77 (dd, 1H,  $J = 10.0, 2.2$  Hz), 6.05 (d, 1H,  $J = 1.8$  Hz), 4.49 (s, 2H), 4.16 (q, 2H,  $J = 7.3$  Hz), 1.38 (s, 6H), 1.19 (t, 3H,  $J = 7.3$  Hz).  $^{13}\text{C}$  NMR (100 MHz,  $\text{CDCl}_3$ , ppm)  $\delta$  167.1, 161.6, 159.1, 157.9, 133.8, 126.5, 105.0, 97.7, 65.1, 61.7, 22.1, 14.1. HR-MS  $[\text{M}+\text{H}]^+$   $m/z$  calcd for  $\text{C}_{13}\text{H}_{17}\text{N}_2\text{O}_3$  249.1239, found 249.1233.

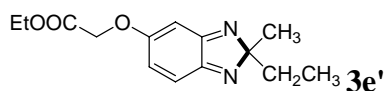

**Ethyl 2-(2-ethyl-2-methyl-2H-benzo[d]imidazol-5-yloxy)acetate (3e').** Eluent: diethyl ether. Yield: 231 mg (88%) as a brown oil.  $^1\text{H}$  NMR (400 MHz,  $\text{CDCl}_3$ , ppm)  $\delta$  7.19 (d, 1H,  $J = 9.6$  Hz), 6.90 (dd, 1H,  $J = 9.6, 2.2$  Hz), 6.19 (d, 1H,  $J = 1.8$  Hz), 4.62 (s, 2H), 4.29 (q, 2H,  $J = 7.3$  Hz), 2.01 (q, 2H,  $J = 7.3$  Hz), 1.48 (s, 3H), 1.32 (t, 3H,  $J = 7.3$  Hz), 0.74 (t, 3H,  $J = 7.3$  Hz).  $^{13}\text{C}$  NMR (100 MHz,  $\text{CDCl}_3$ , ppm)  $\delta$  167.1, 161.7, 159.6, 158.3, 133.7, 126.4, 107.8, 97.7, 65.1, 61.7, 29.7, 20.5, 14.1, 8.9. HR-MS  $[\text{M}+\text{H}]^+$   $m/z$  calcd for  $\text{C}_{14}\text{H}_{19}\text{N}_2\text{O}_3$  263.1396, found 263.1392.

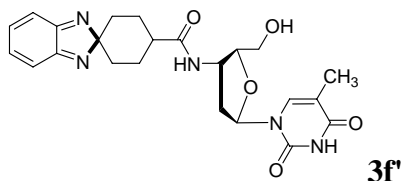

Compound **3f'**. Eluent: ethyl acetate/ methanol = 15:1. Yield: 335 mg (74%) as a brown solid. mp 88-90 °C. <sup>1</sup>H NMR (400 MHz, CD<sub>3</sub>OD, ppm) δ 7.88 (s, 1H), 7.20-7.12 (m, 4H), 6.23 (t, 1H, *J* = 5.9 Hz), 4.51-4.49 (m, 1H), 3.88-3.70 (m, 3H), 2.53-2.50 (m, 1H), 2.36-2.25 (m, 4H), 2.20-2.11 (m, 2H), 2.03-2.00 (m, 2H), 1.84 (s, 3H), 1.02 (d, 2H, *J* = 12.3 Hz). <sup>13</sup>C NMR (100 MHz, CD<sub>3</sub>OD, ppm) δ 177.0, 165.0, 160.3, 159.4, 151.0, 136.8, 135.9, 135.4, 125.0, 124.5, 110.1, 105.4, 85.4, 84.5, 61.2, 48.9, 43.5, 37.4, 31.5, 27.5, 27.3, 11.2. HR-MS [*M*+*H*]<sup>+</sup> *m/z* calcd for C<sub>23</sub>H<sub>28</sub>N<sub>5</sub>O<sub>5</sub> 454.2090, found 454.2080.

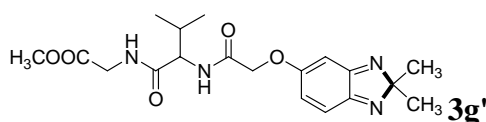

**Methyl 2-(2-(2-(2,2-dimethyl-2H-benzo[d]imidazol-6-yloxy)acetamido)-3-methylbutanamido)acetate (3g')**. Eluent: ethyl acetate/ ethanol = 30:1. Yield: 312 mg (80%) as a brown oil. <sup>1</sup>H NMR (400 MHz, DMSO-*d*<sub>6</sub>, ppm) δ 8.49 (t, 1H, *J* = 5.5 Hz), 8.09 (d, 1H, *J* = 8.7 Hz), 7.19 (d, 1H, *J* = 9.6 Hz), 6.93 (d, 1H, *J* = 9.6 Hz), 6.26 (s, 1H), 4.67-4.53 (m, 2H), 4.24 (t, 1H, *J* = 7.3 Hz), 3.81 (qd, 2H, *J* = 17.4, 5.5 Hz), 3.58 (s, 3H), 2.00-1.97 (m, 1H), 1.31 (s, 6H), 0.86-0.81 (m, 6H). <sup>13</sup>C NMR (100 MHz, DMSO-*d*<sub>6</sub>, ppm) δ 171.7, 170.6, 166.8, 161.9, 159.3, 157.9, 134.6, 126.7, 105.1, 98.2, 67.3, 57.8, 52.1, 41.0, 31.1, 22.6, 19.5, 18.4. HR-MS [*M*+*H*]<sup>+</sup> *m/z* calcd for C<sub>19</sub>H<sub>27</sub>N<sub>4</sub>O<sub>5</sub> 391.1981, found 391.1977.

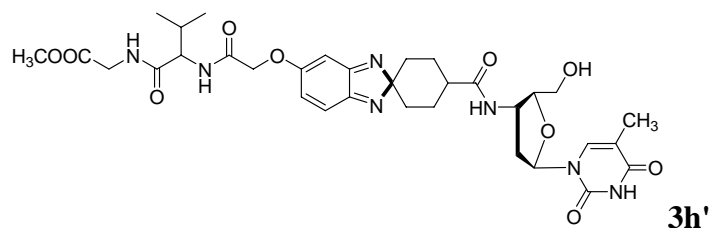

Compound **3h'**. Eluent: ethyl acetate/ ethanol = 10:1. Yield: 474 mg (68%) as a brown solid. mp 96-98 °C. <sup>1</sup>H NMR (400 MHz, DMSO-*d*<sub>6</sub>, ppm) δ 11.20 (s, 1H), 8.45 (t, 1H, *J* = 4.5 Hz), 8.21 (d, 1H, *J* = 6.8 Hz), 8.06 (d, 1H, *J* = 8.7 Hz), 7.71 (s, 1H), 7.16 (d,

1H,  $J = 9.6$  Hz), 6.91 (d, 1H,  $J = 9.6$  Hz), 6.28 (s, 1H), 6.13 (t, 1H,  $J = 5.9$  Hz), 5.00 (s, 1H), 4.63-4.49 (m, 2H), 4.28 (s, 1H), 4.19 (t, 1H,  $J = 7.7$  Hz), 3.84-3.70 (m, 3H), 3.58-3.48 (m, 5H), 3.28 (s, 1H), 2.45-2.35 (m, 3H), 2.16-1.79 (m, 8H), 1.70 (s, 3H), 0.85-0.77 (m, 6H).  $^{13}\text{C}$  NMR (100 MHz, DMSO- $d_6$ , ppm)  $\delta$  175.4, 171.7, 170.6, 166.8, 164.2, 161.9, 159.9, 157.8, 150.9, 136.7, 134.6, 126.6, 109.9, 106.8, 98.5, 85.8, 84.0, 67.3, 61.9, 57.8, 49.4, 43.3, 41.0, 37.5, 32.3, 31.1, 27.9, 27.8, 25.6, 19.5, 18.5, 12.7. HR-MS  $[\text{M}+\text{H}]^+$   $m/z$  calcd for  $\text{C}_{33}\text{H}_{44}\text{N}_7\text{O}_{10}$  698.3150, found 698.3143.

#### D: References

- 1 S. Hati, G. K. Patra, J. P. Naskar, M. G. B. Drew, D. Datta, *New J. Chem.*, 2001, **25**, 218.
- 2 G. K. Patra, I. Goldberg, M. G. B. Drew, S. De, J. P. Naskar, D. Datta, *Indian J. Chem. A.*, 2007, **11**, 1758.
- 3 J. C. Hazelton, B. Iddon, H. Suschitzky, L. H. Woolley, *J. Chem. Soc. Perkin Trans. I*, 1992, 685.
- 4 J. A. L. Herbert, B. Iddon, A. G. Robinson, H. Suschitzky, *J. Chem. Soc. Perkin Trans. I*, 1988, 991.

### E: The $^1\text{H}$ NMR and $^{13}\text{C}$ NMR spectra of compounds 3a-h'

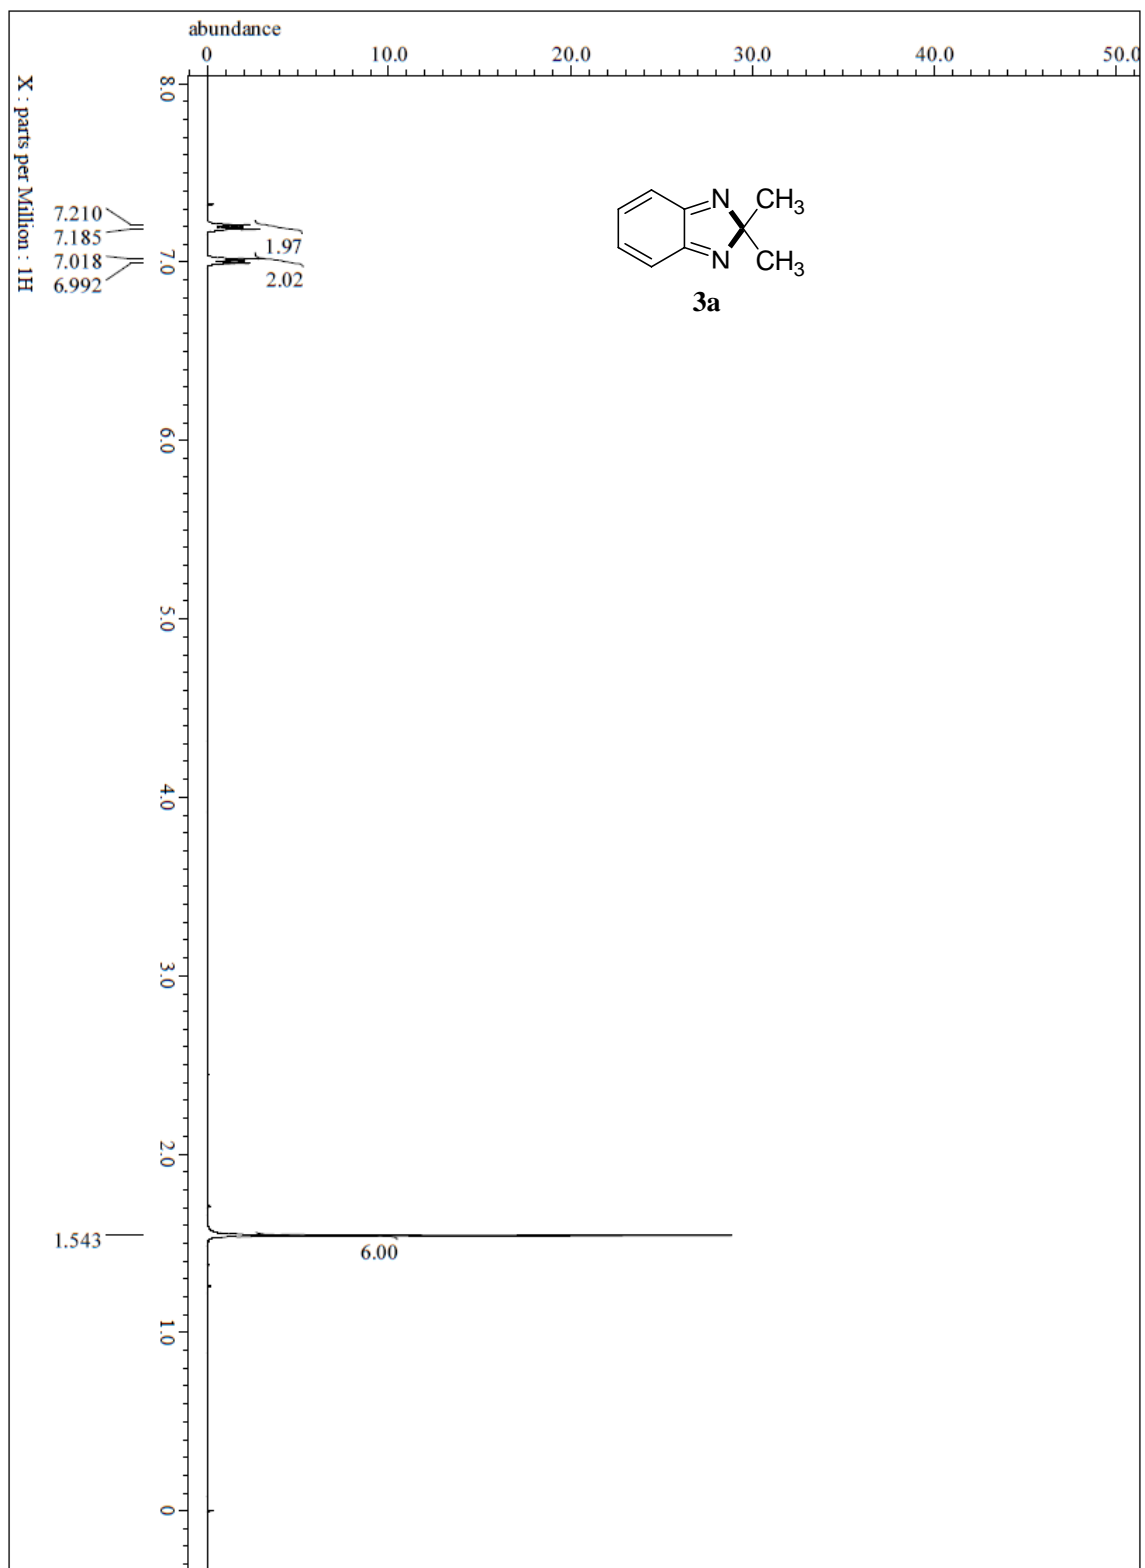

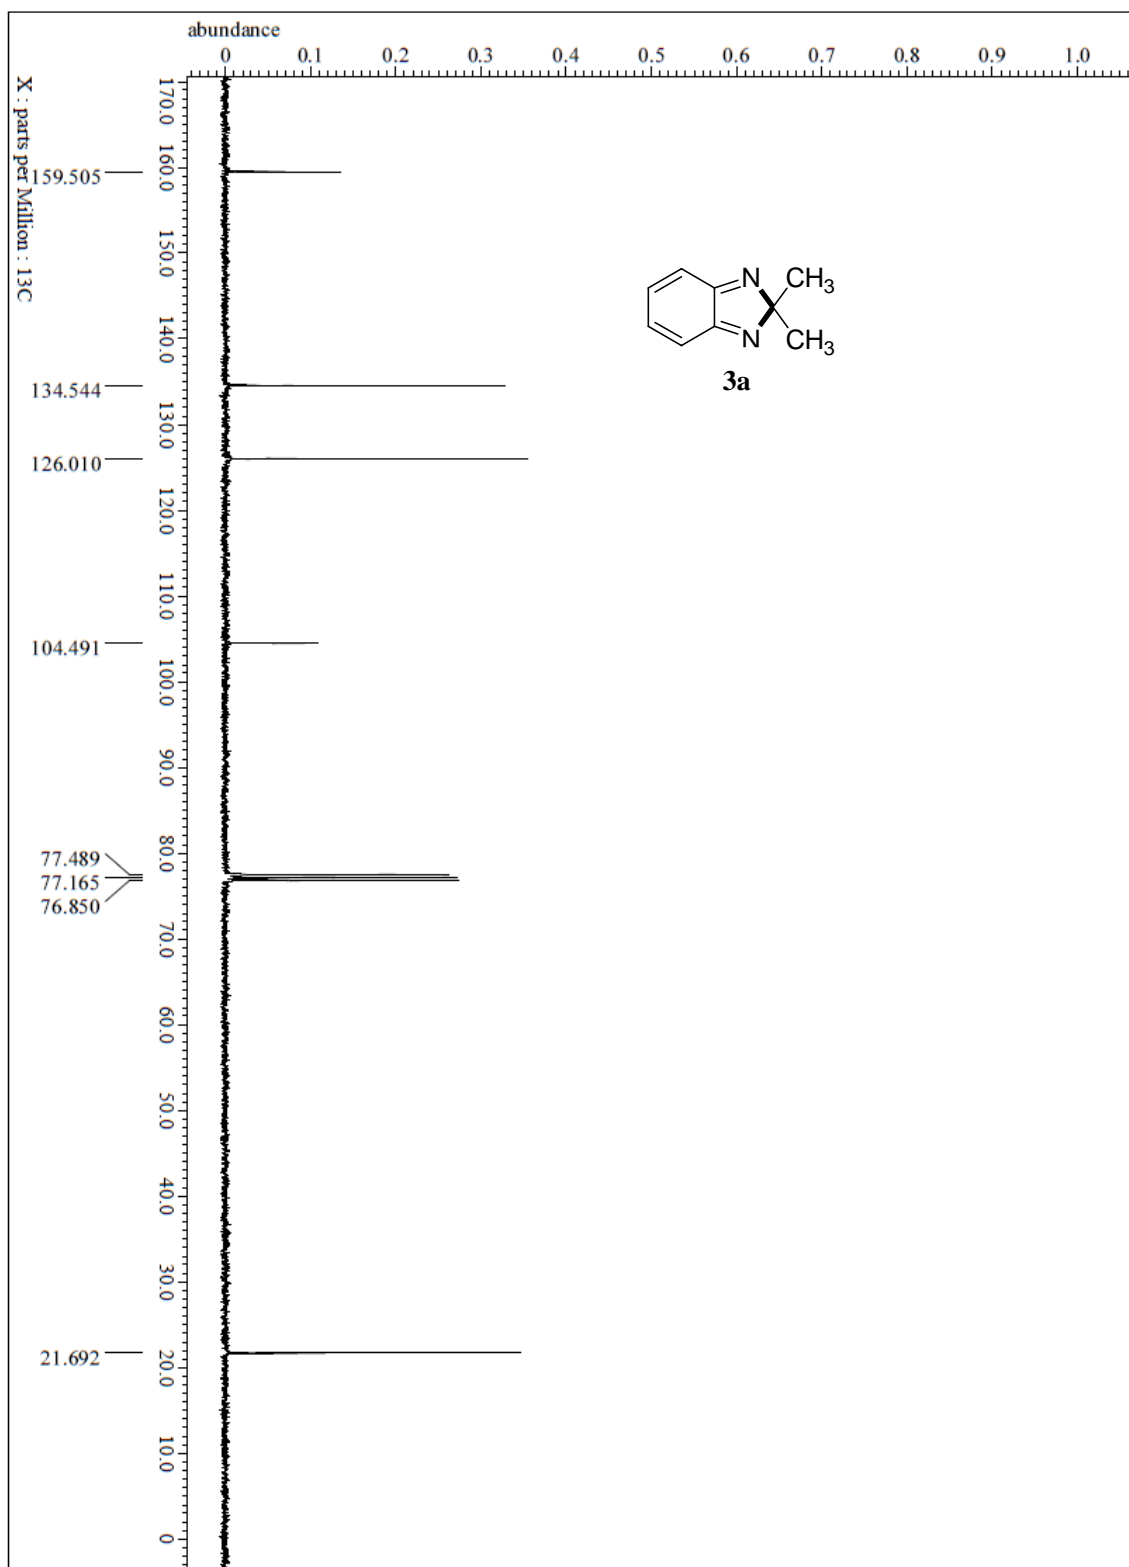

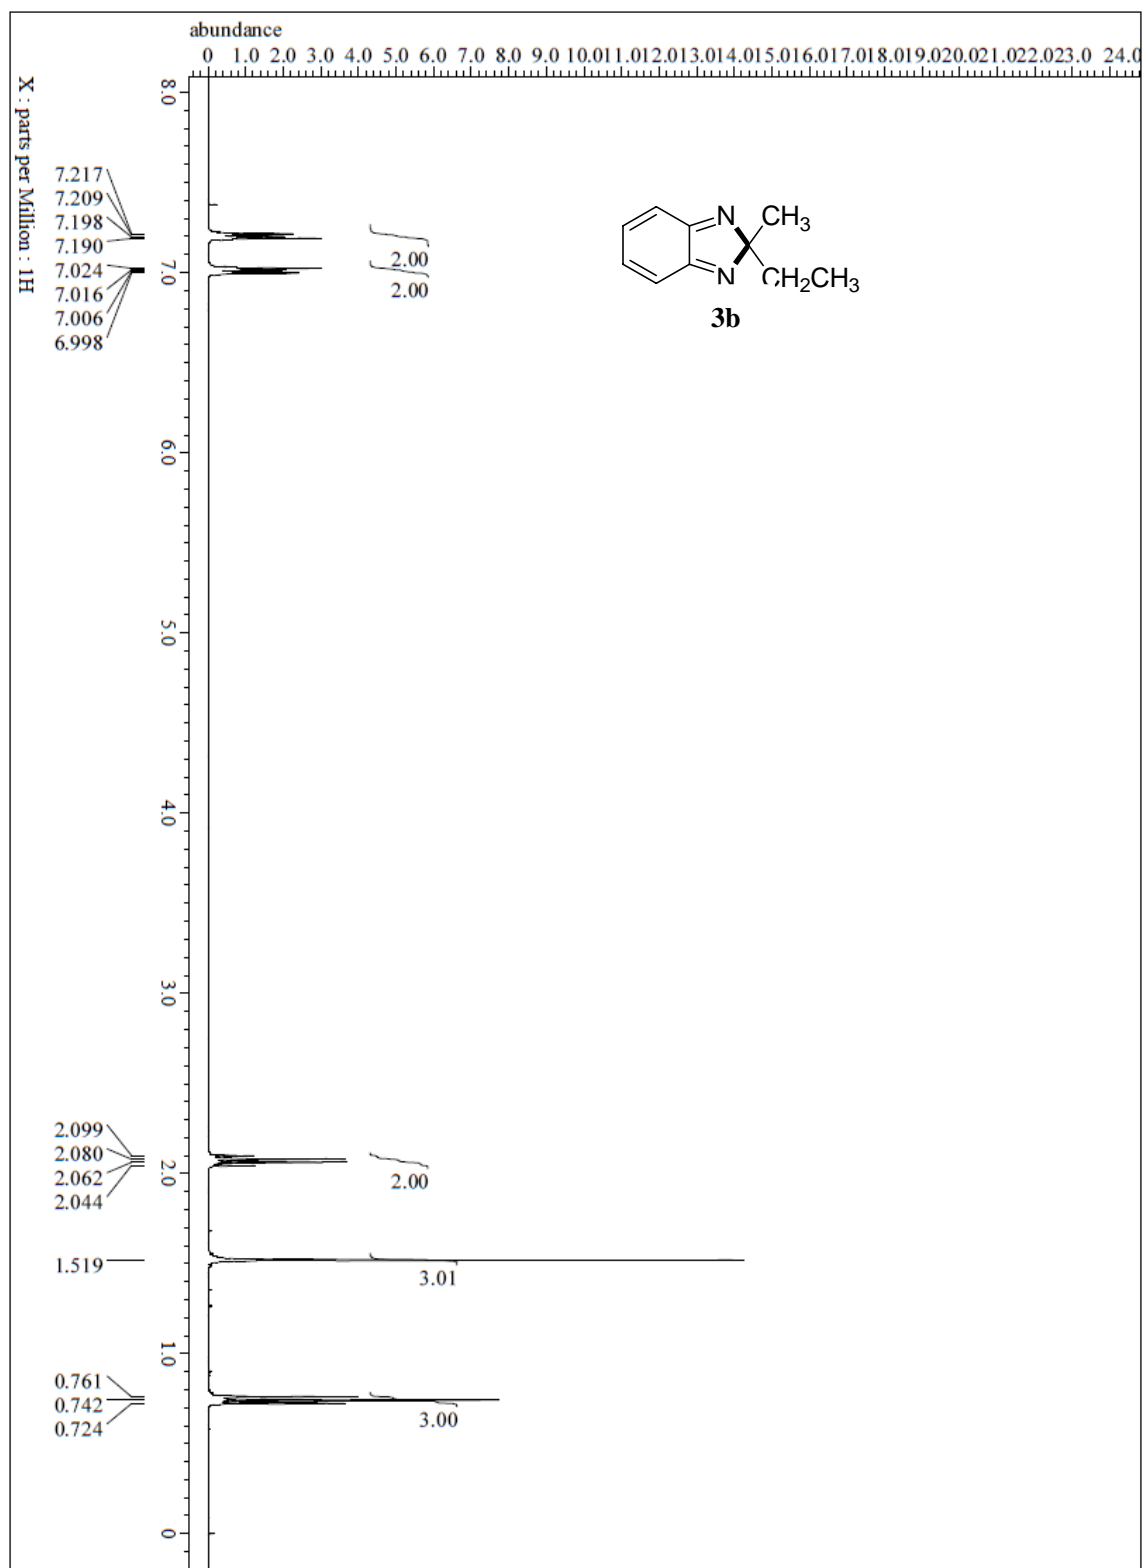

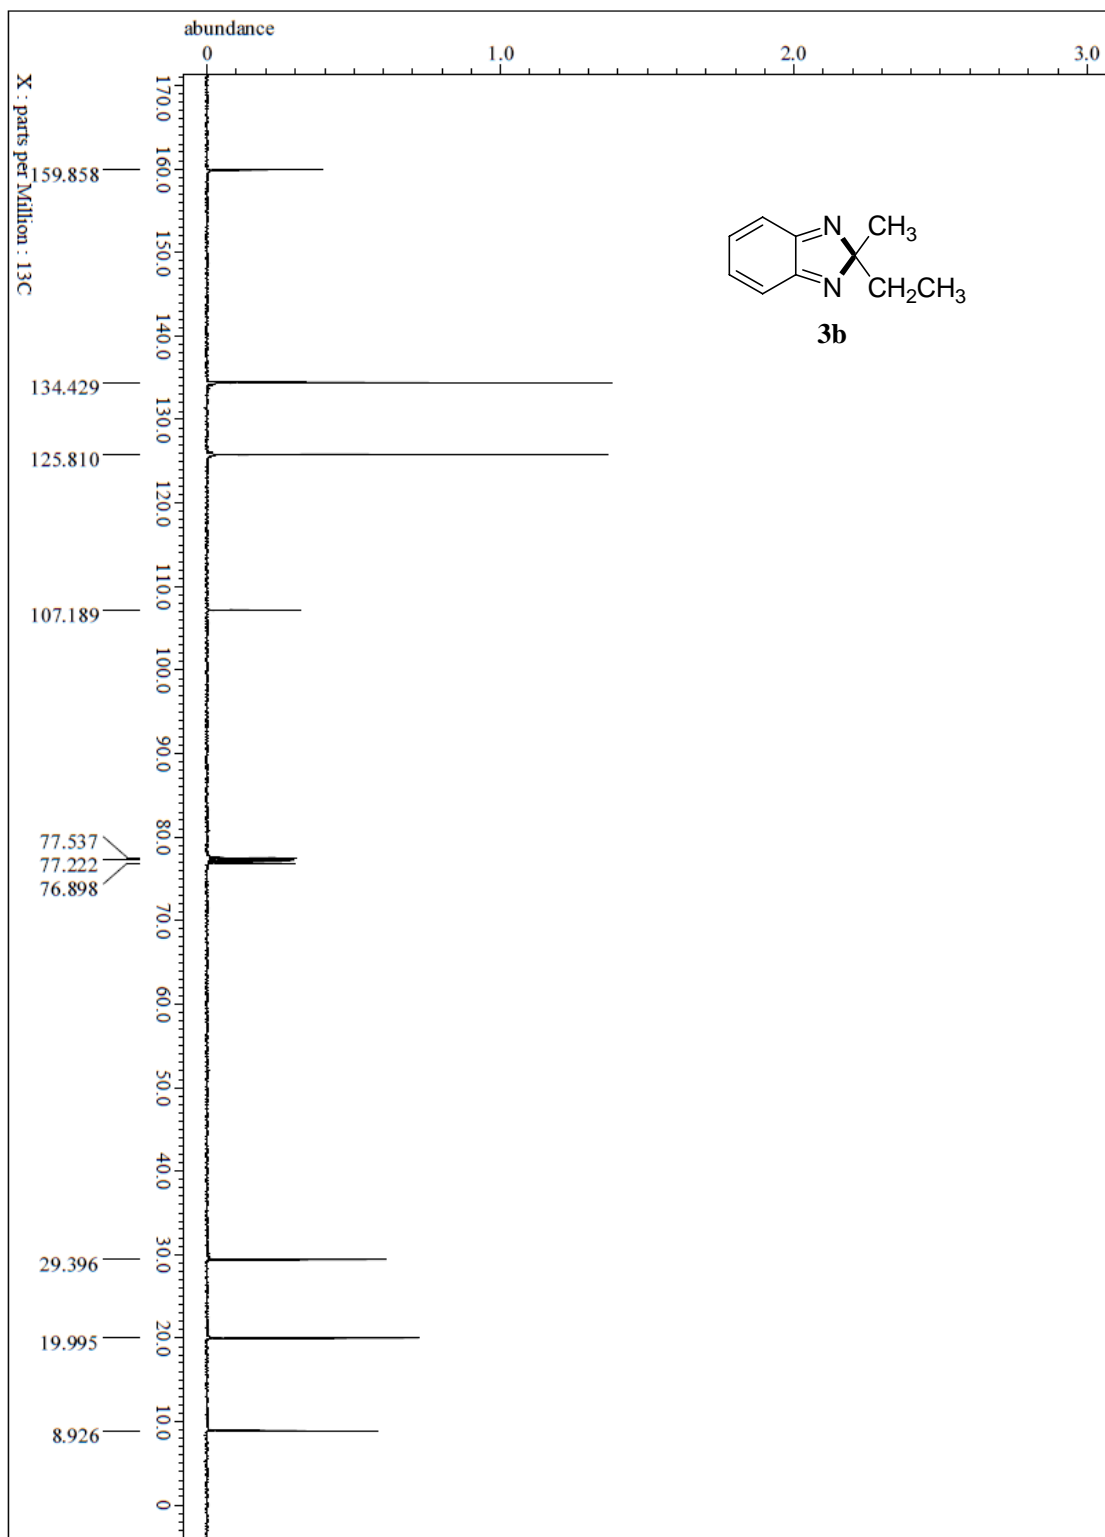



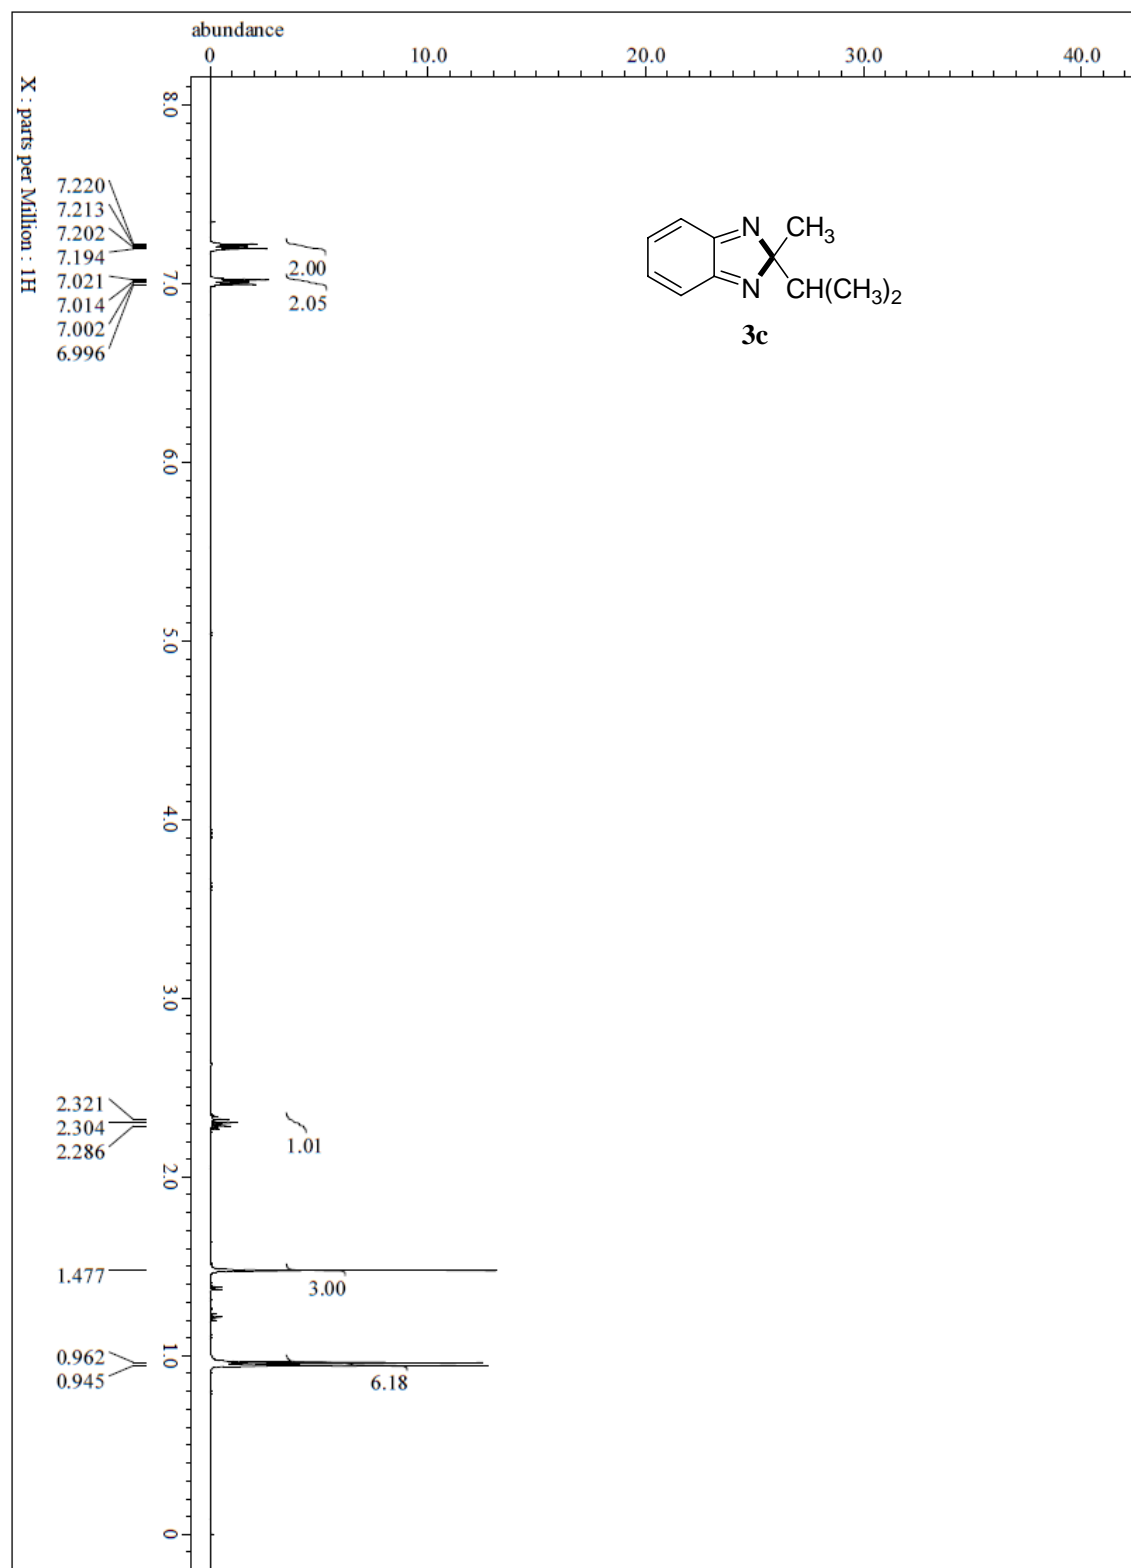

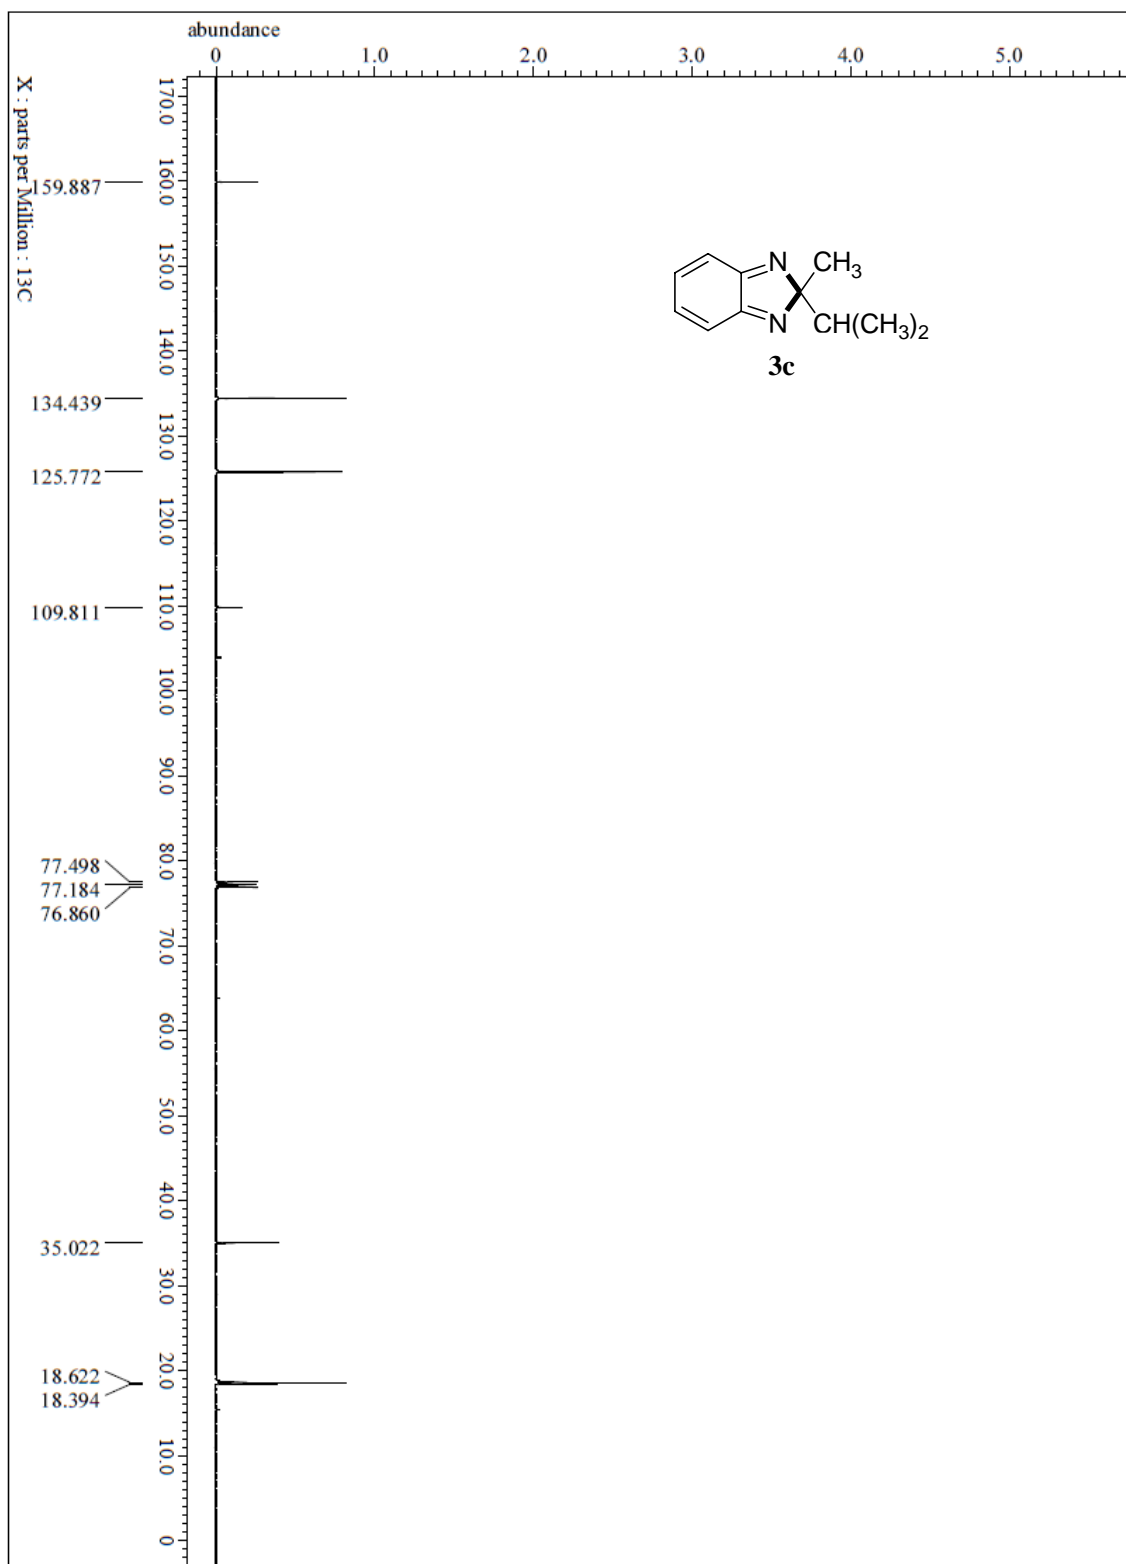

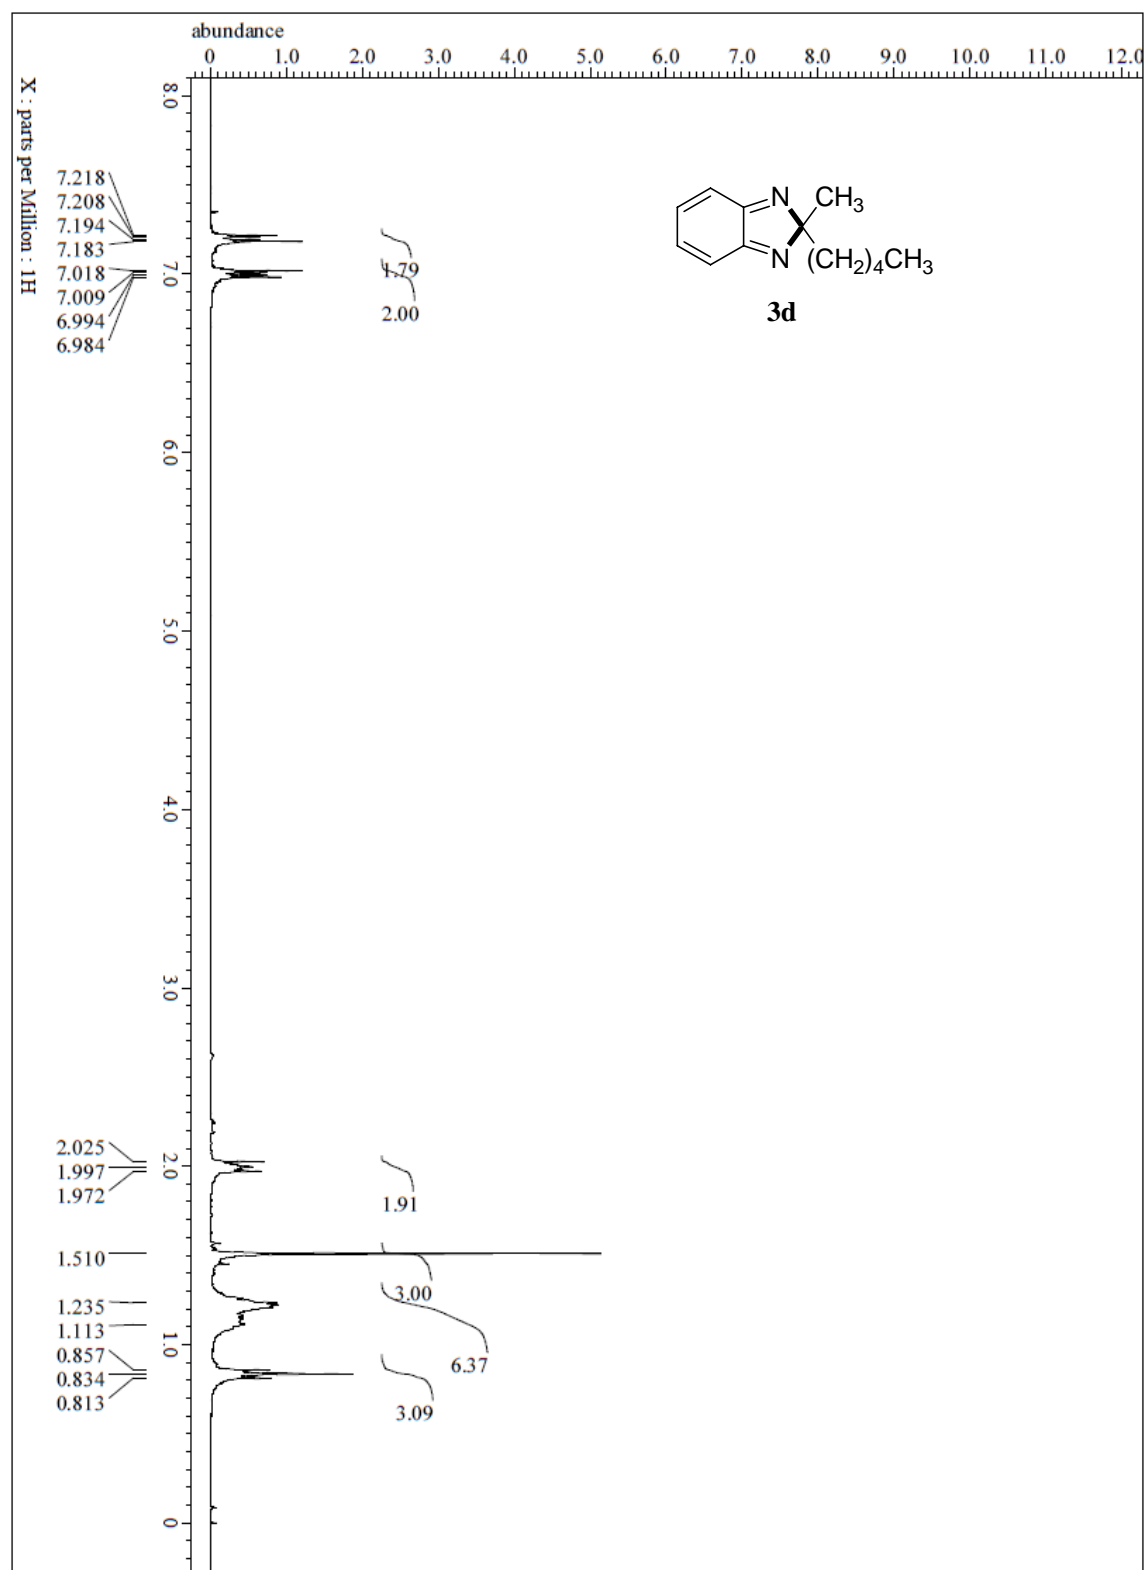

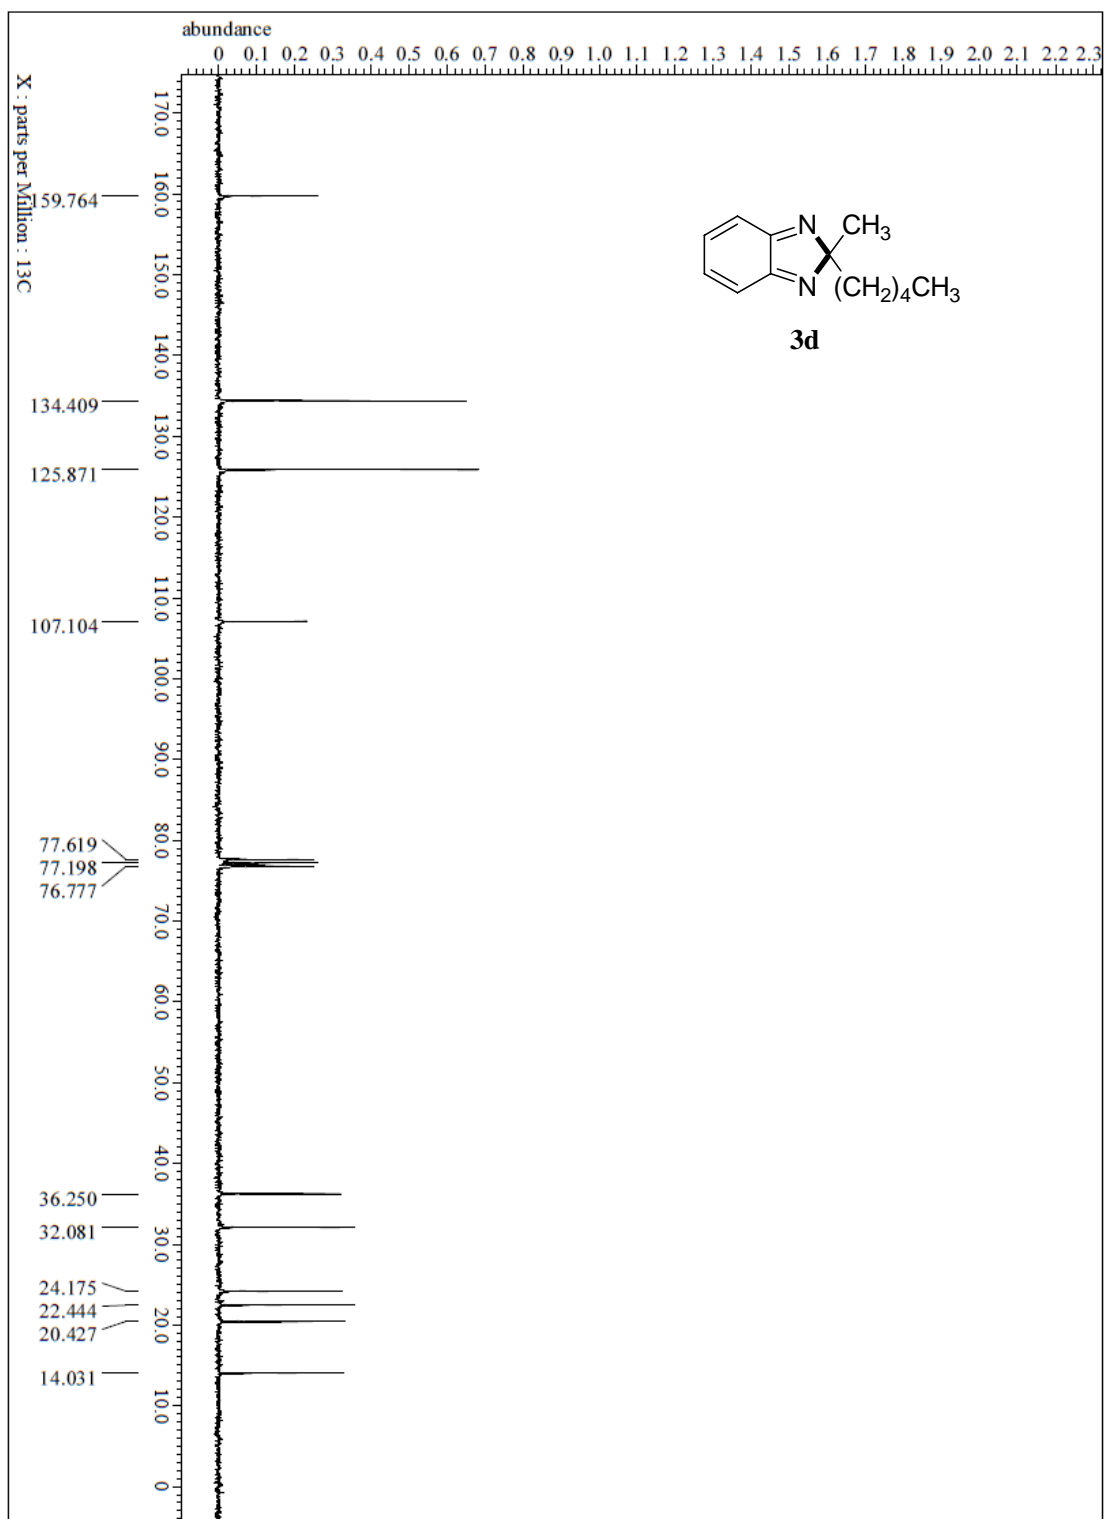

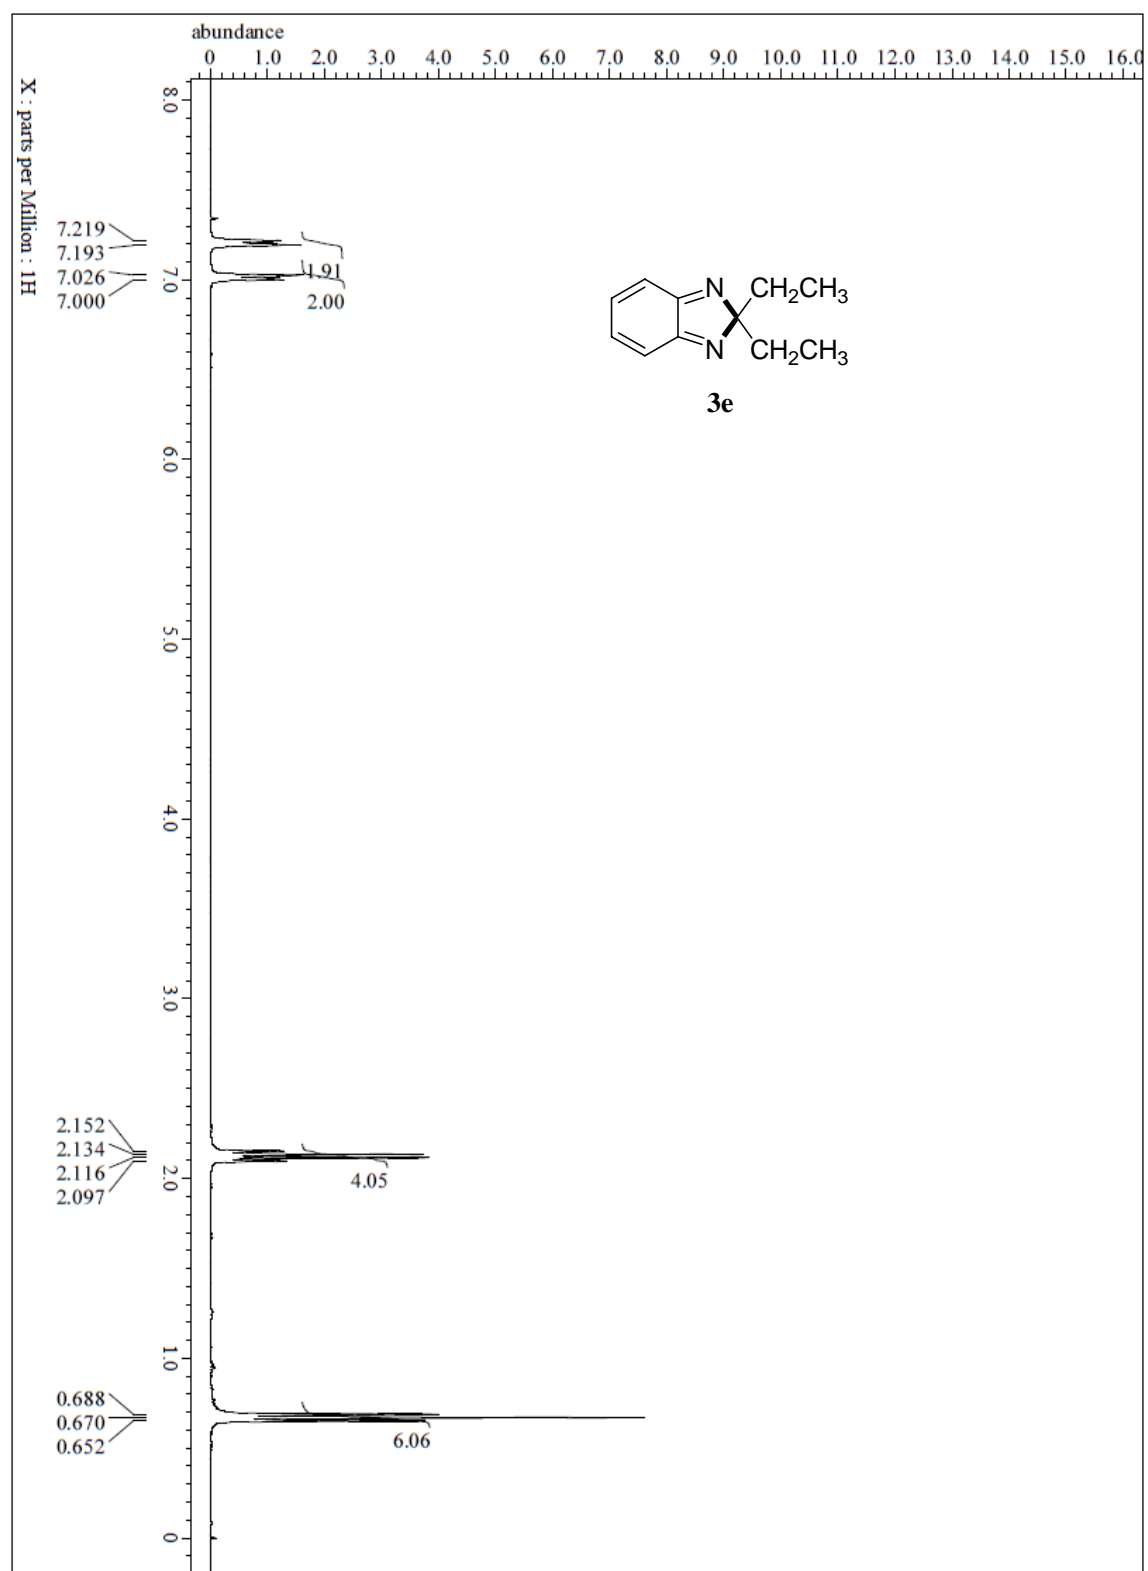

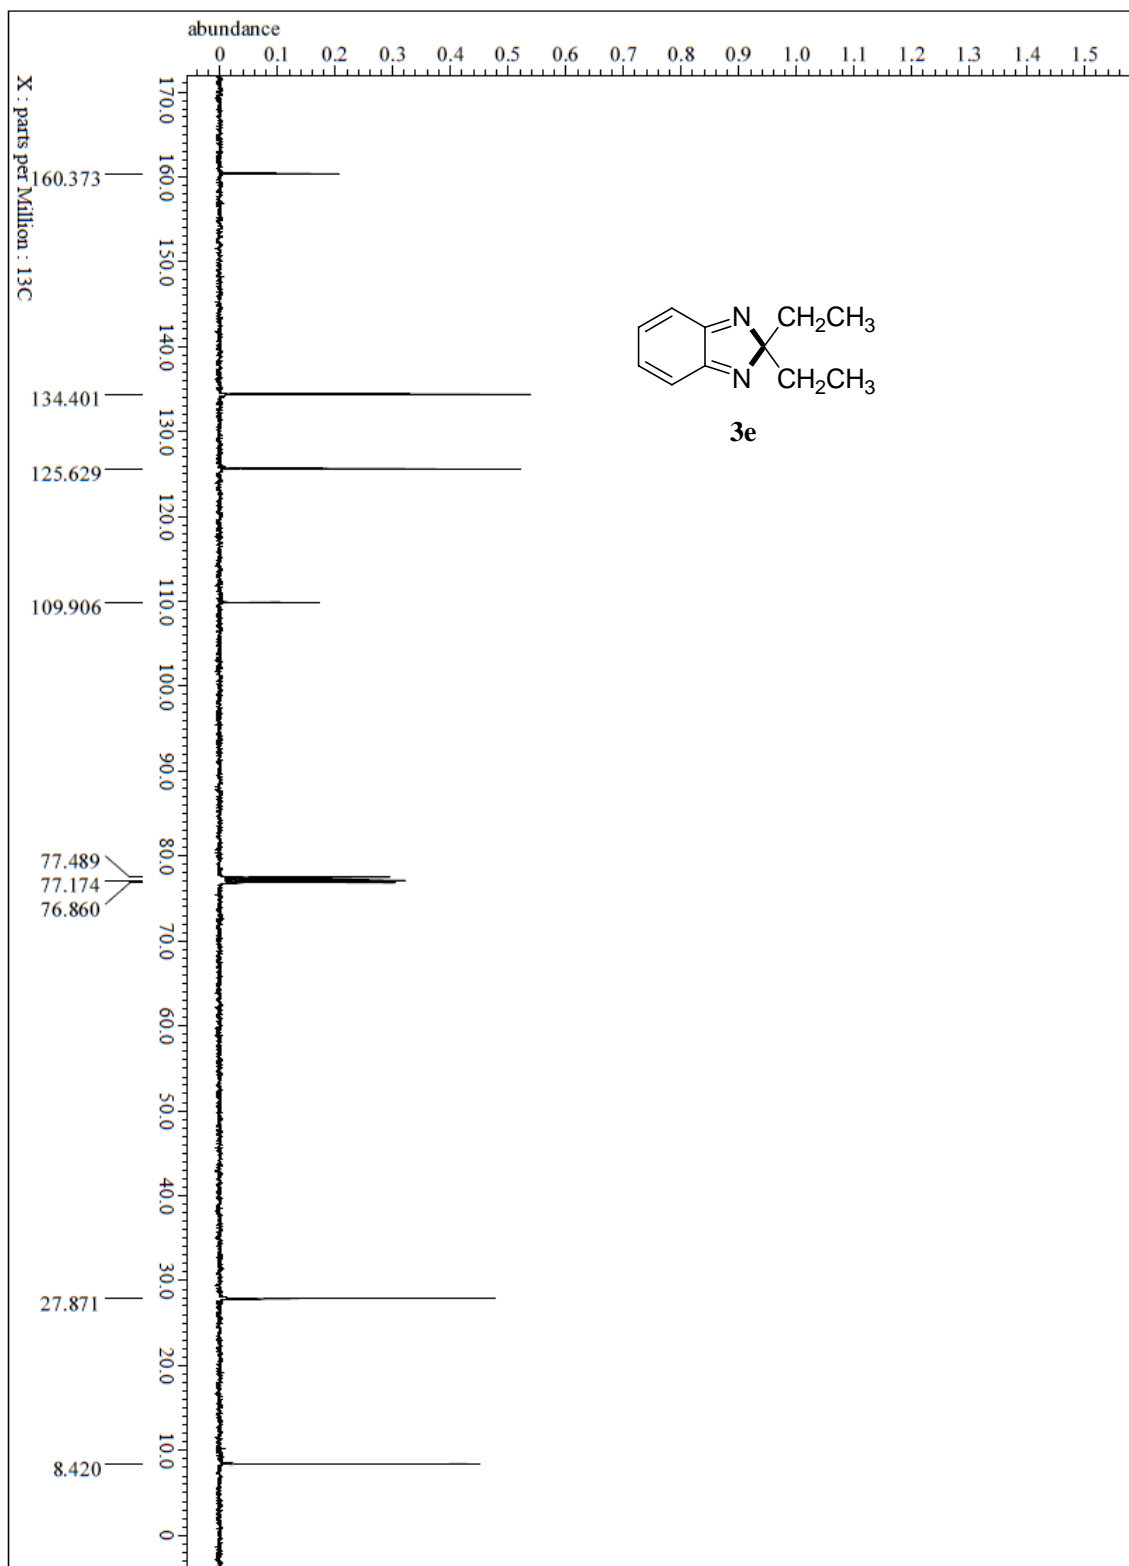

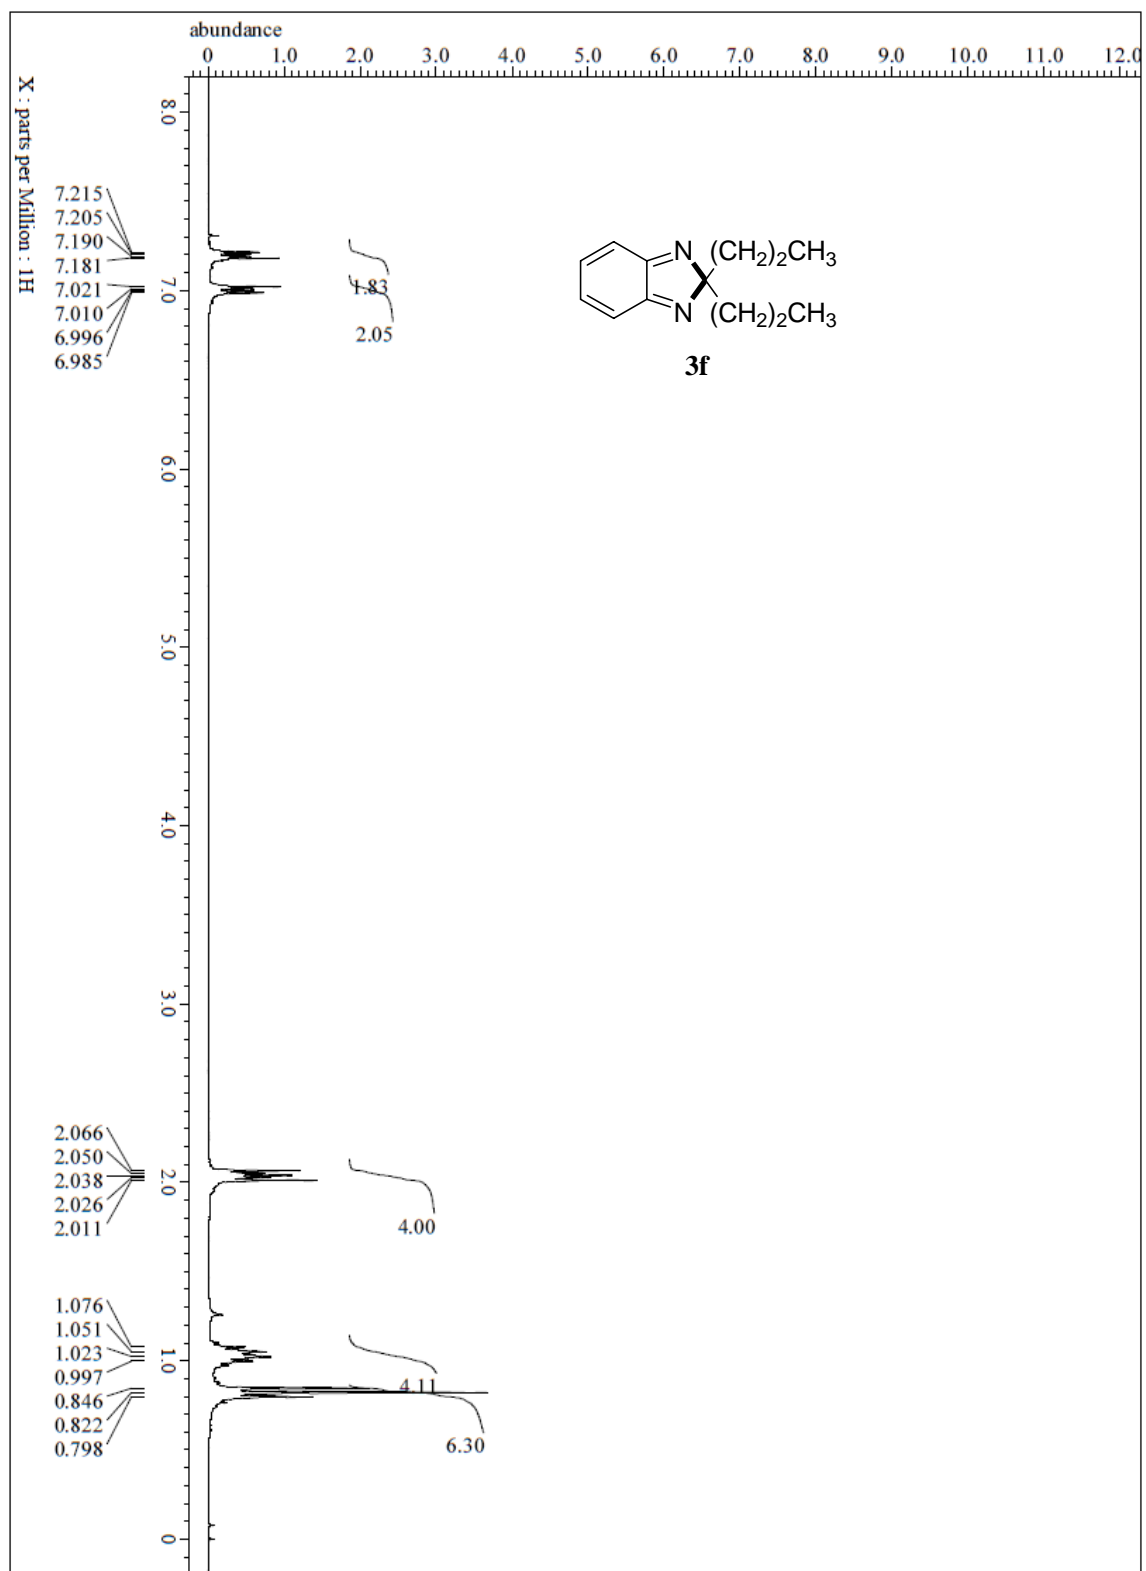

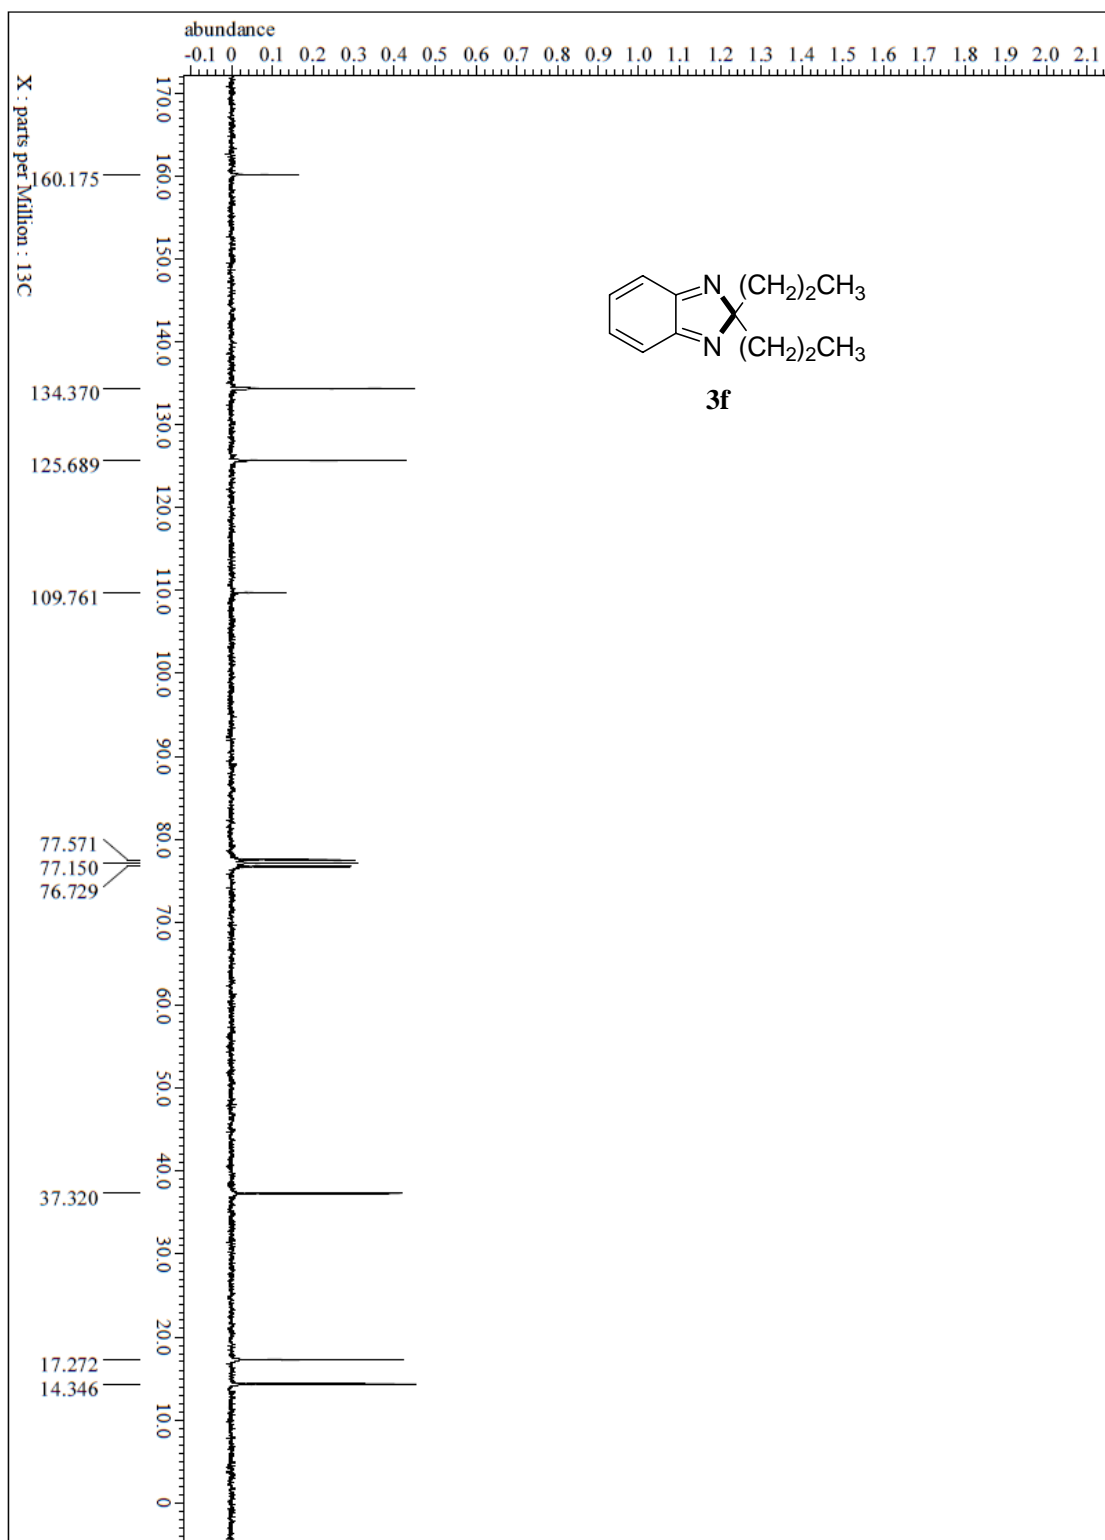



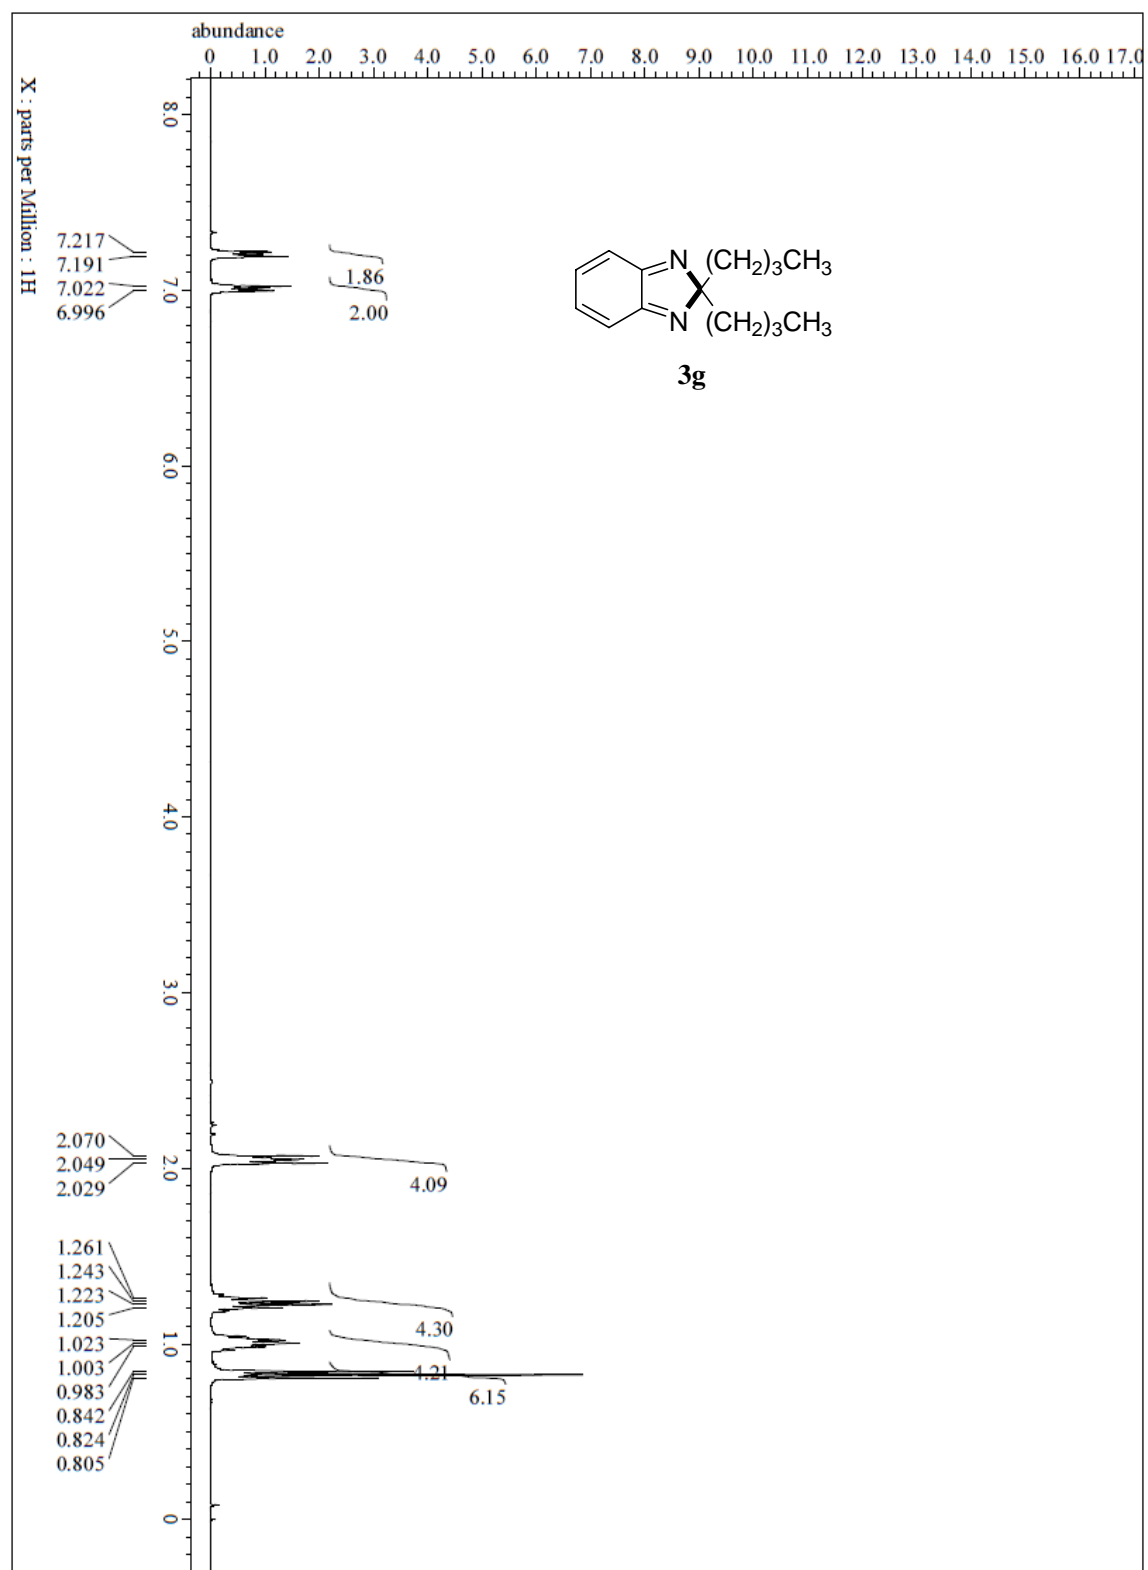

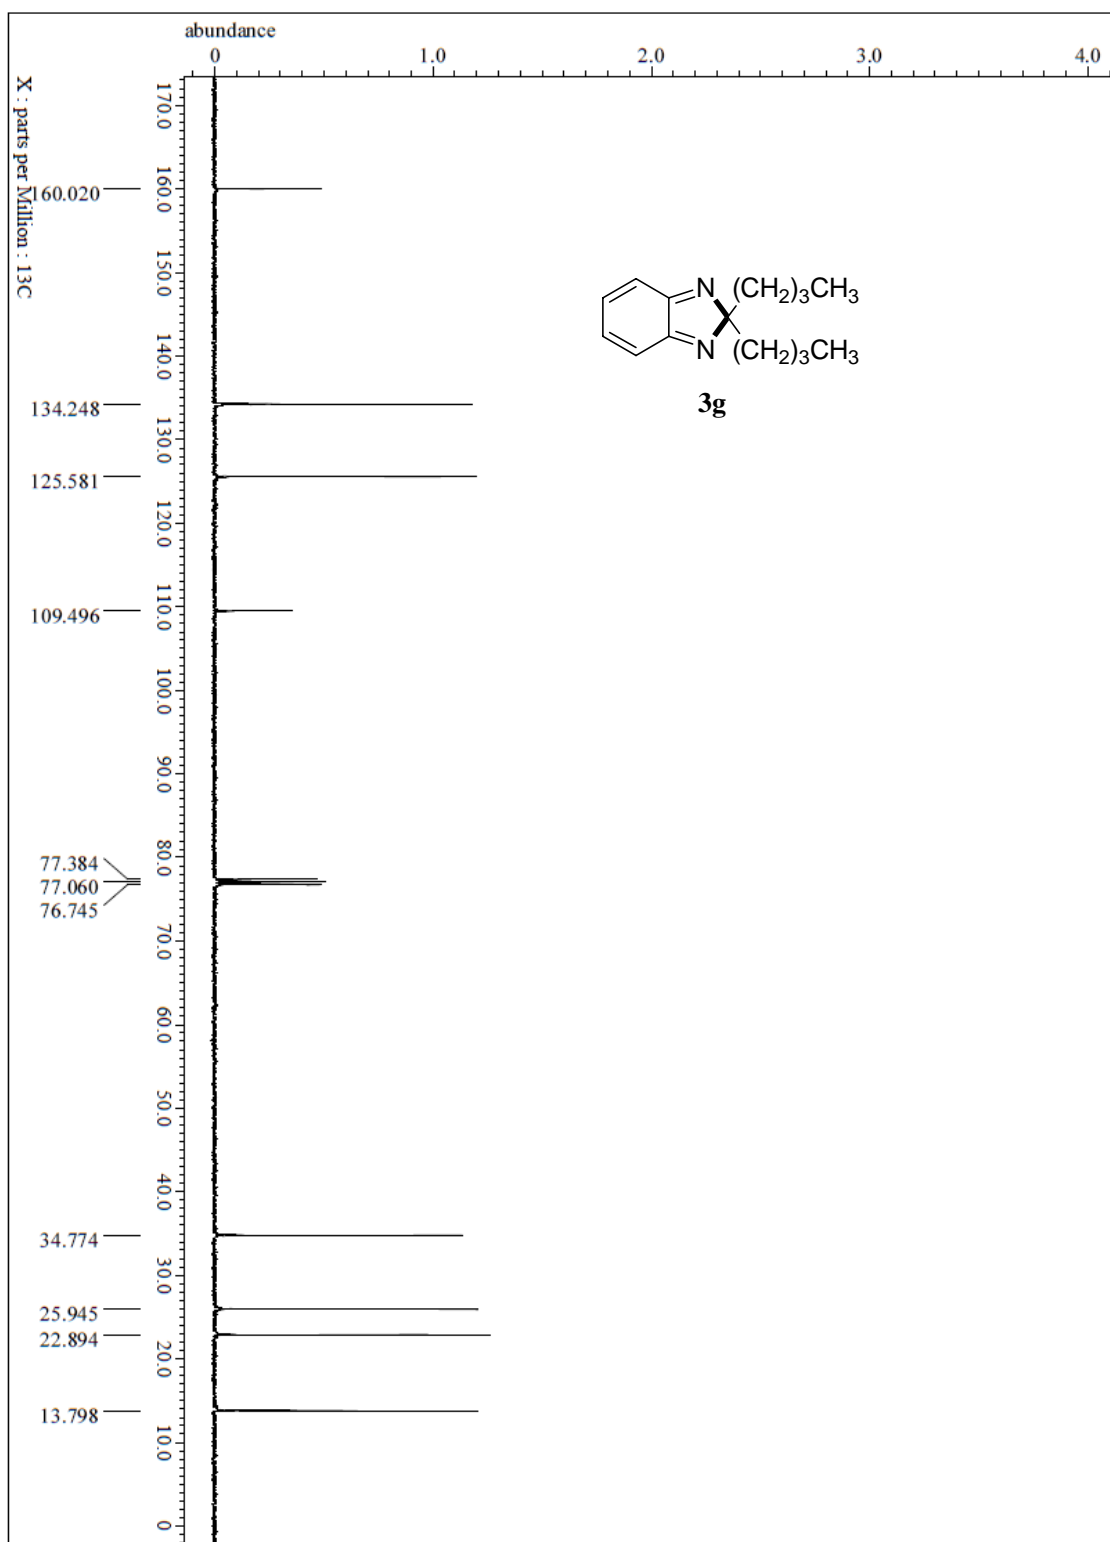

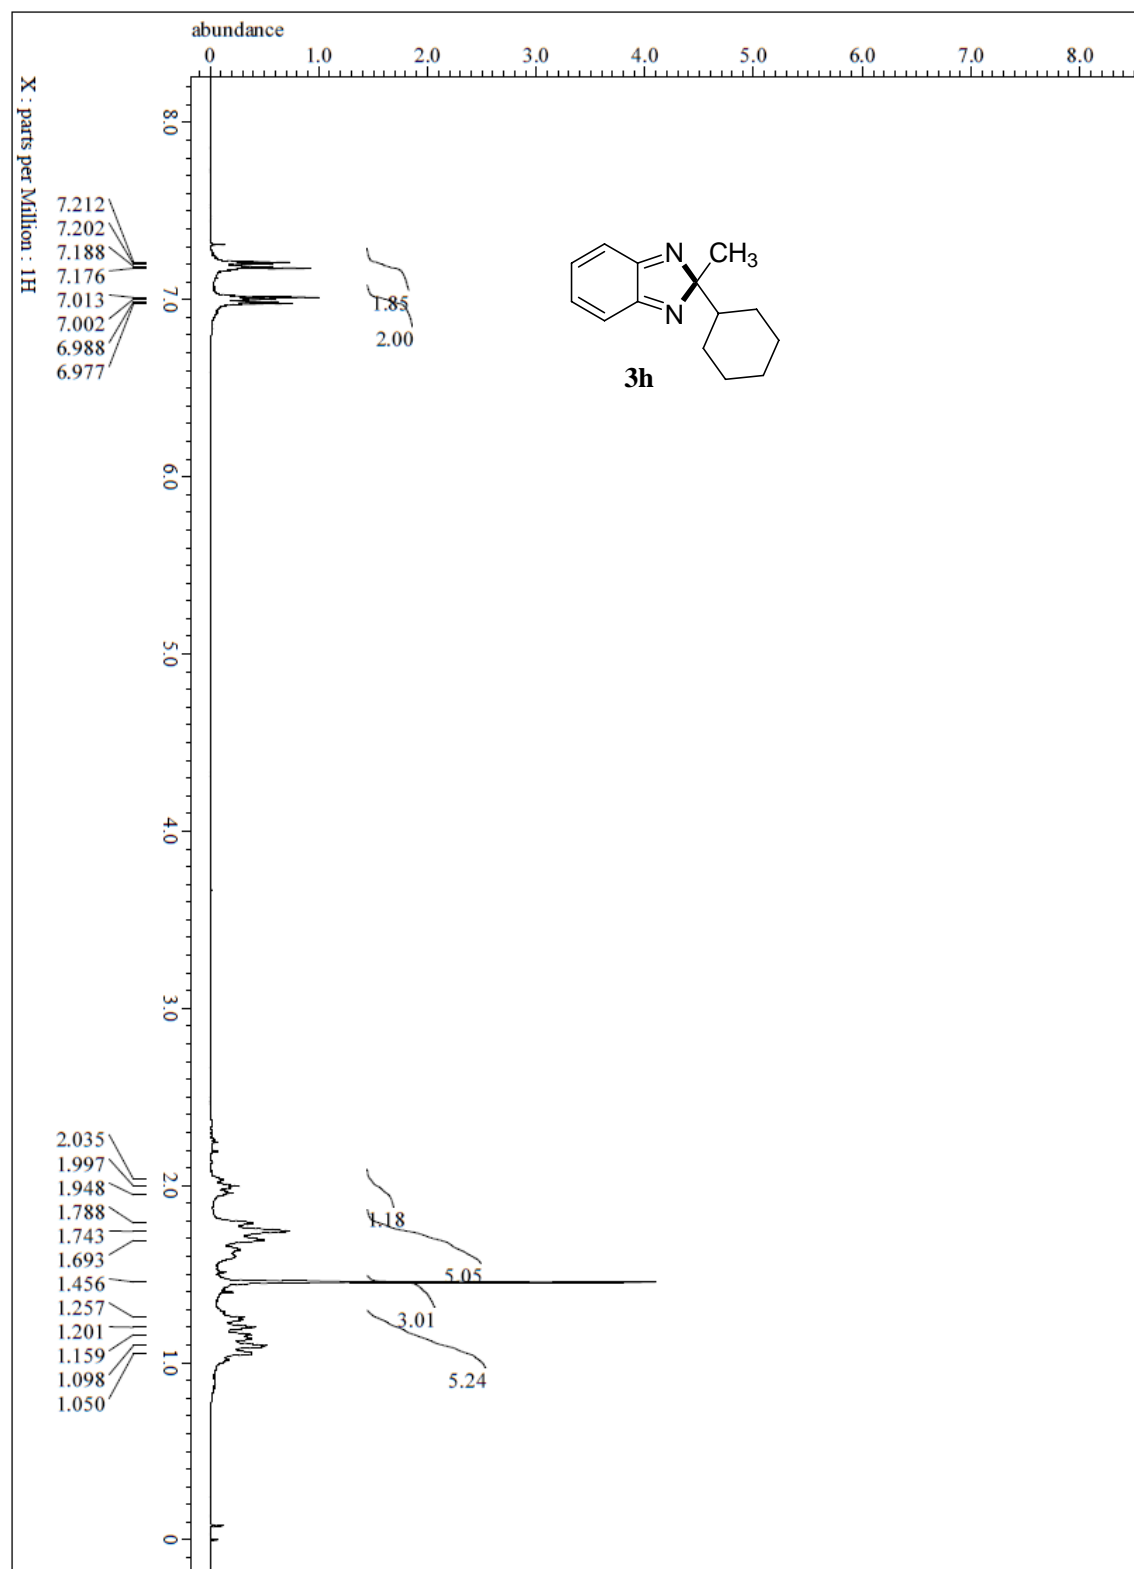

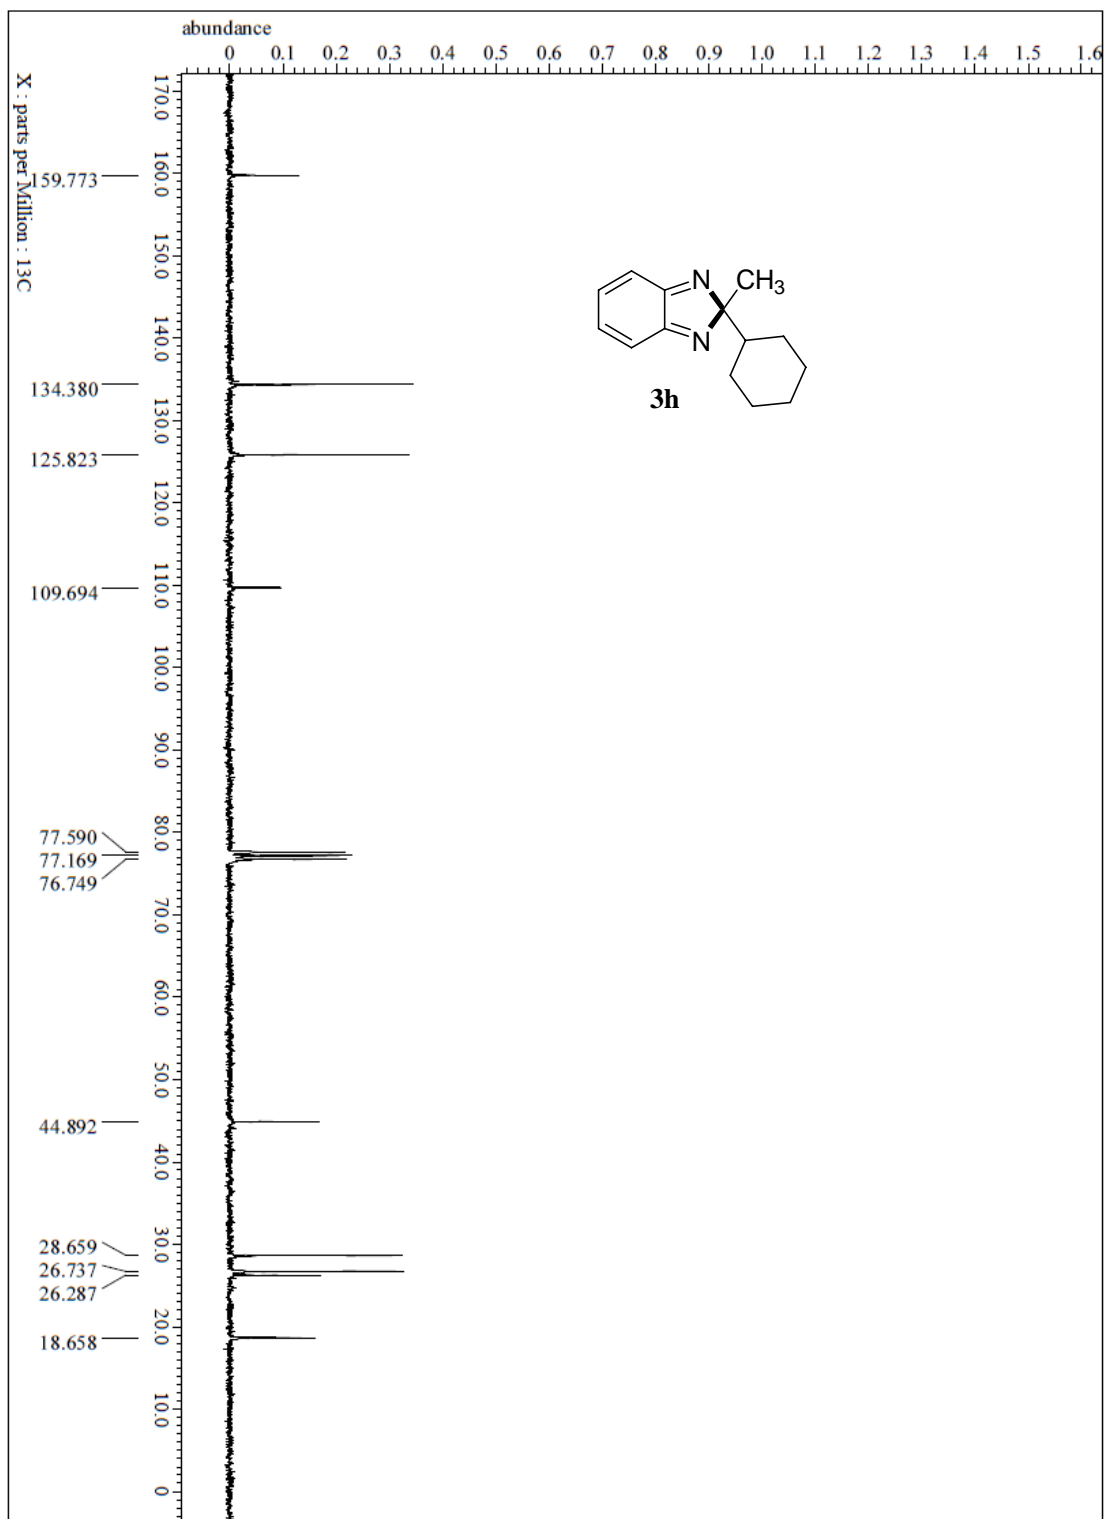

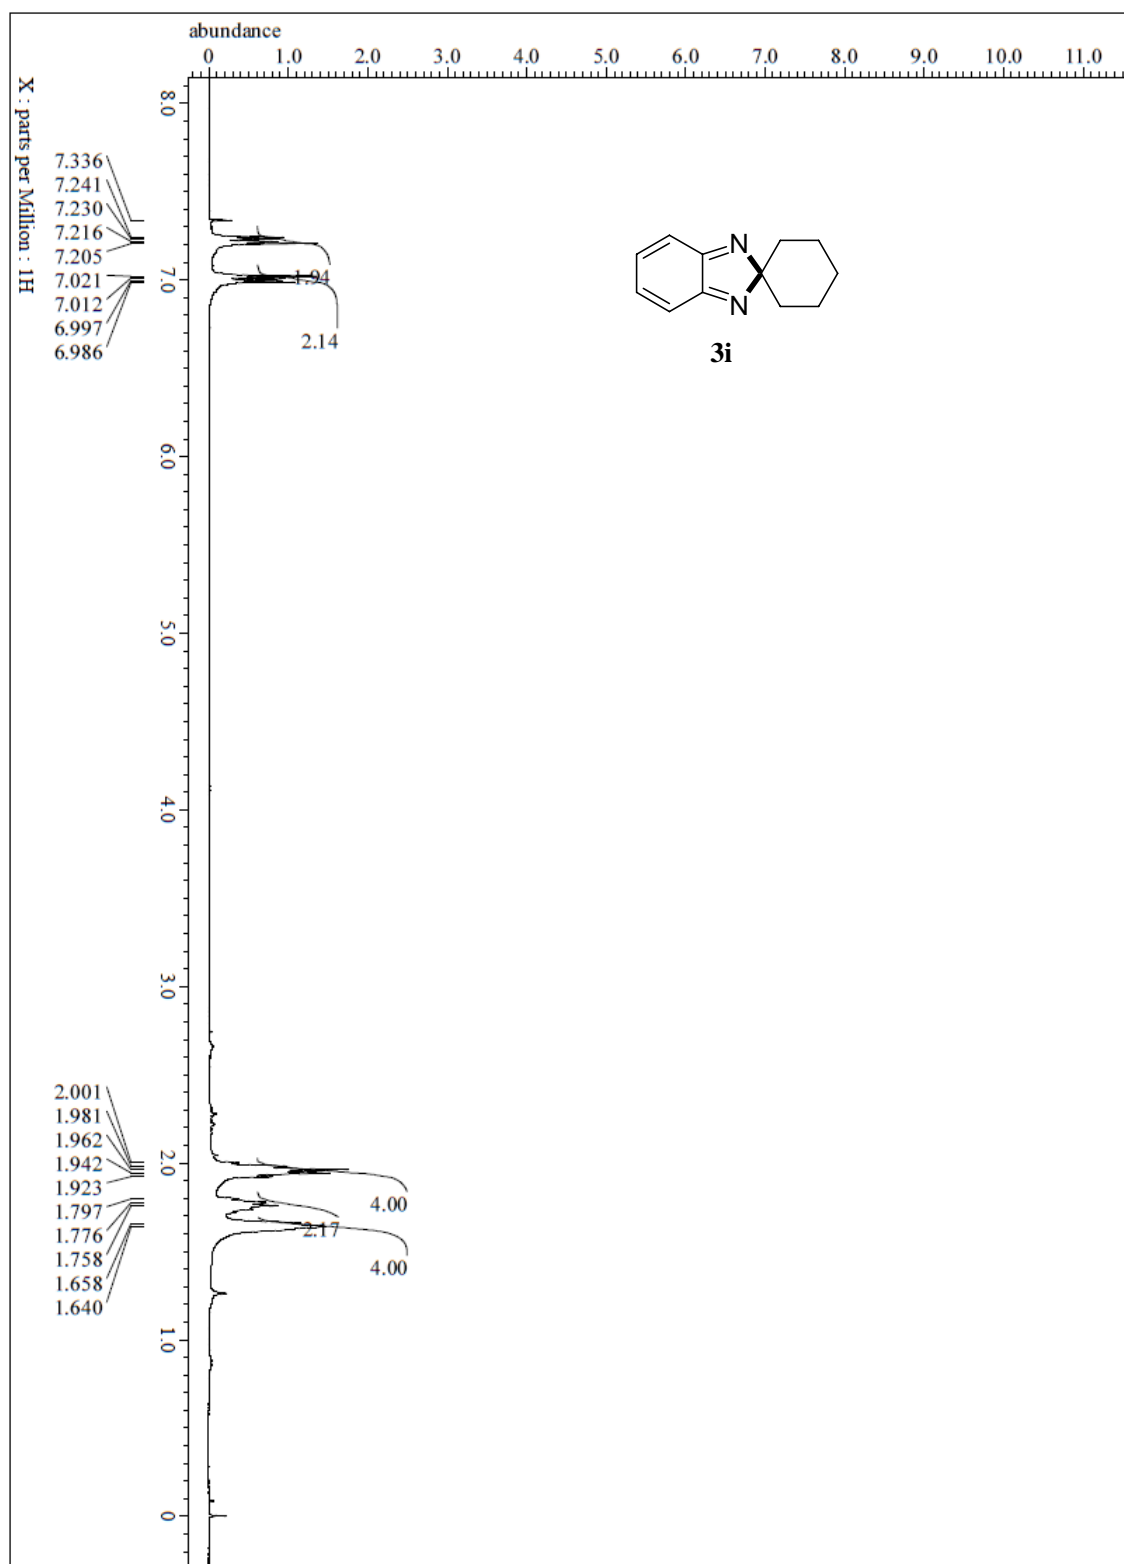

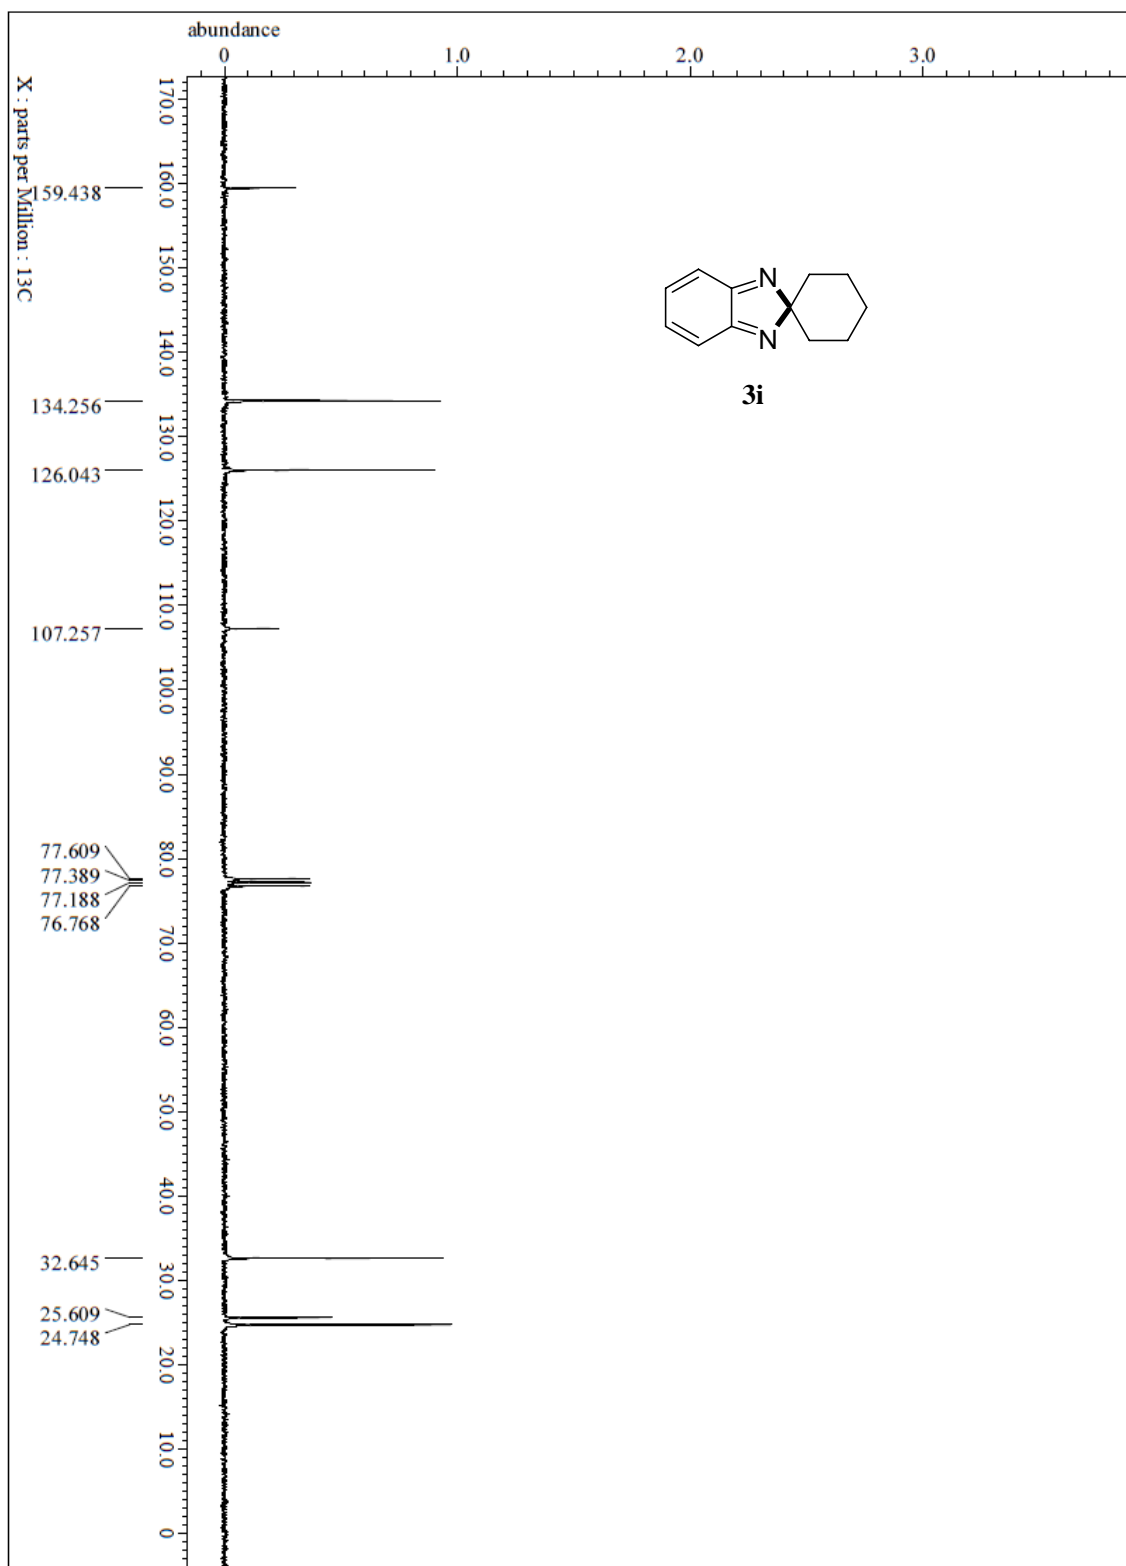

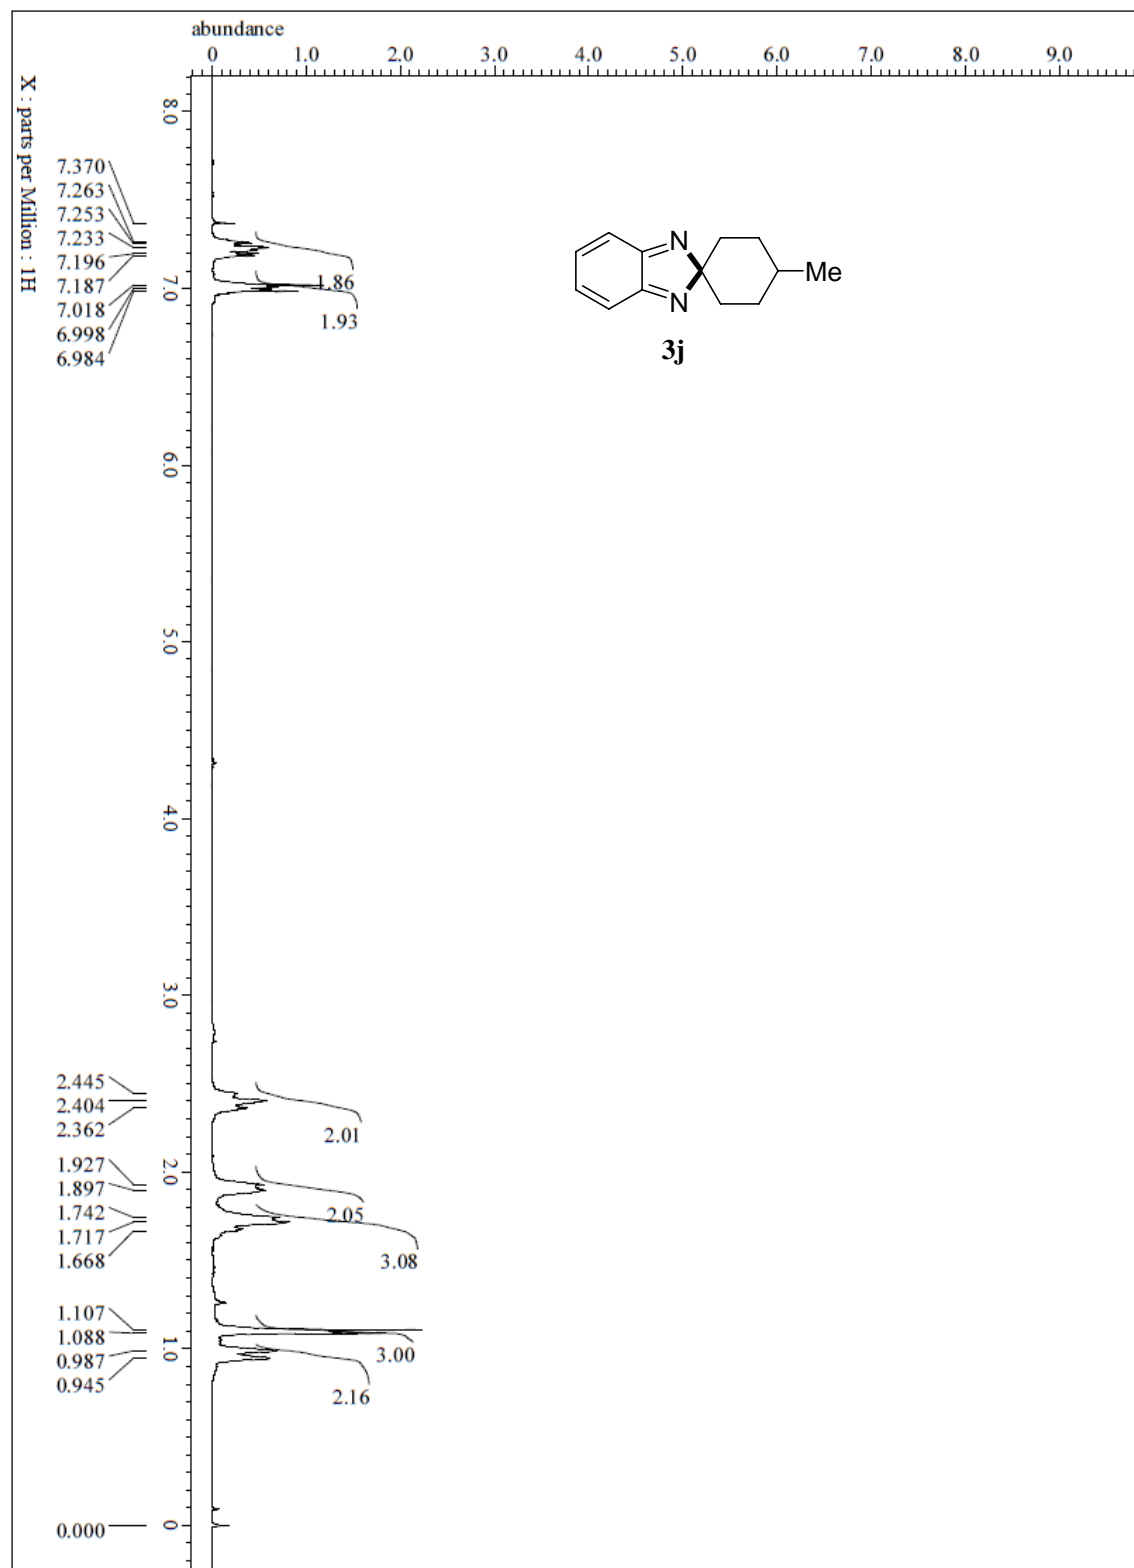

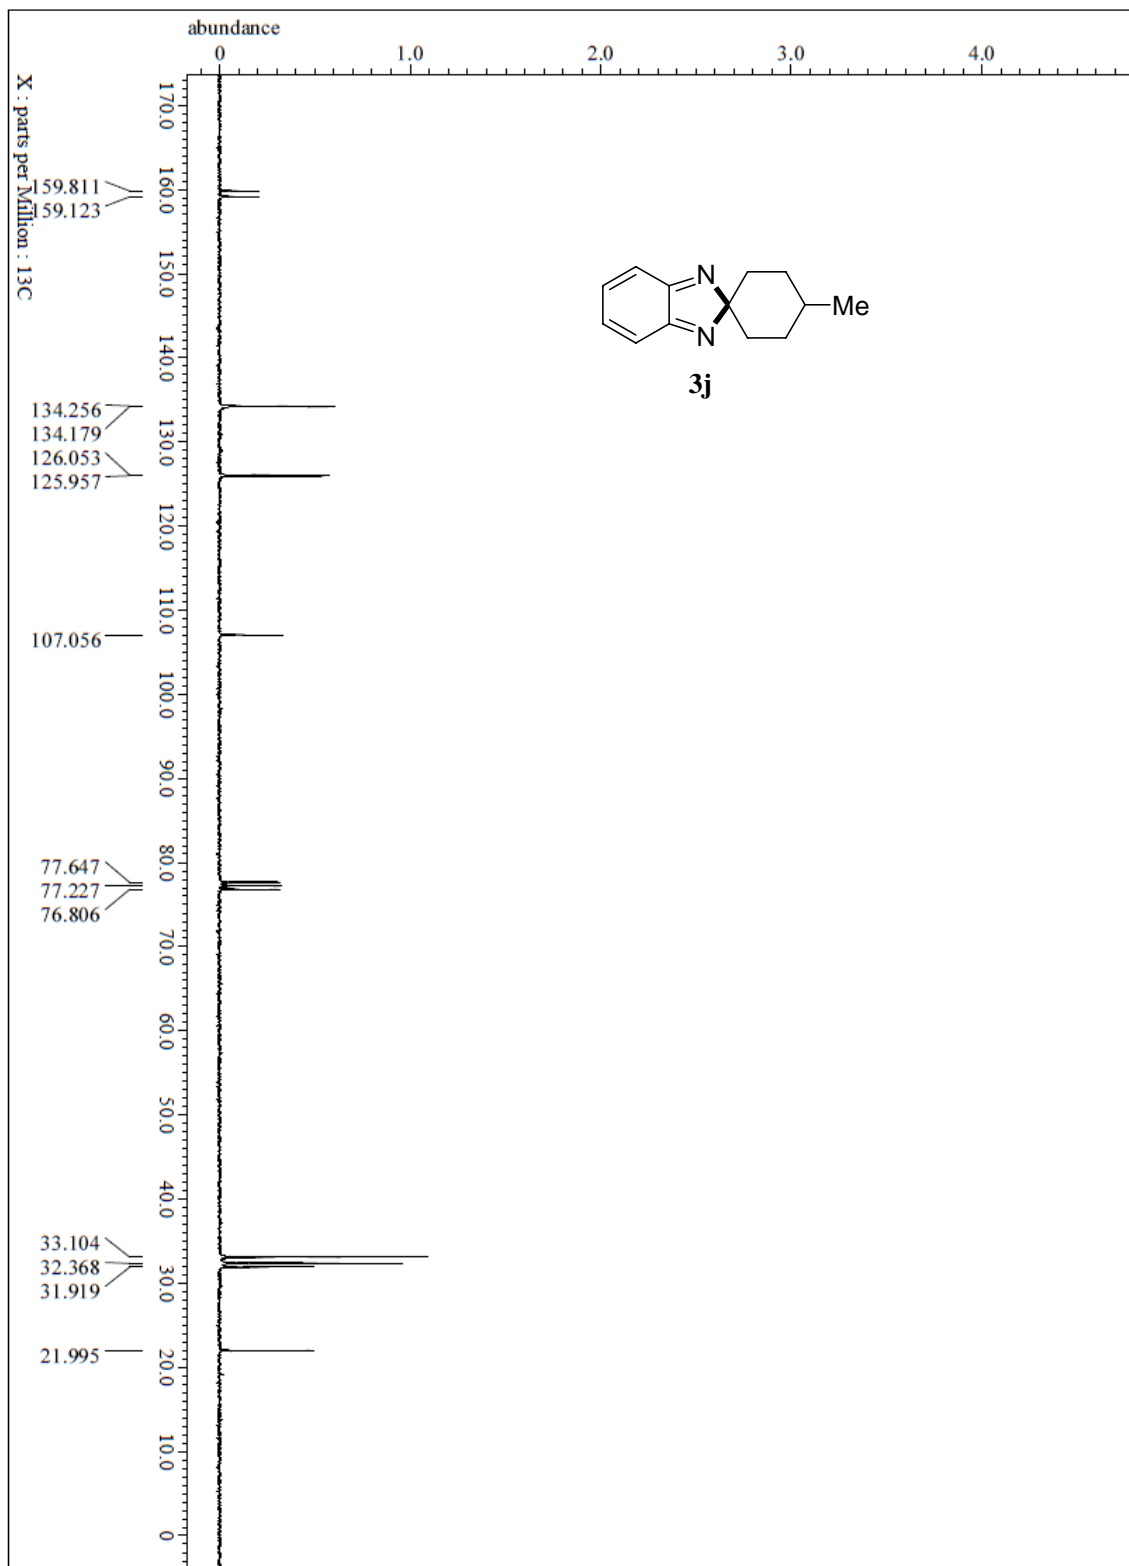



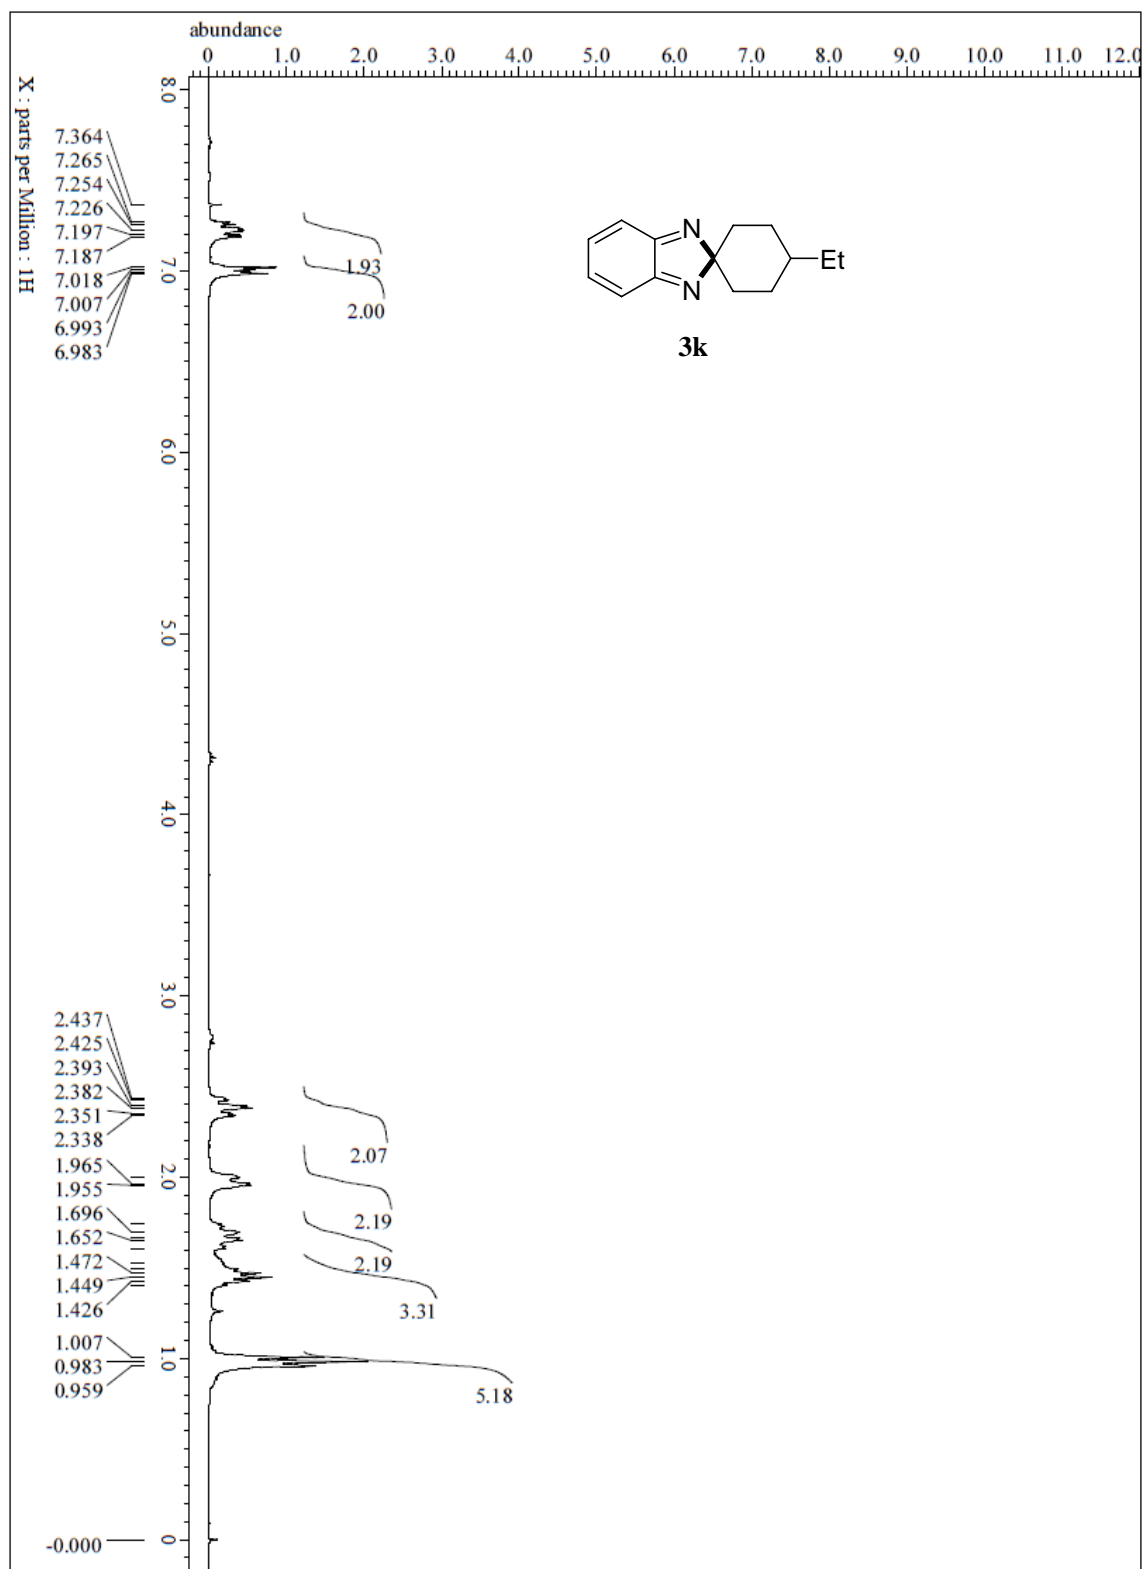

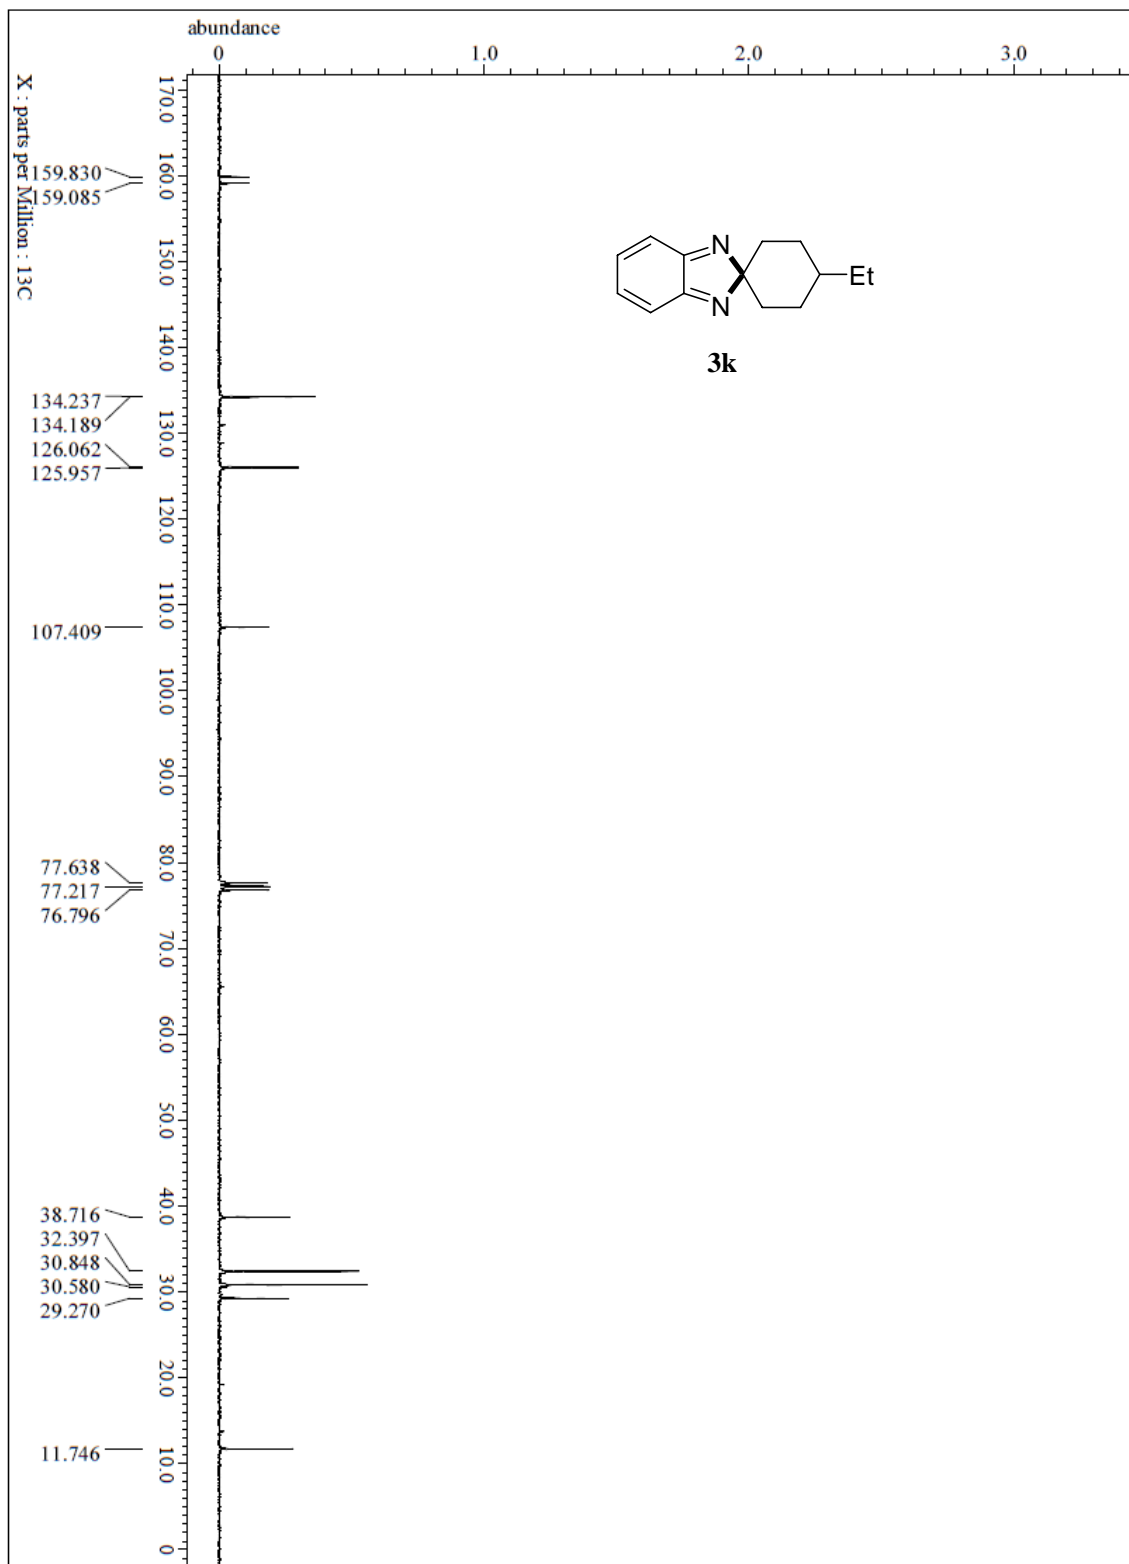

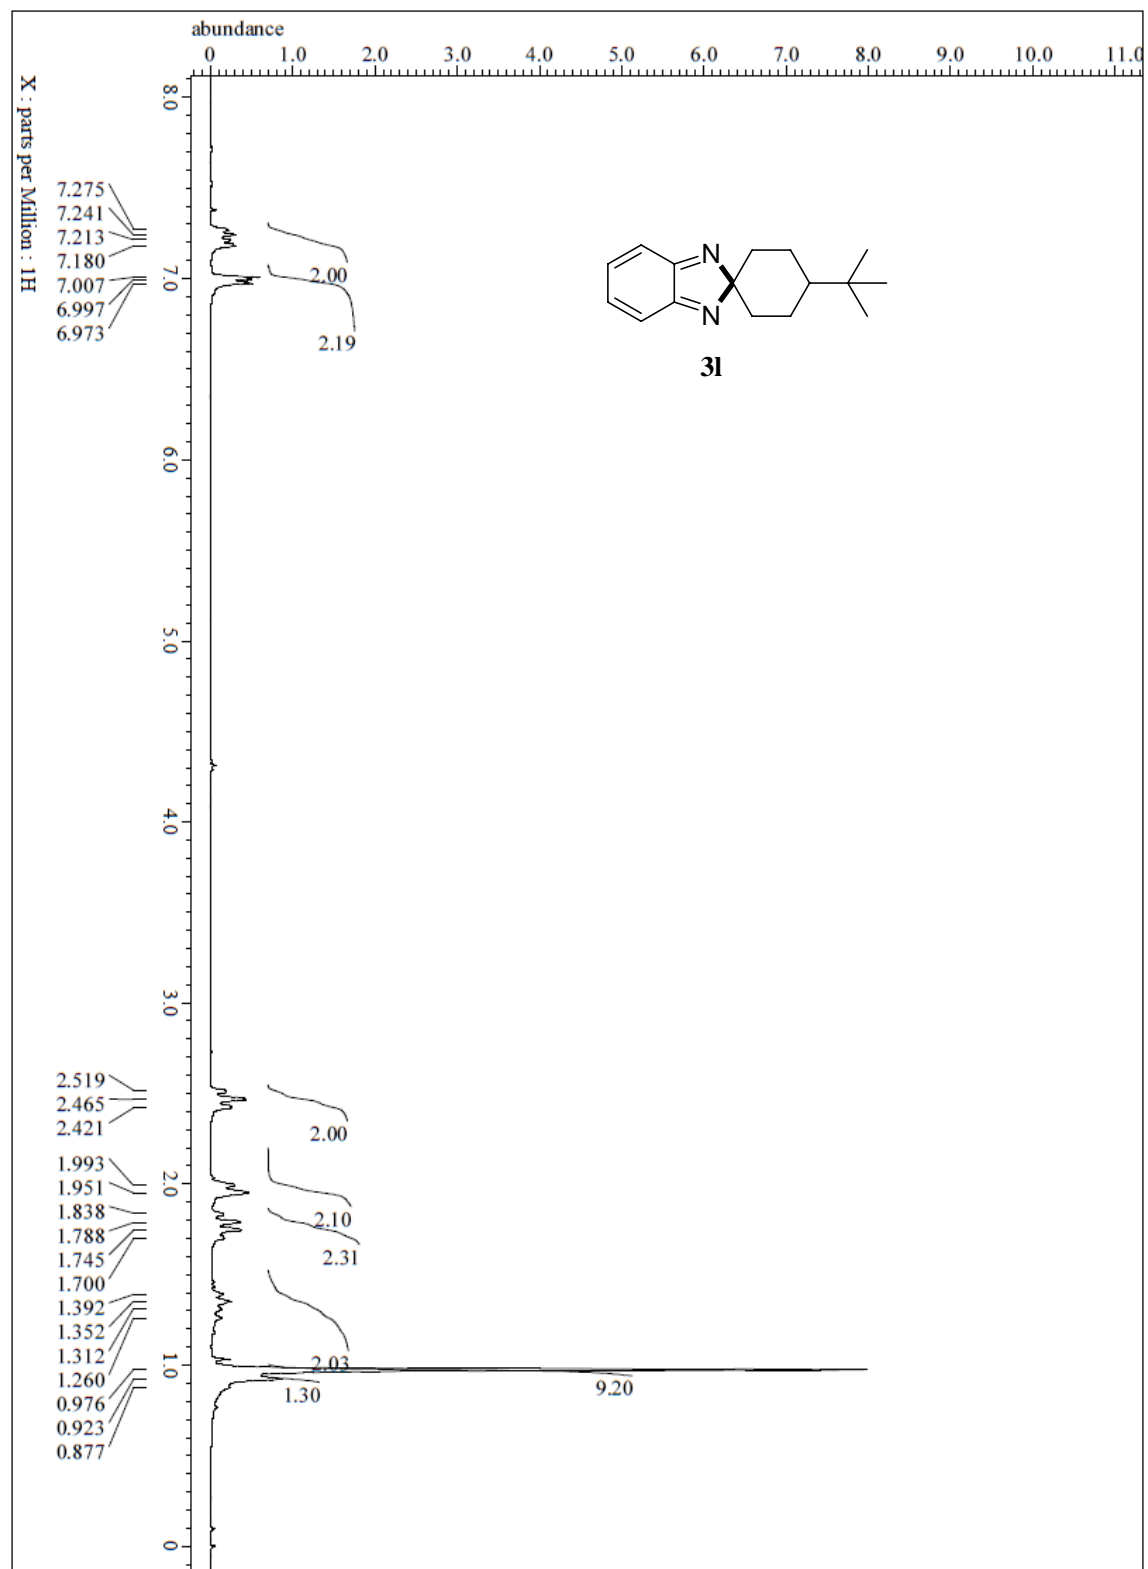

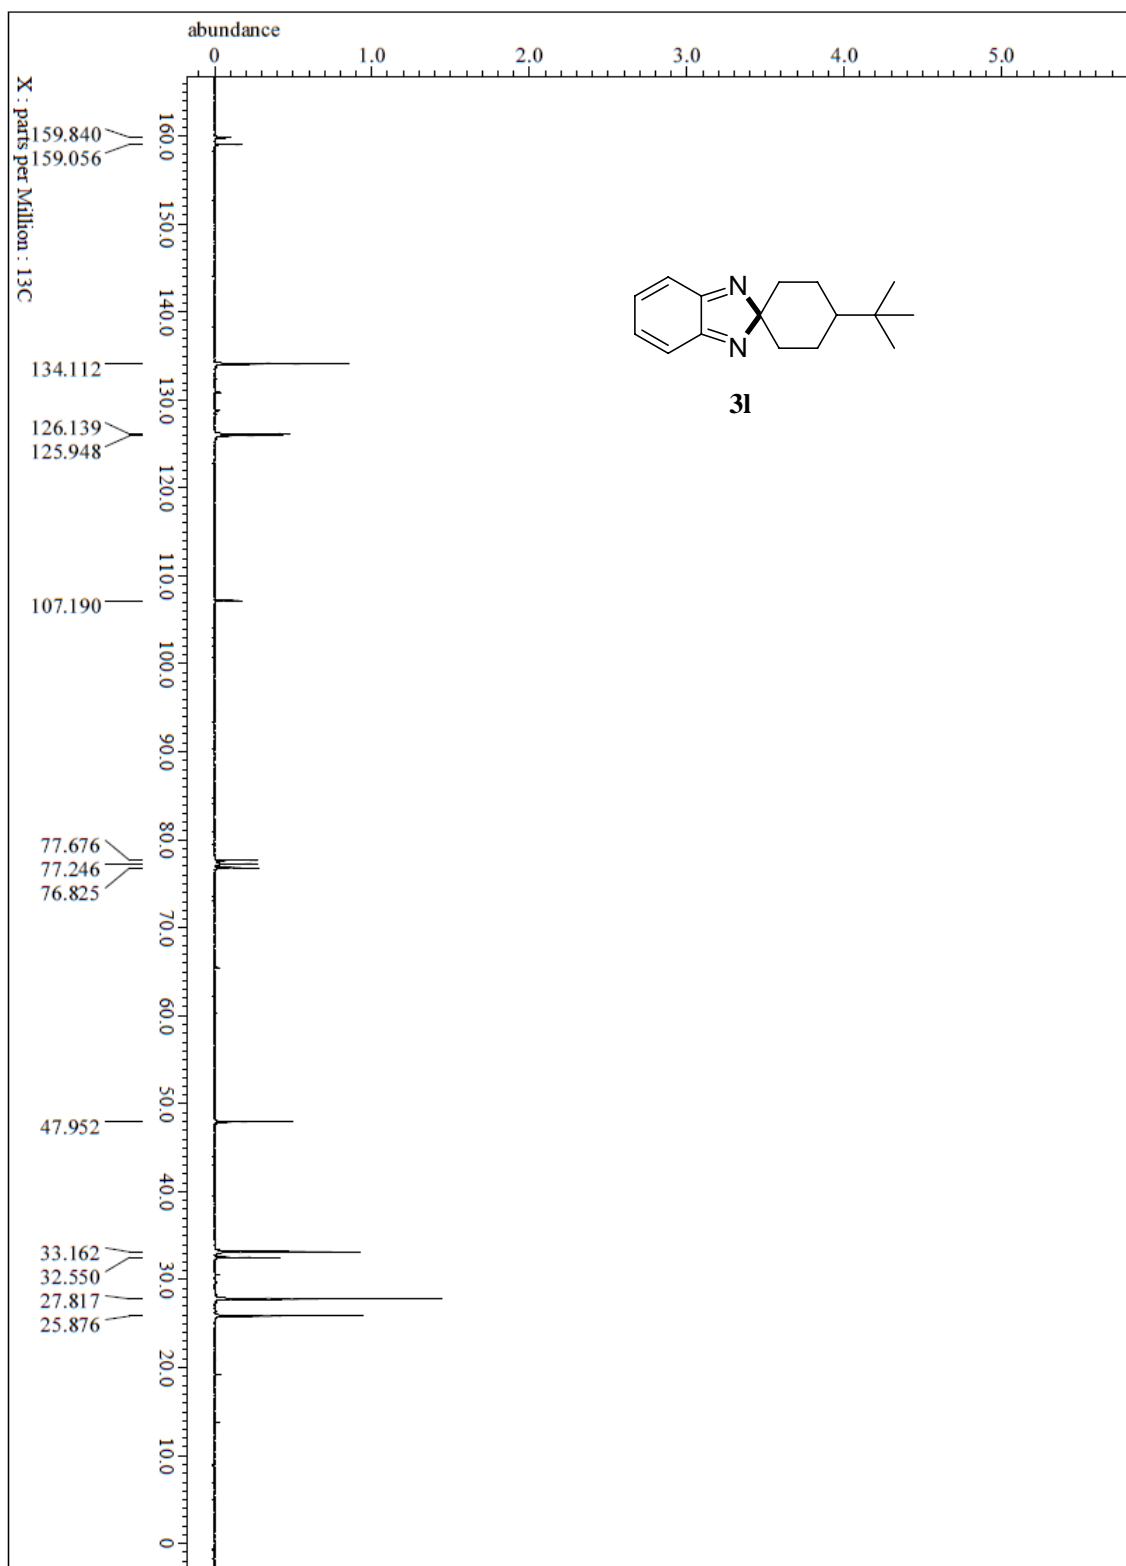

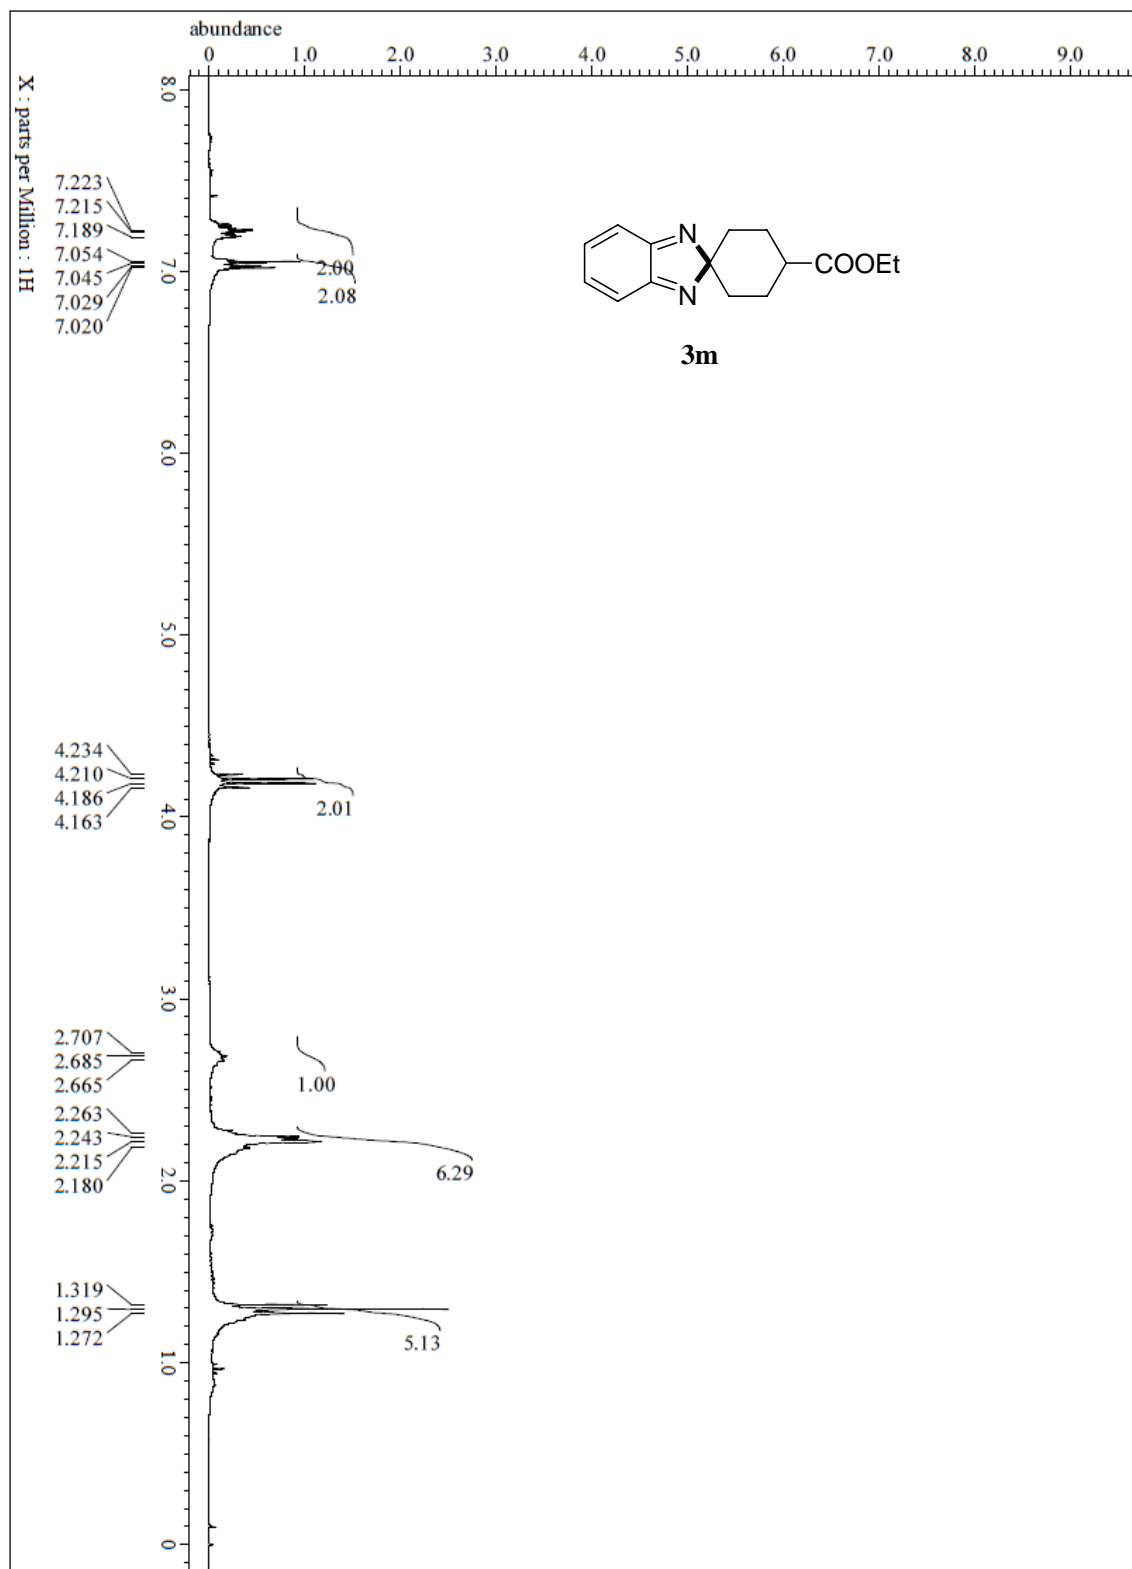

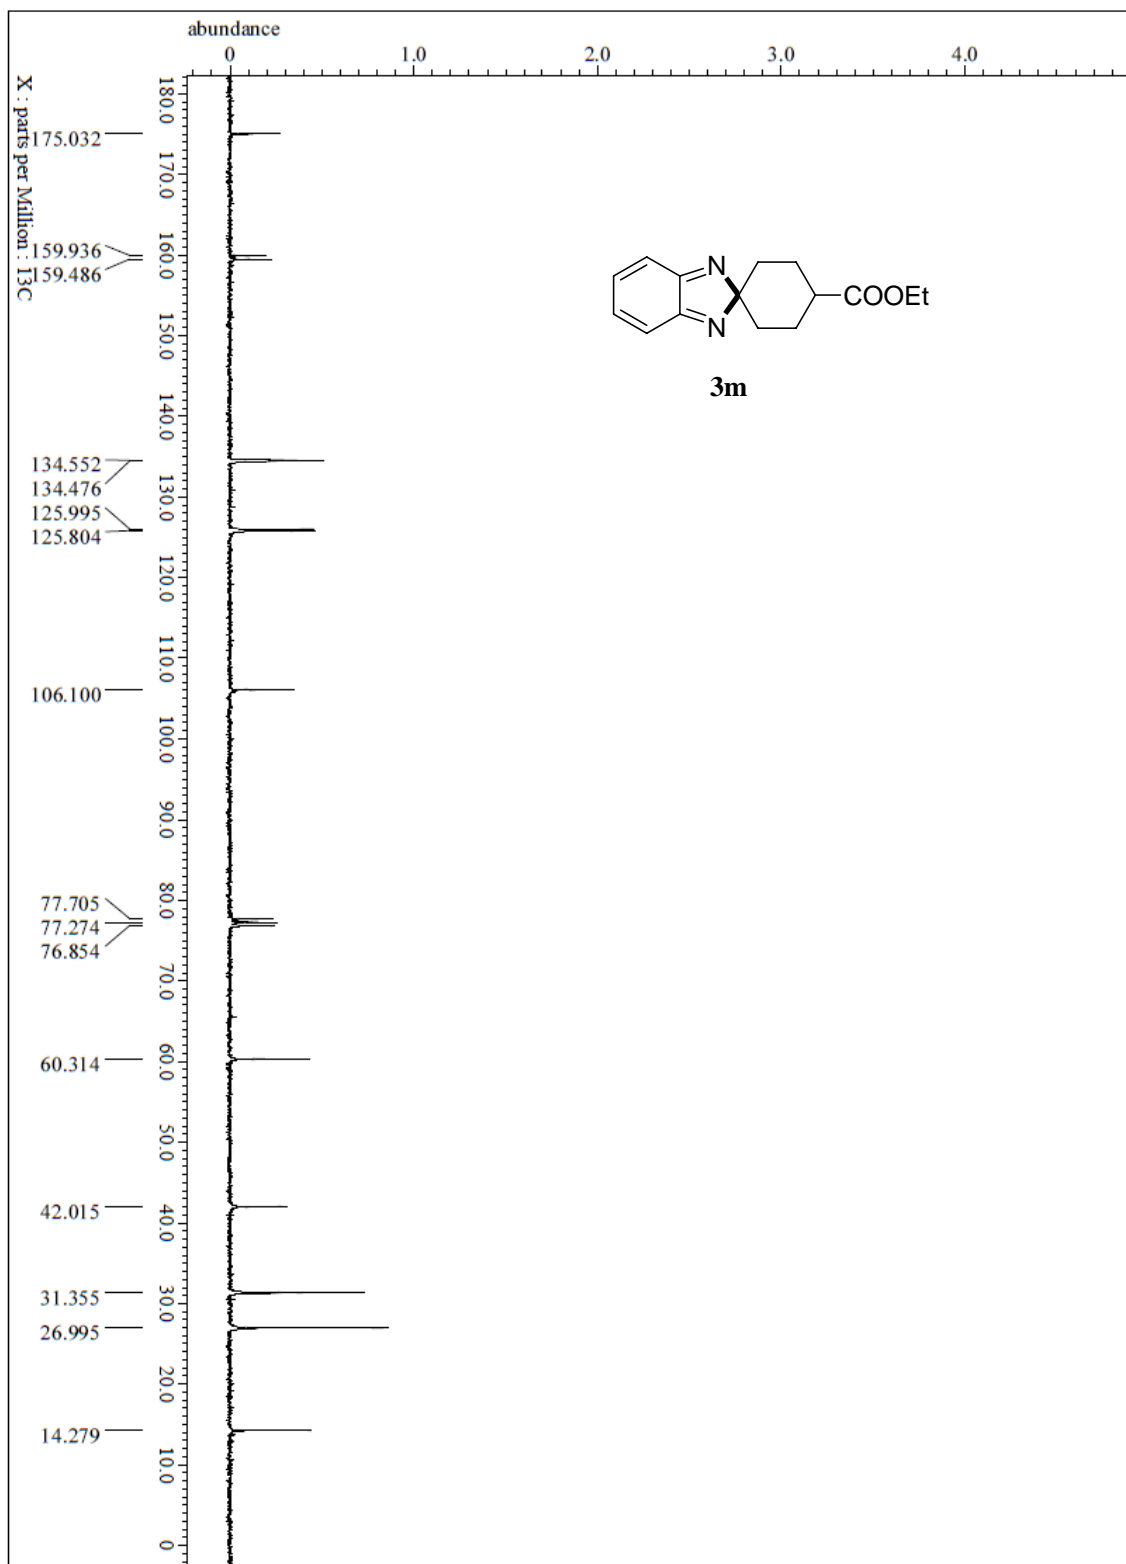

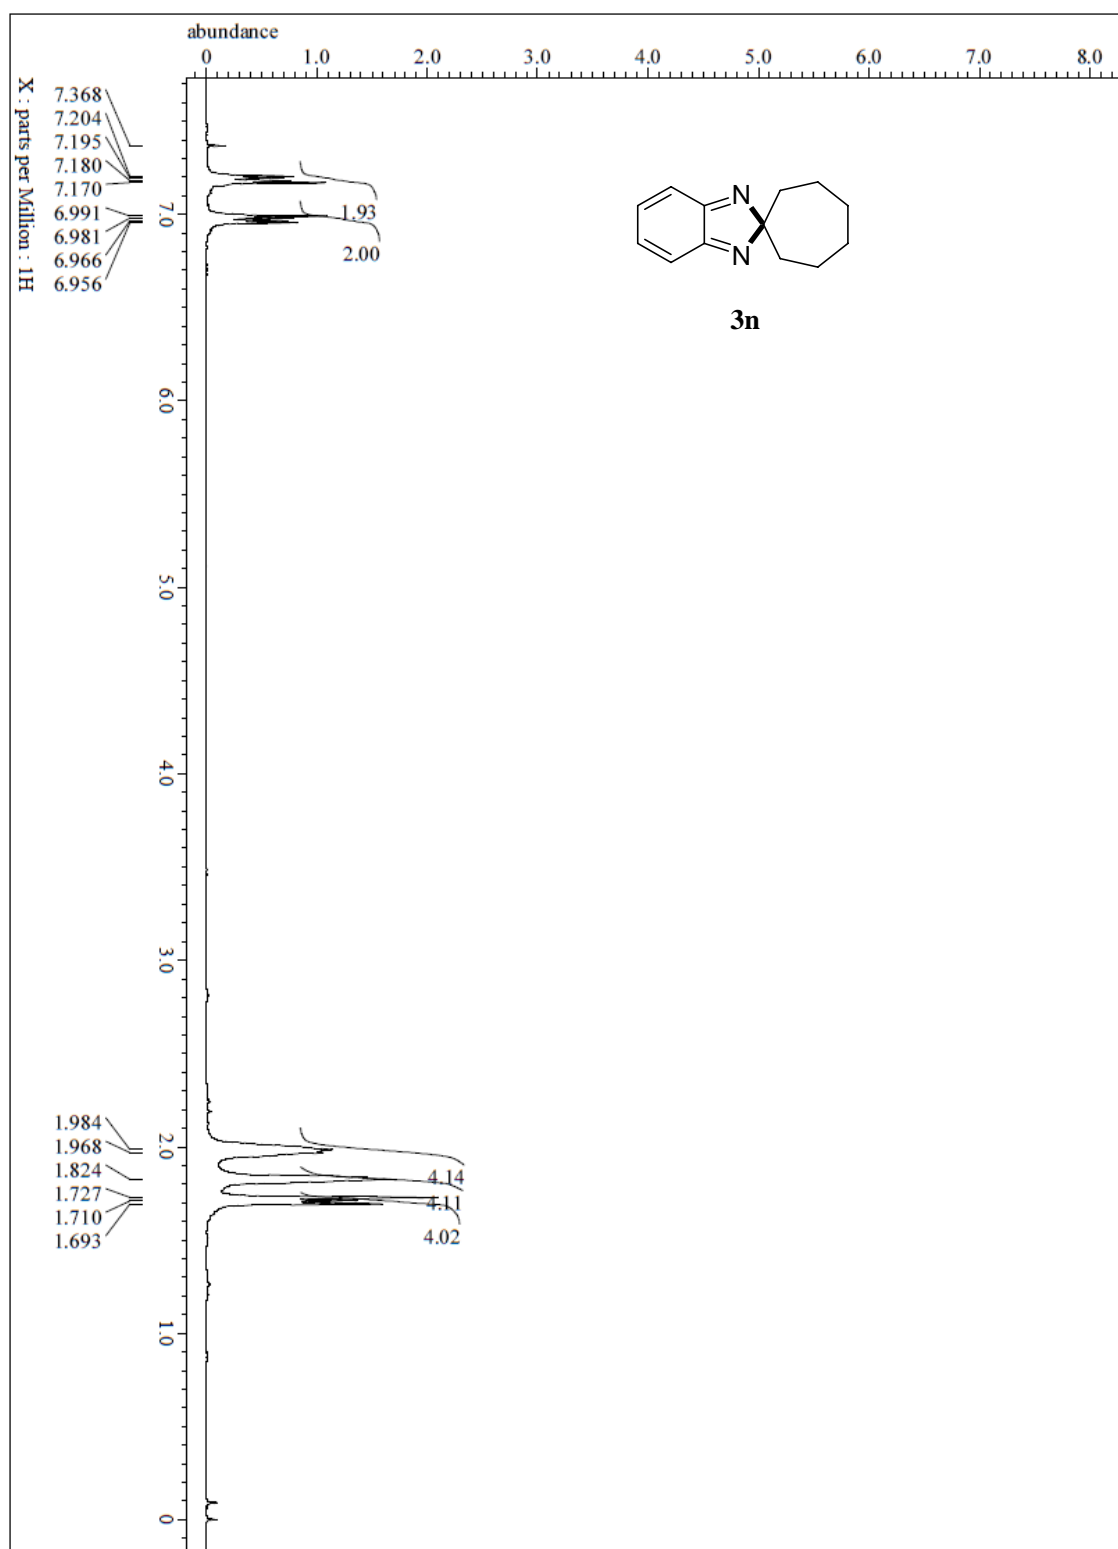

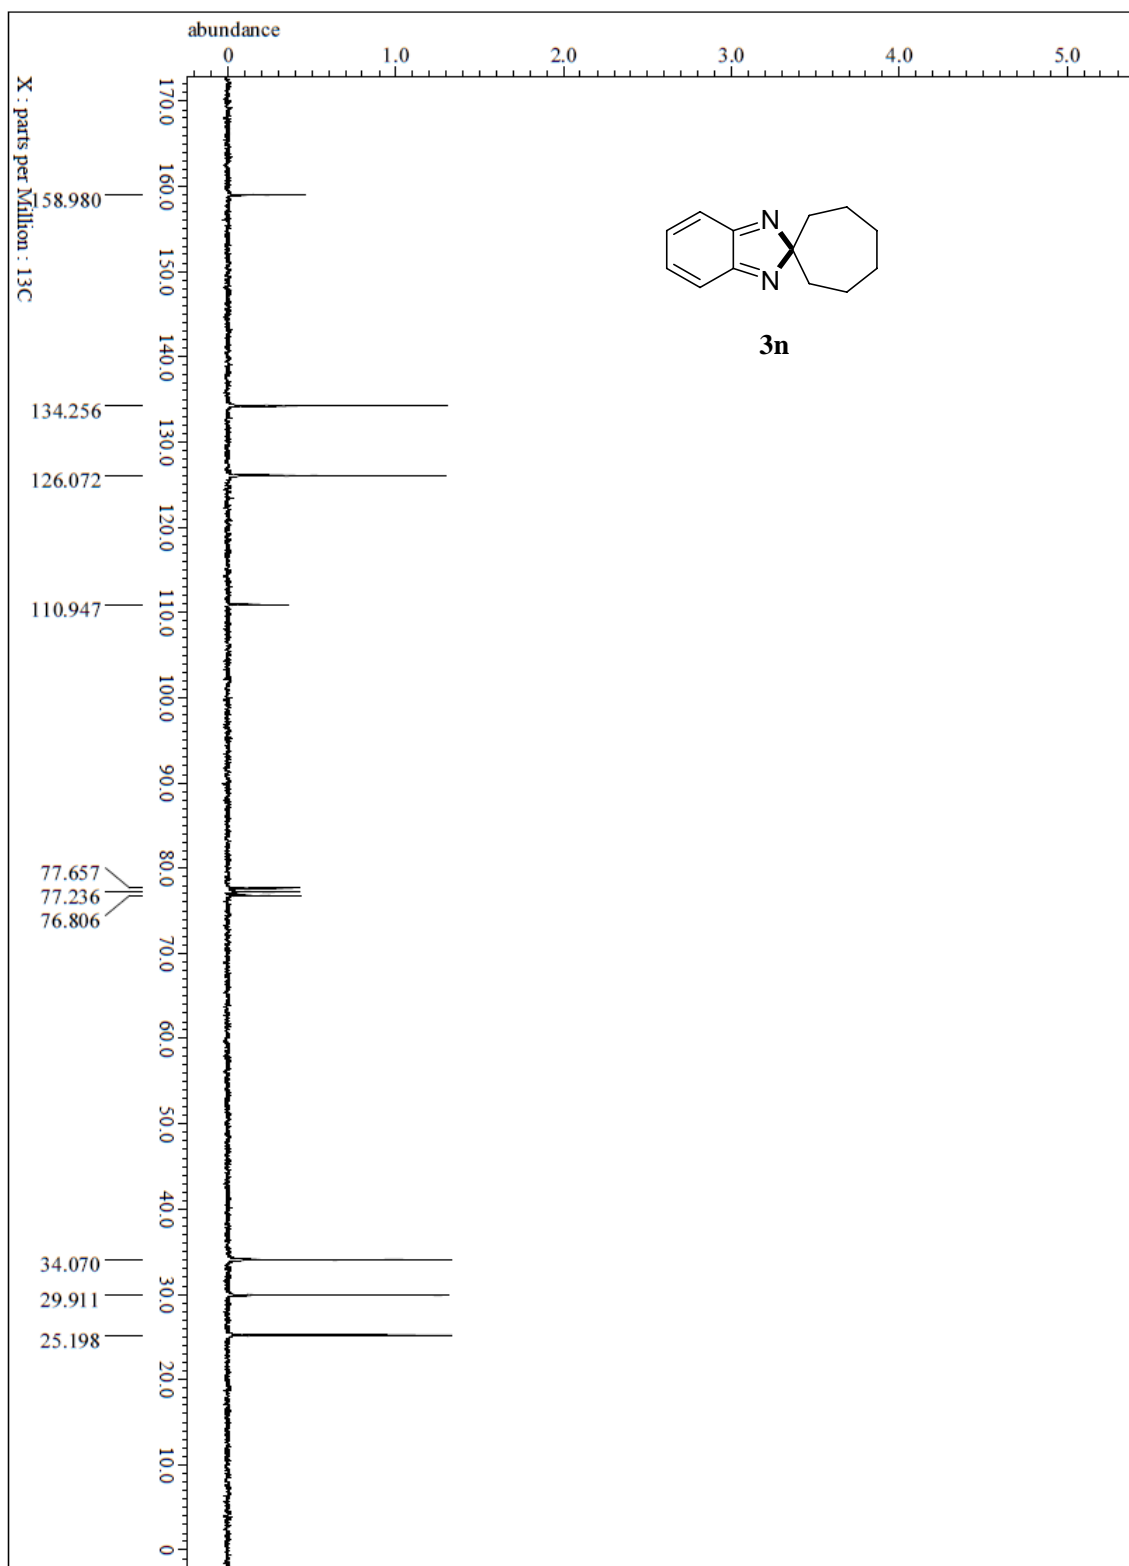



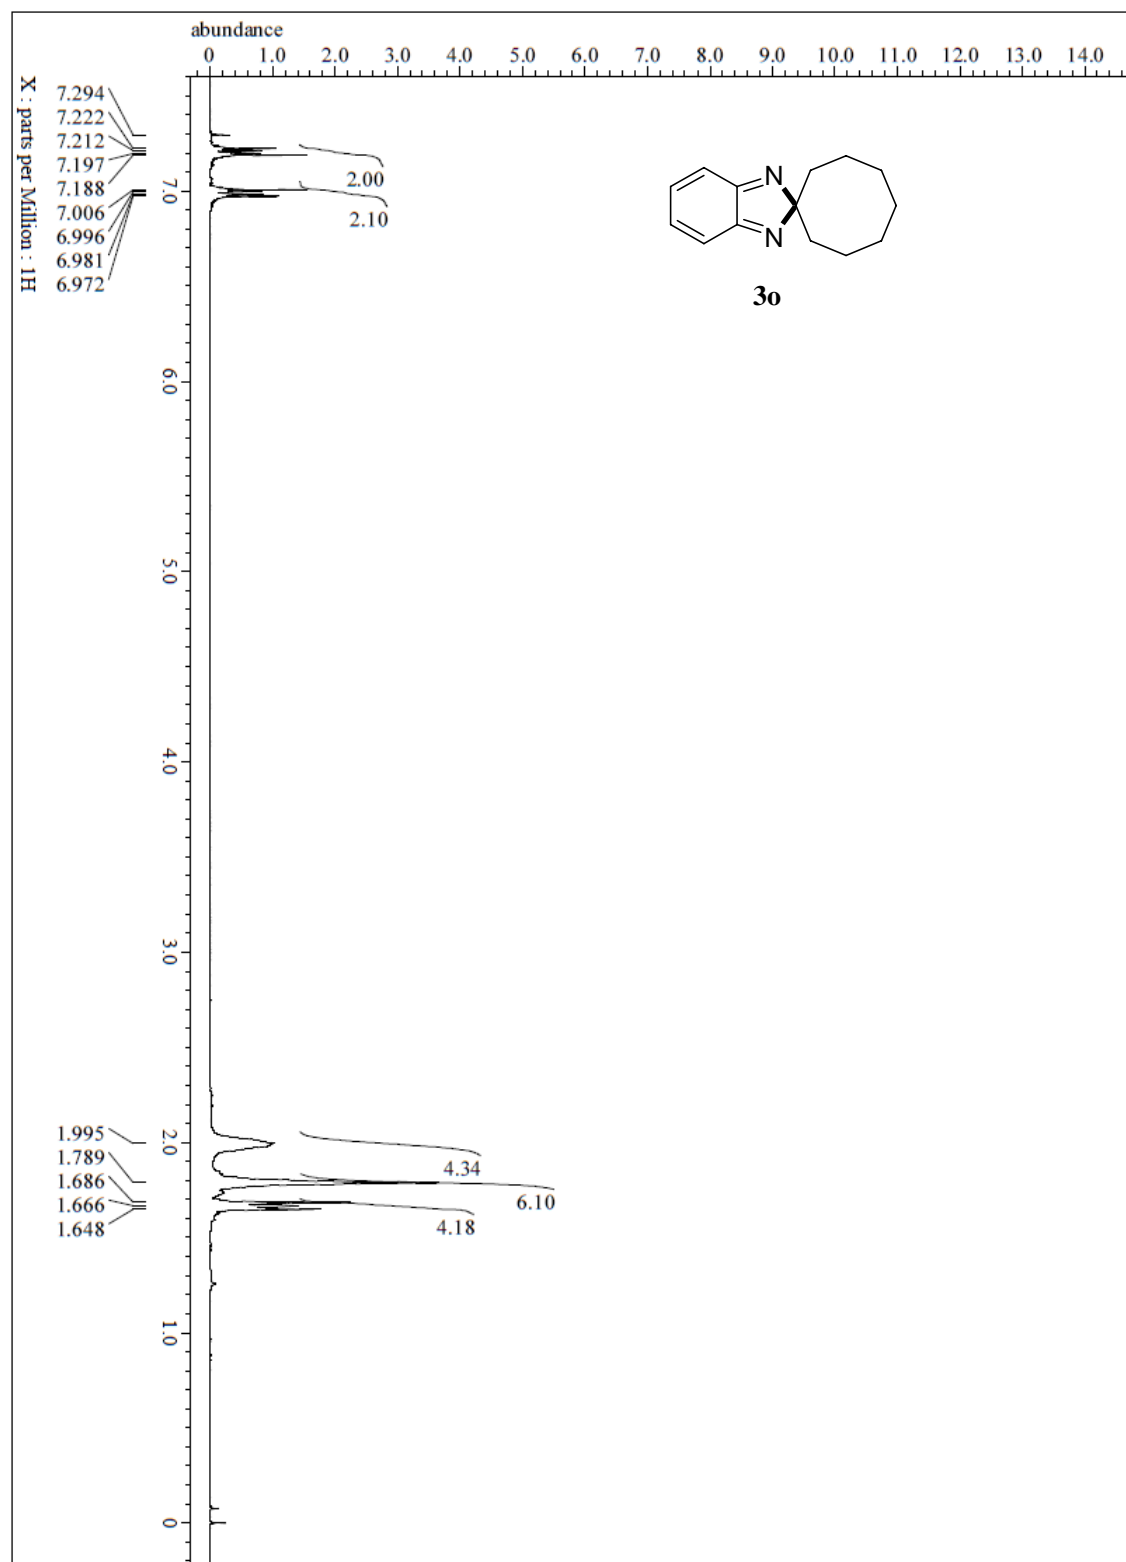

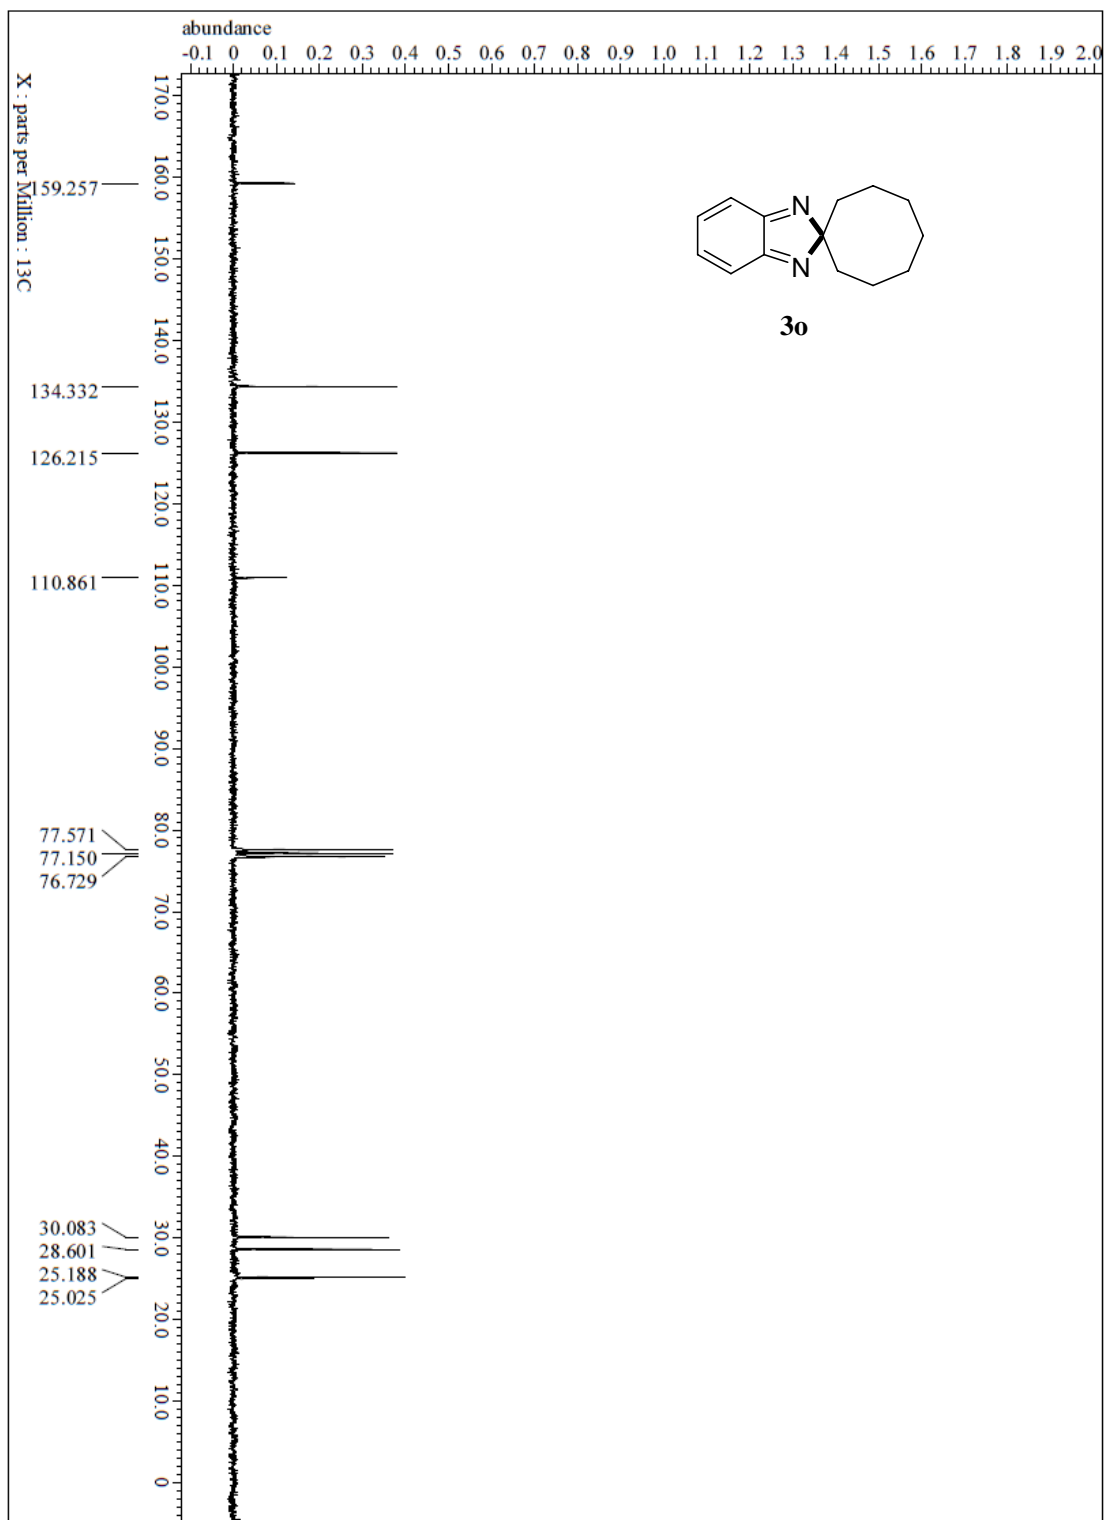

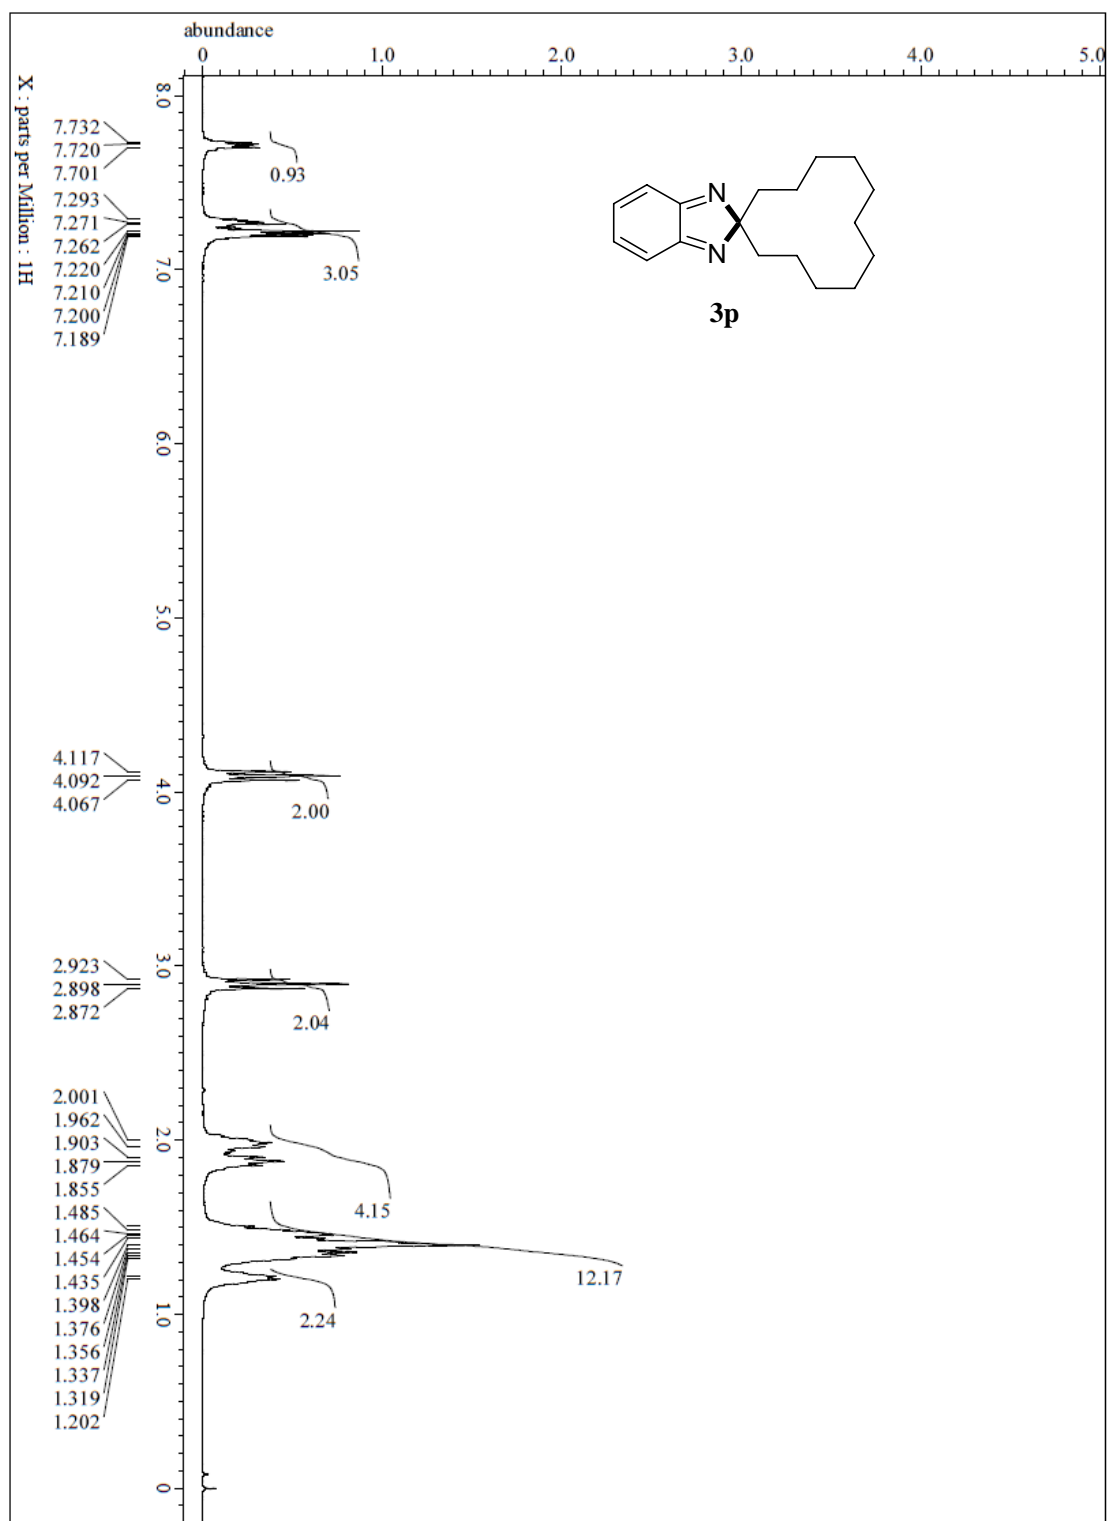

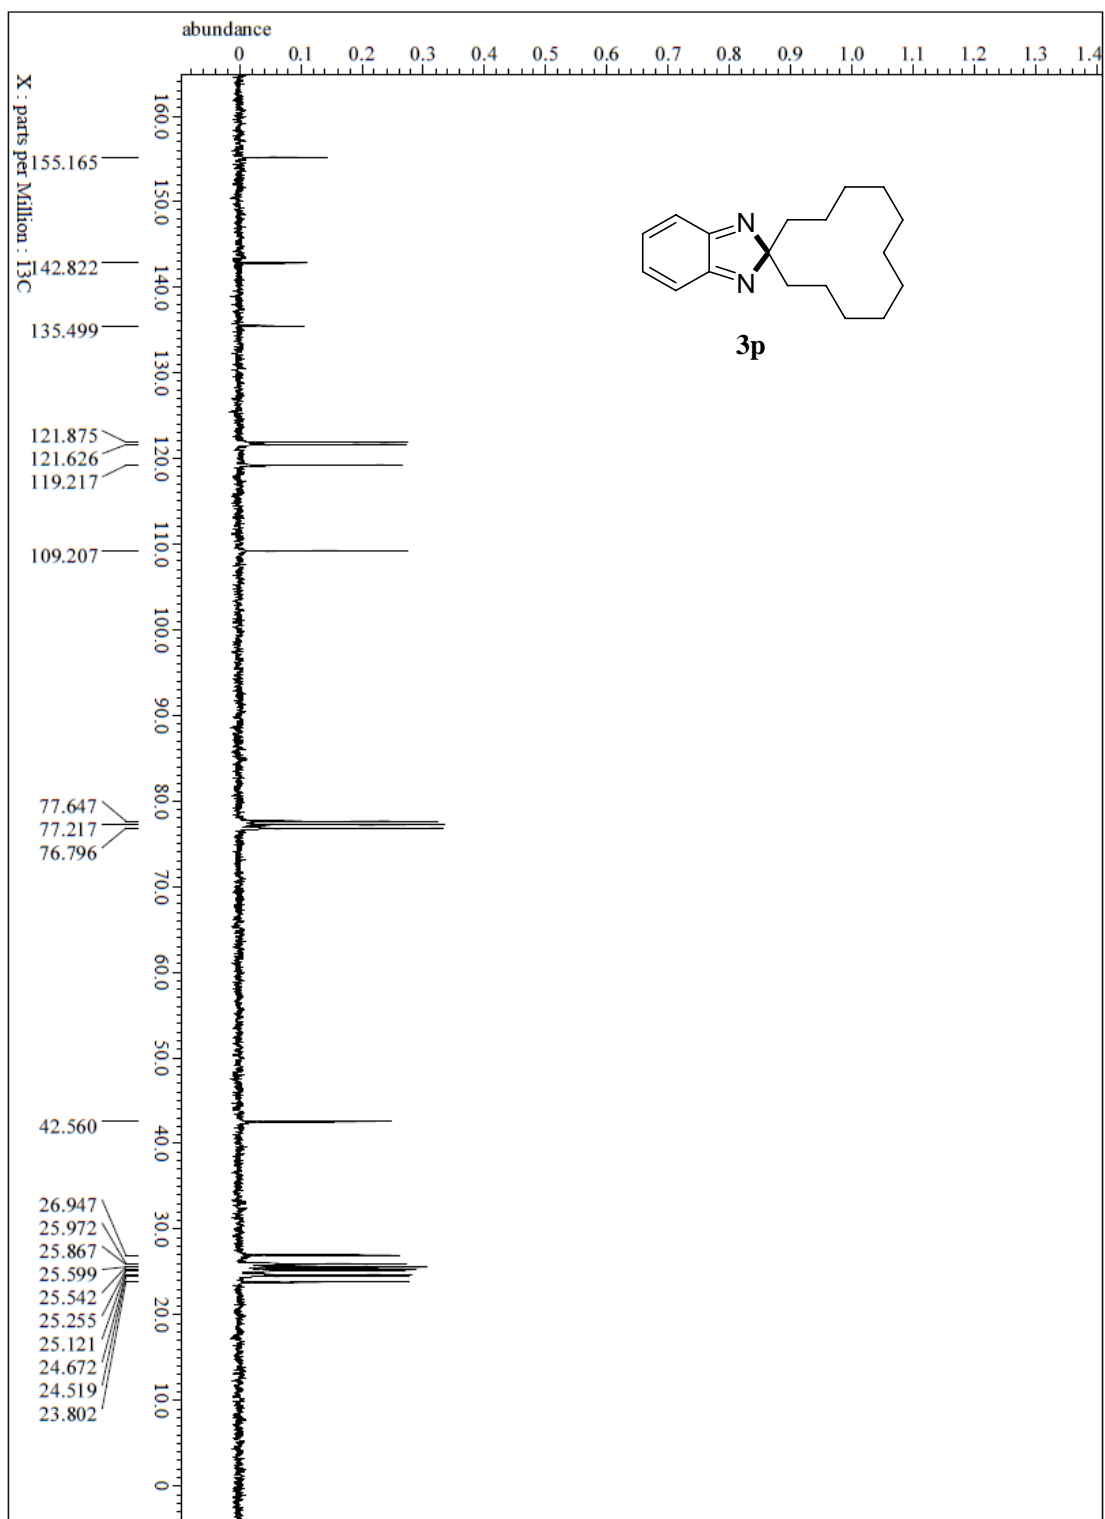

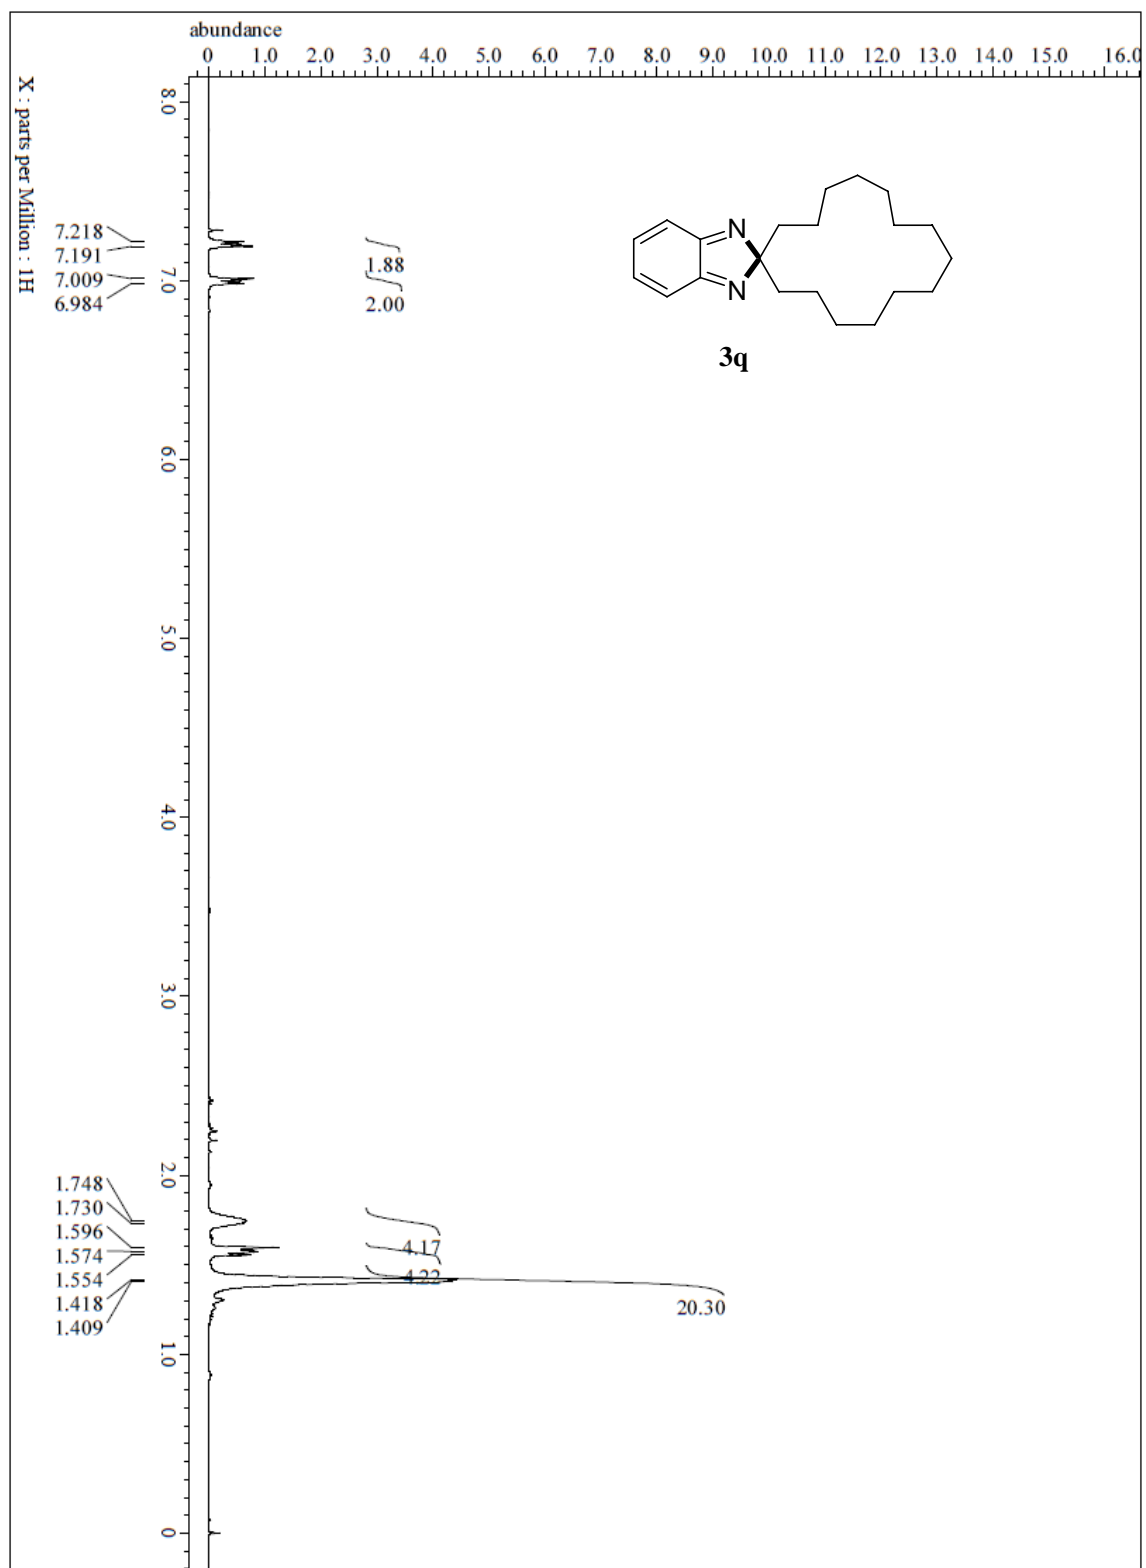

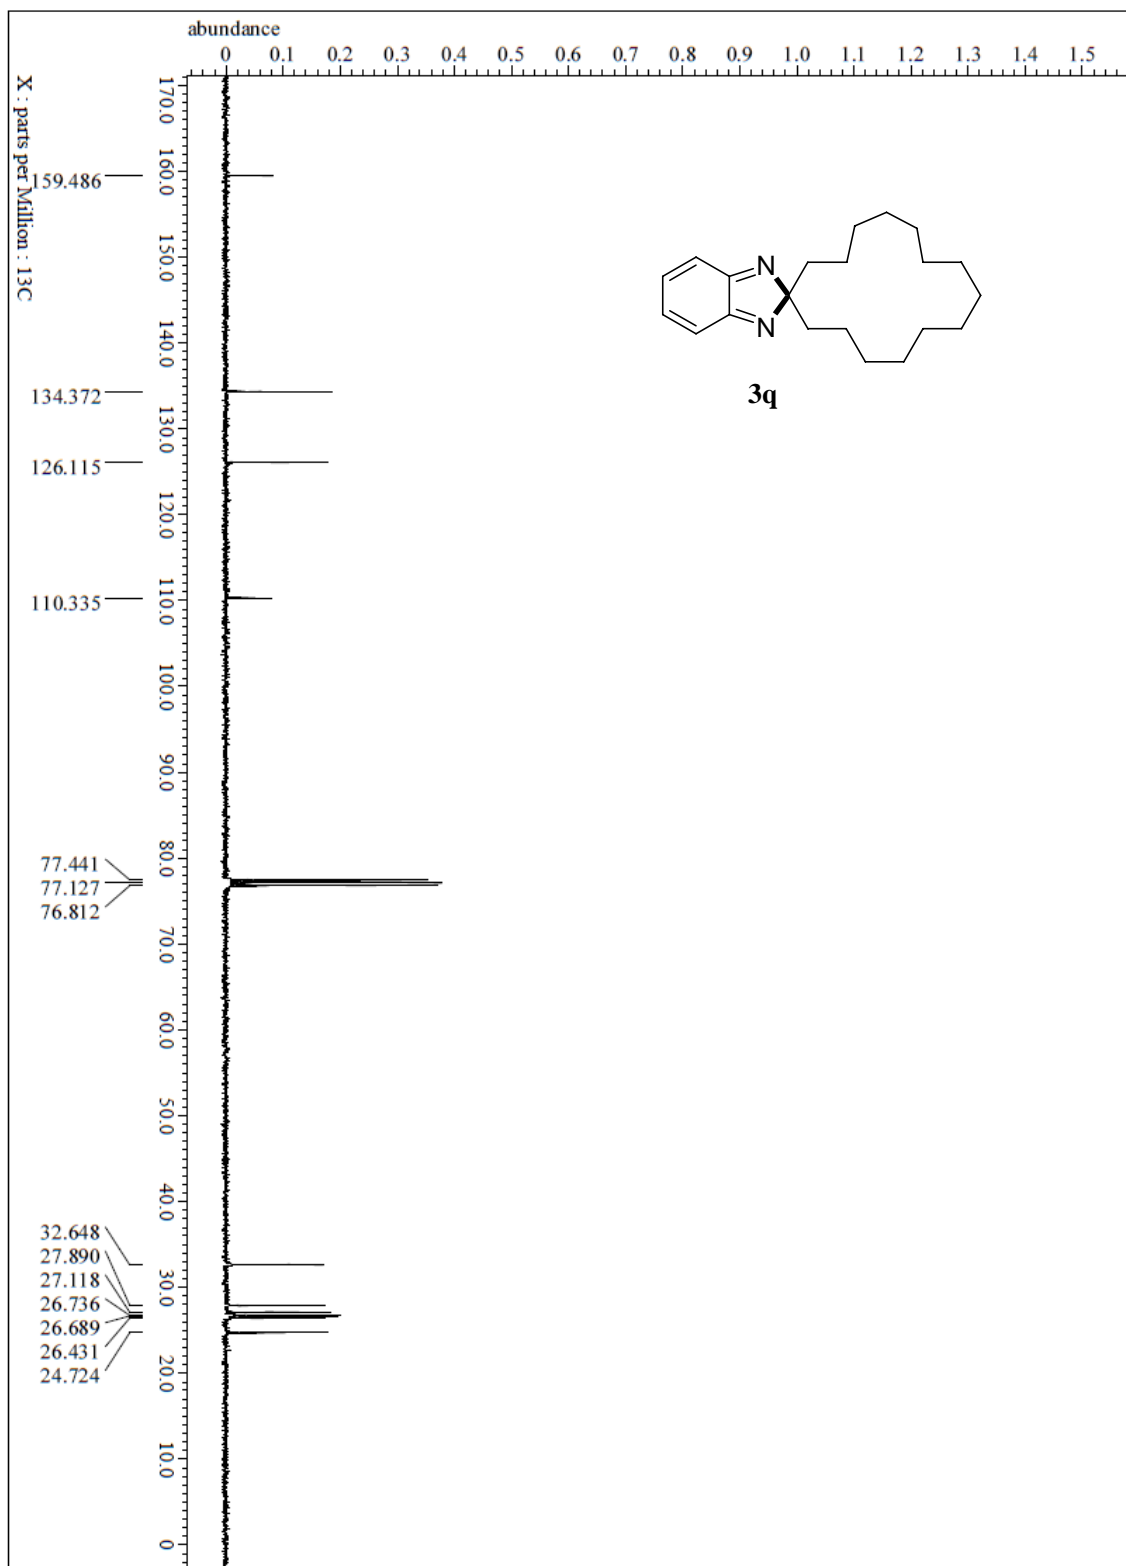

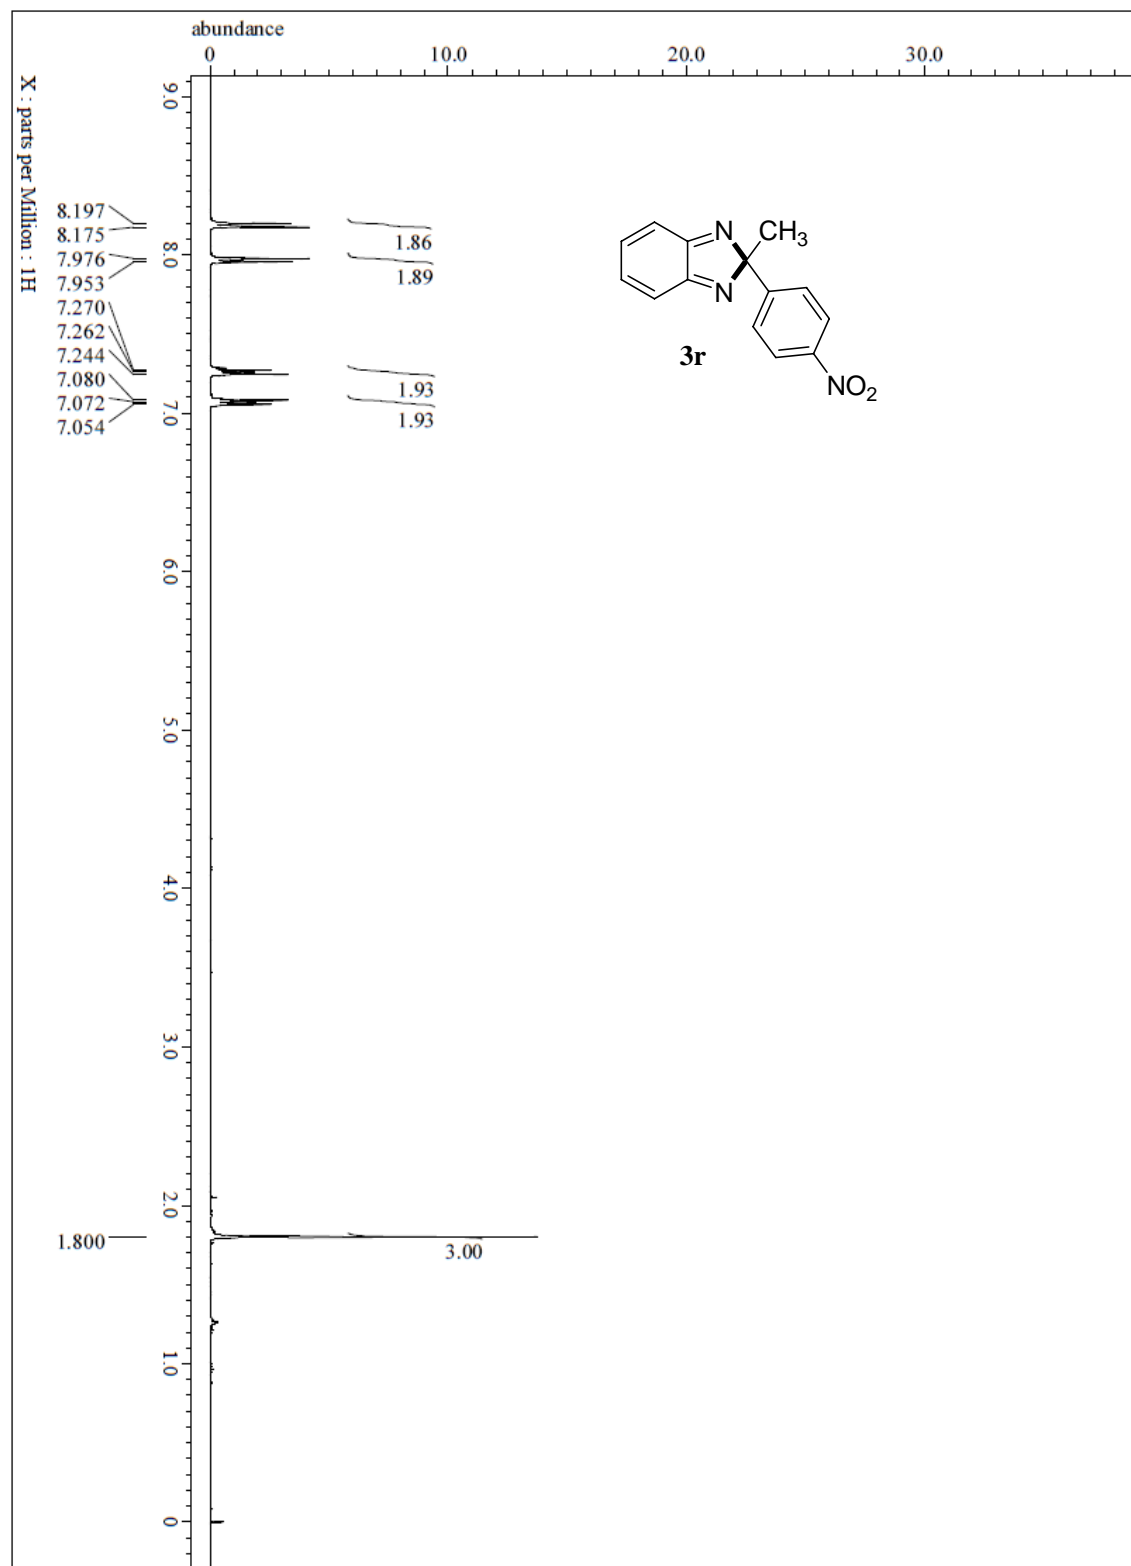

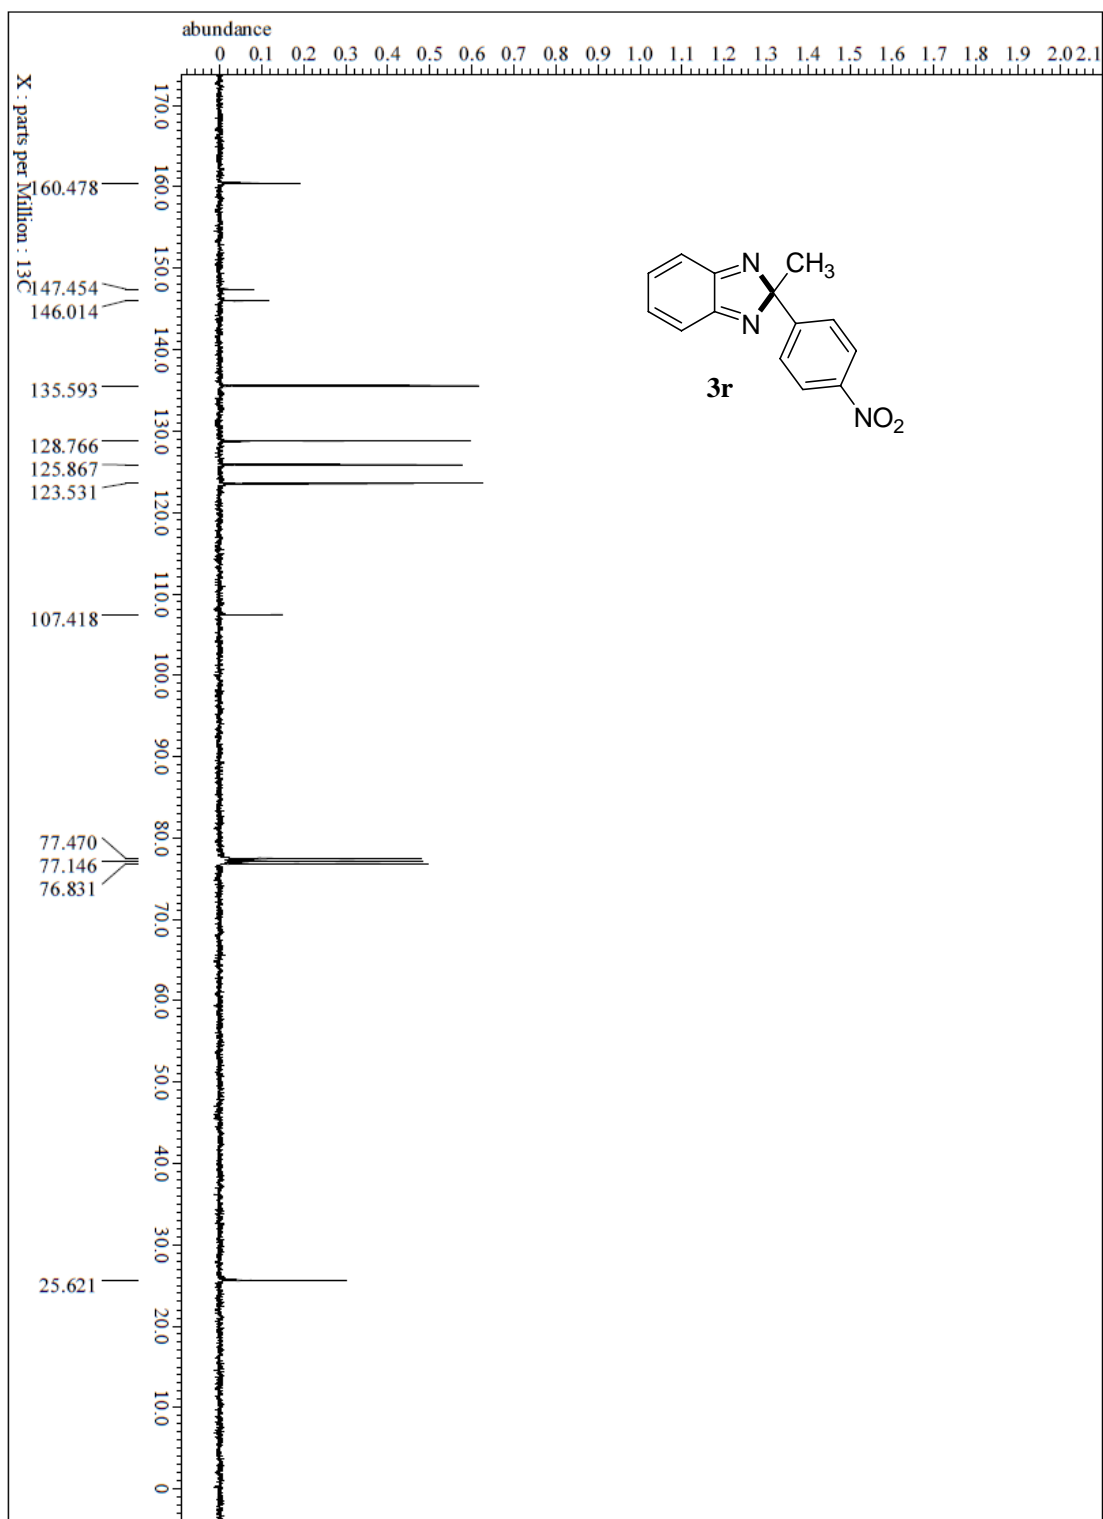



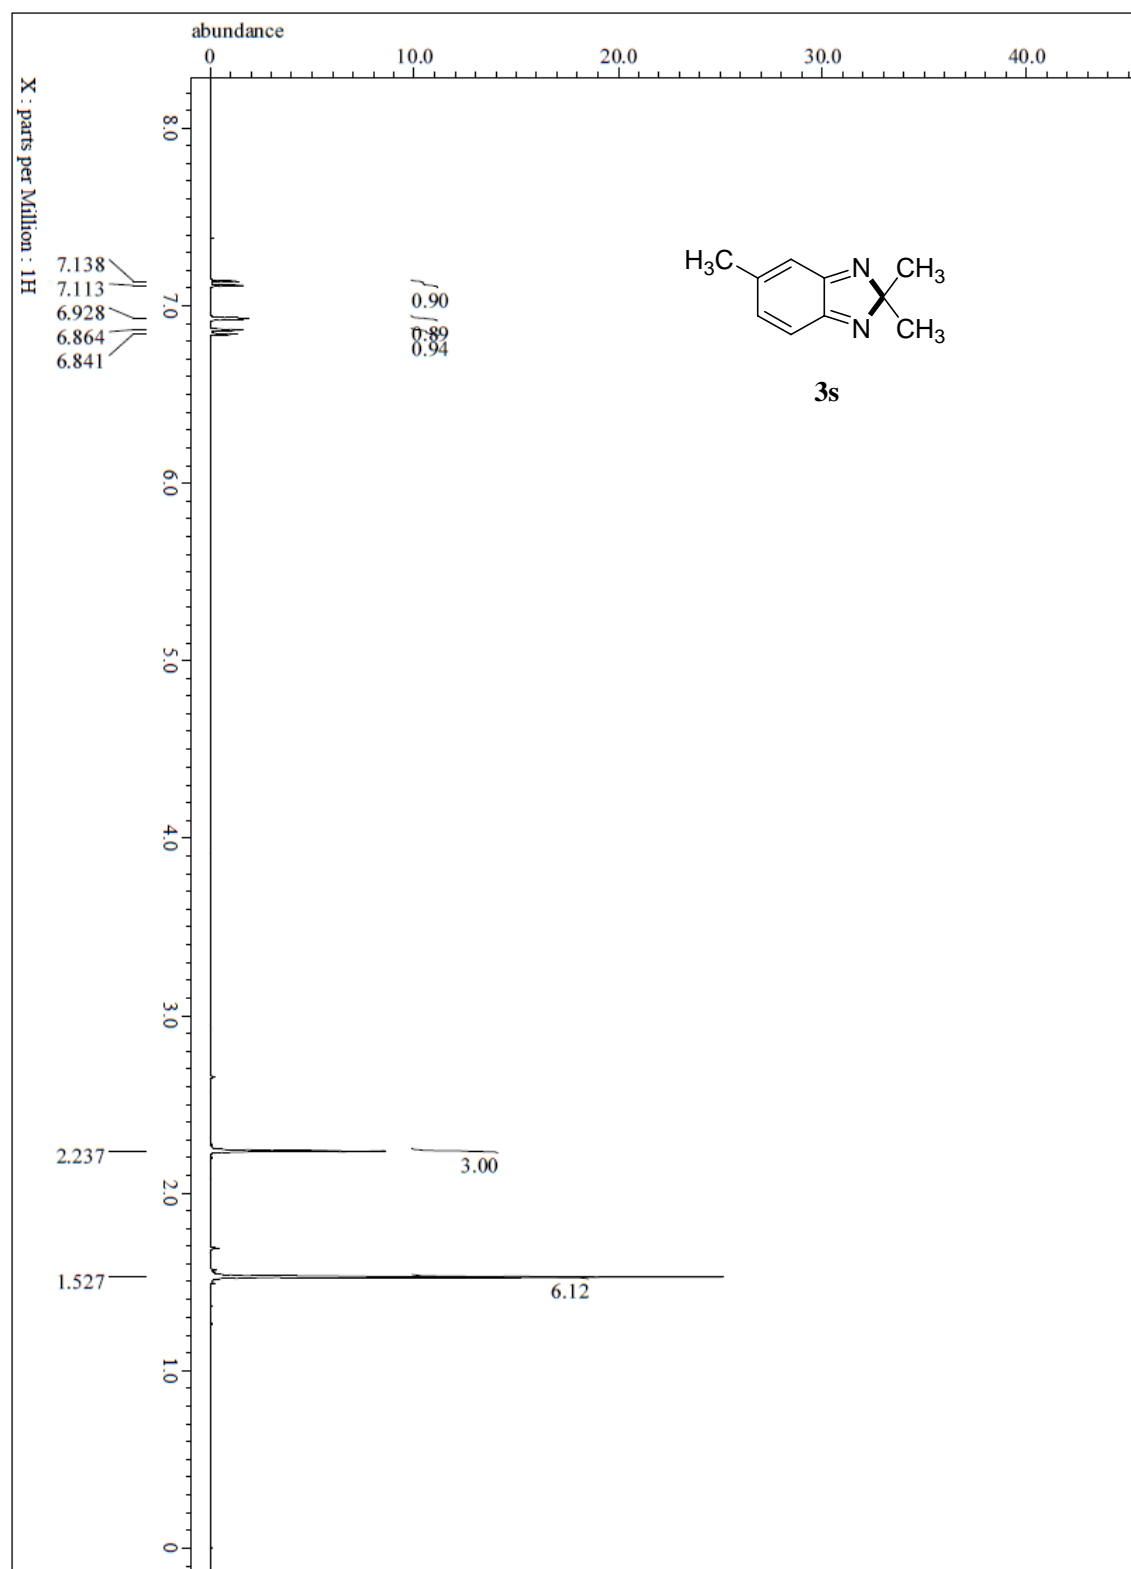

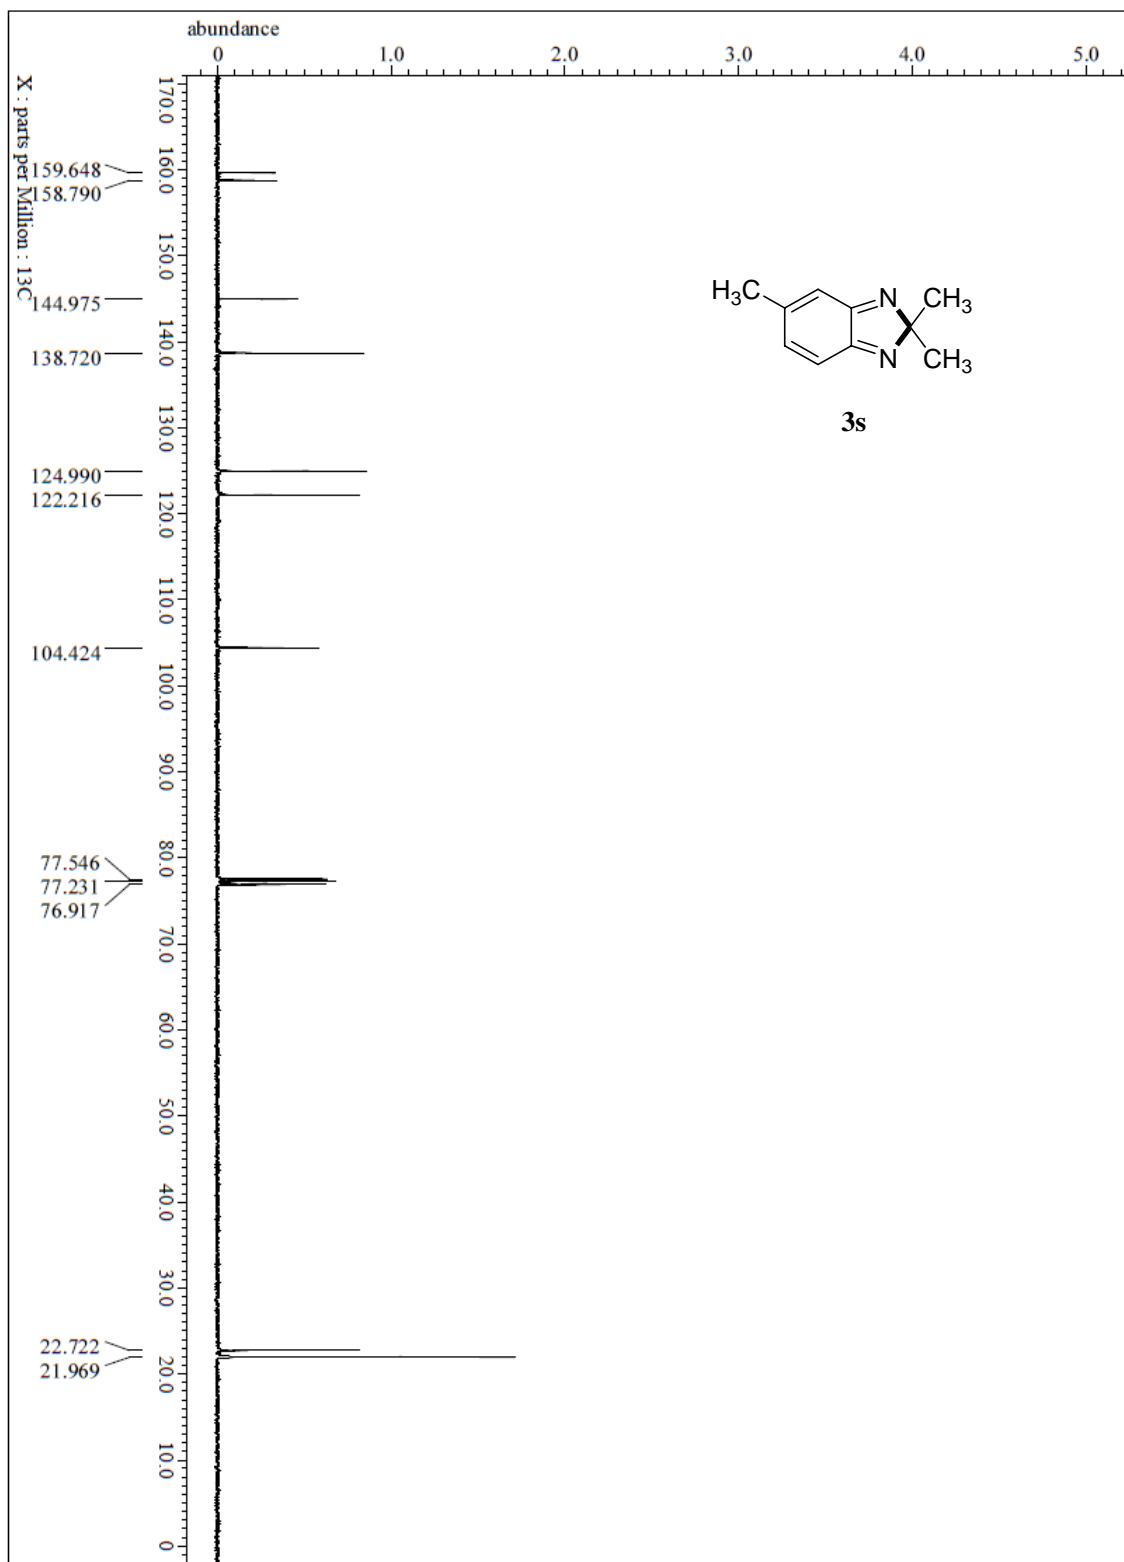

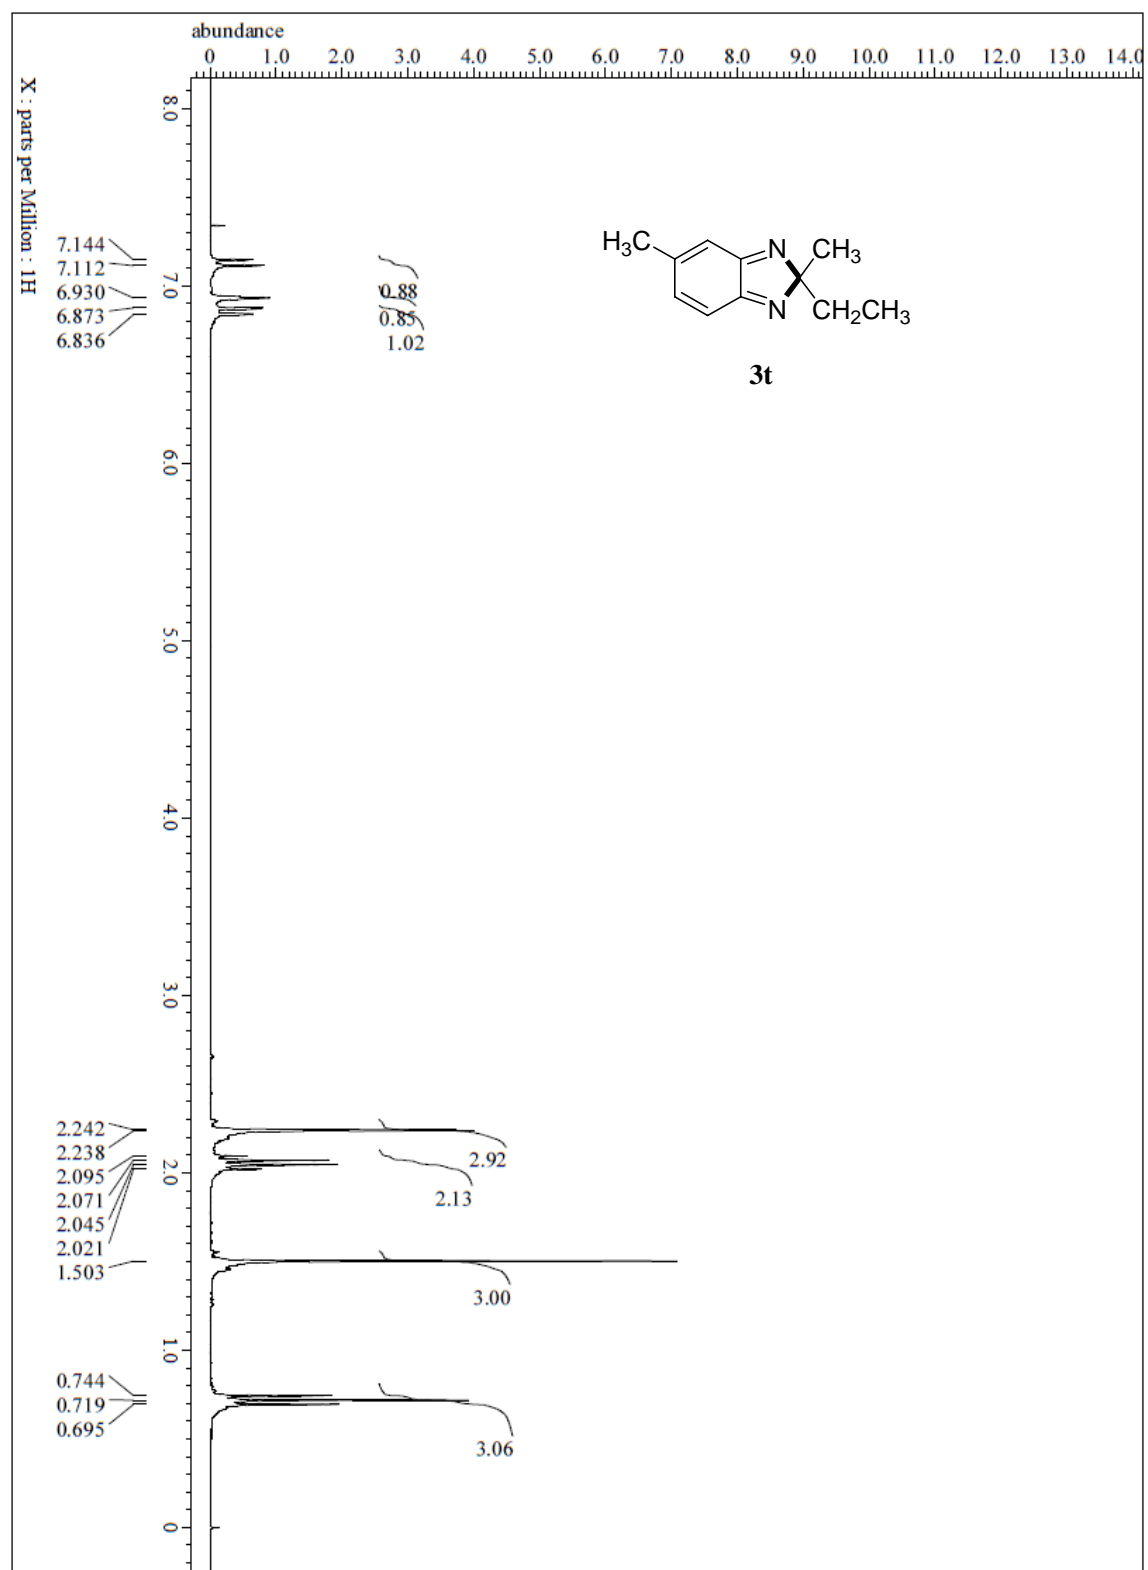

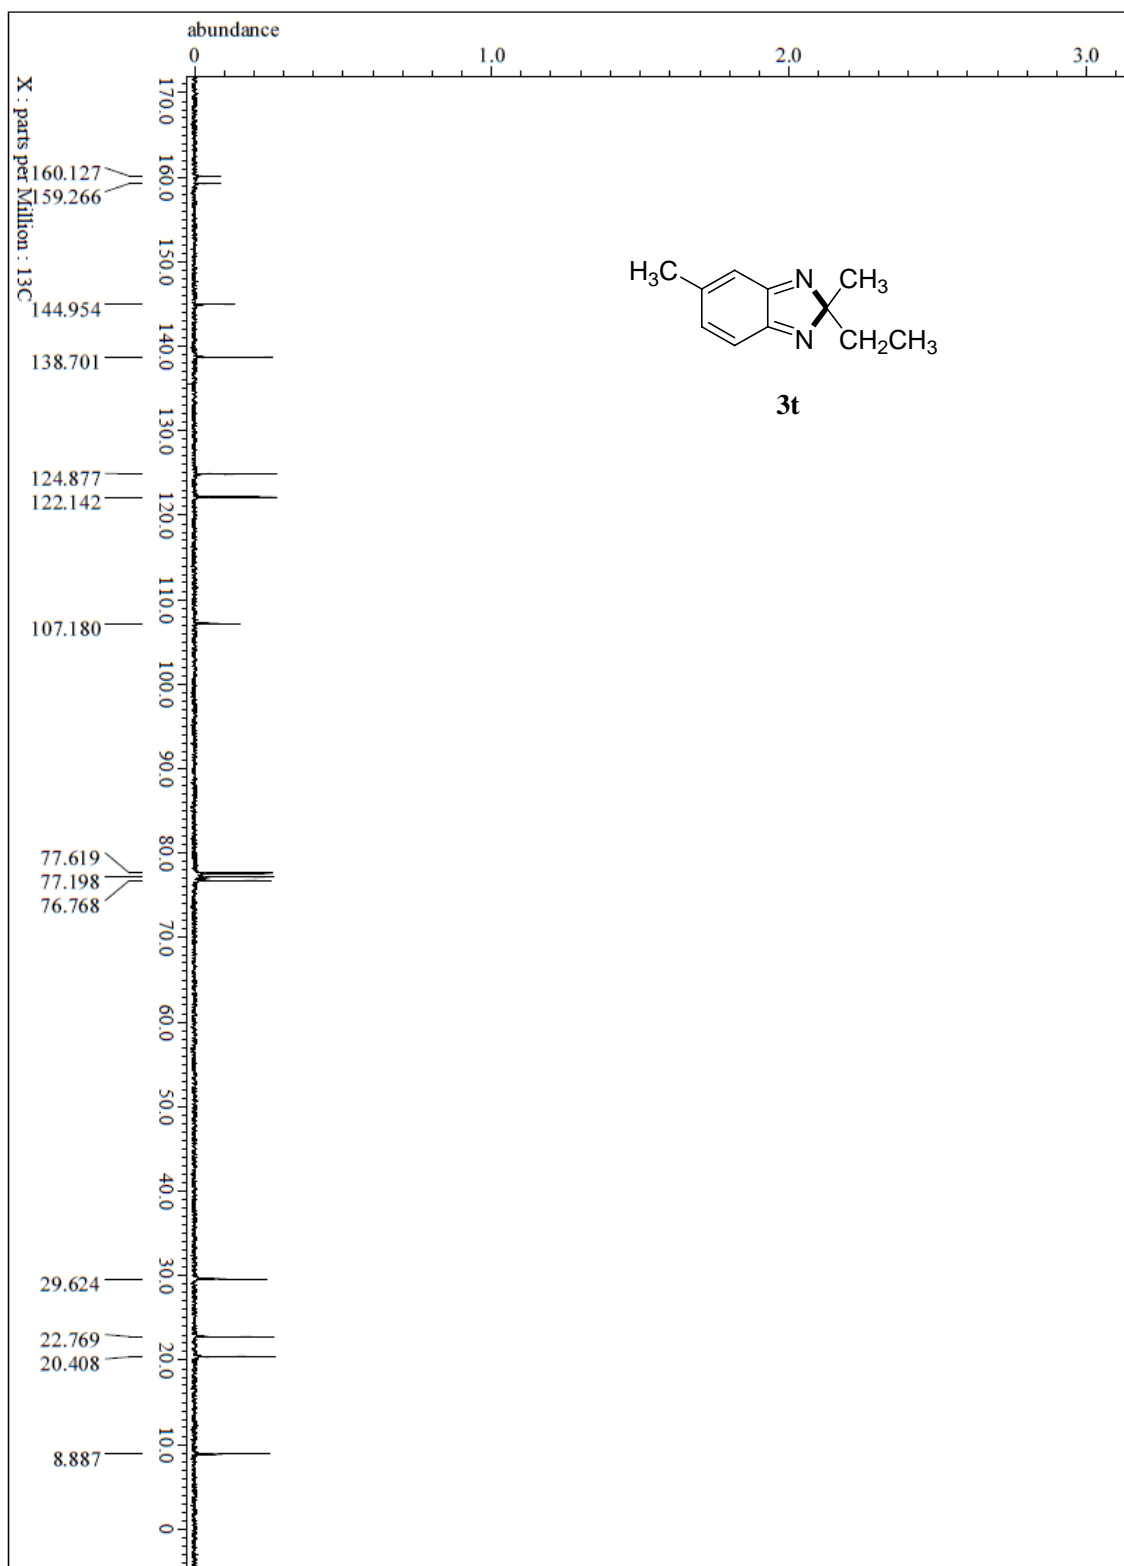

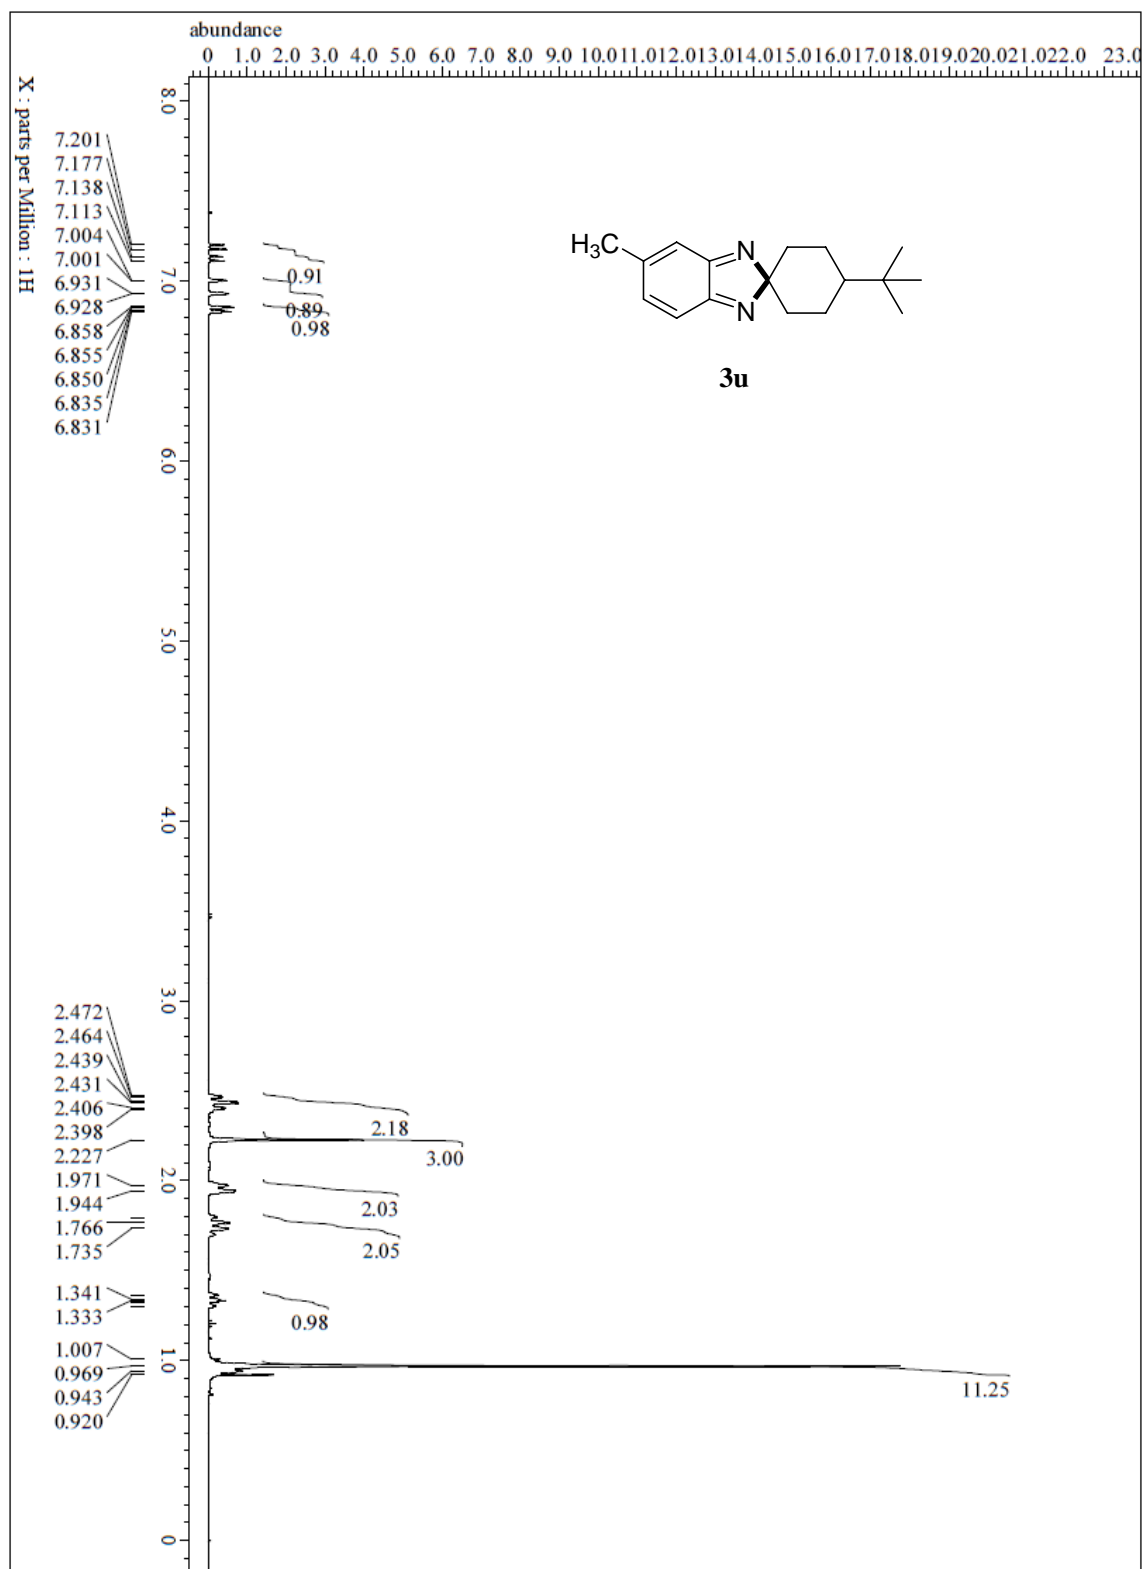

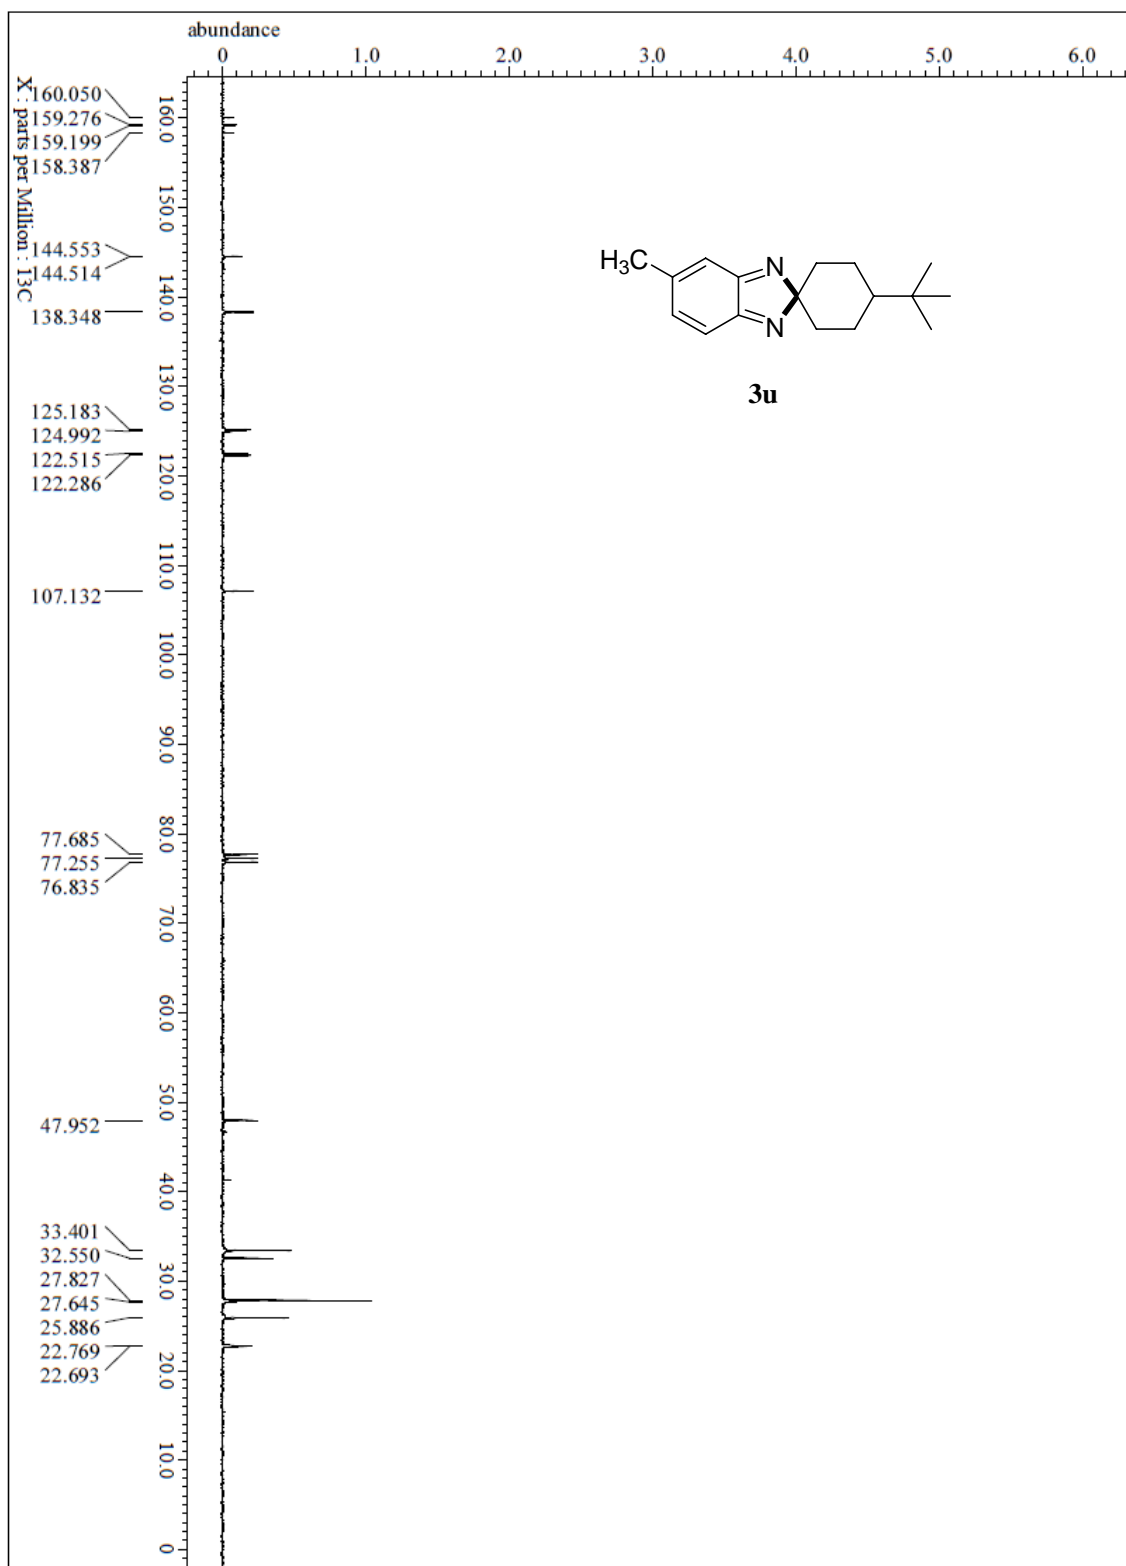

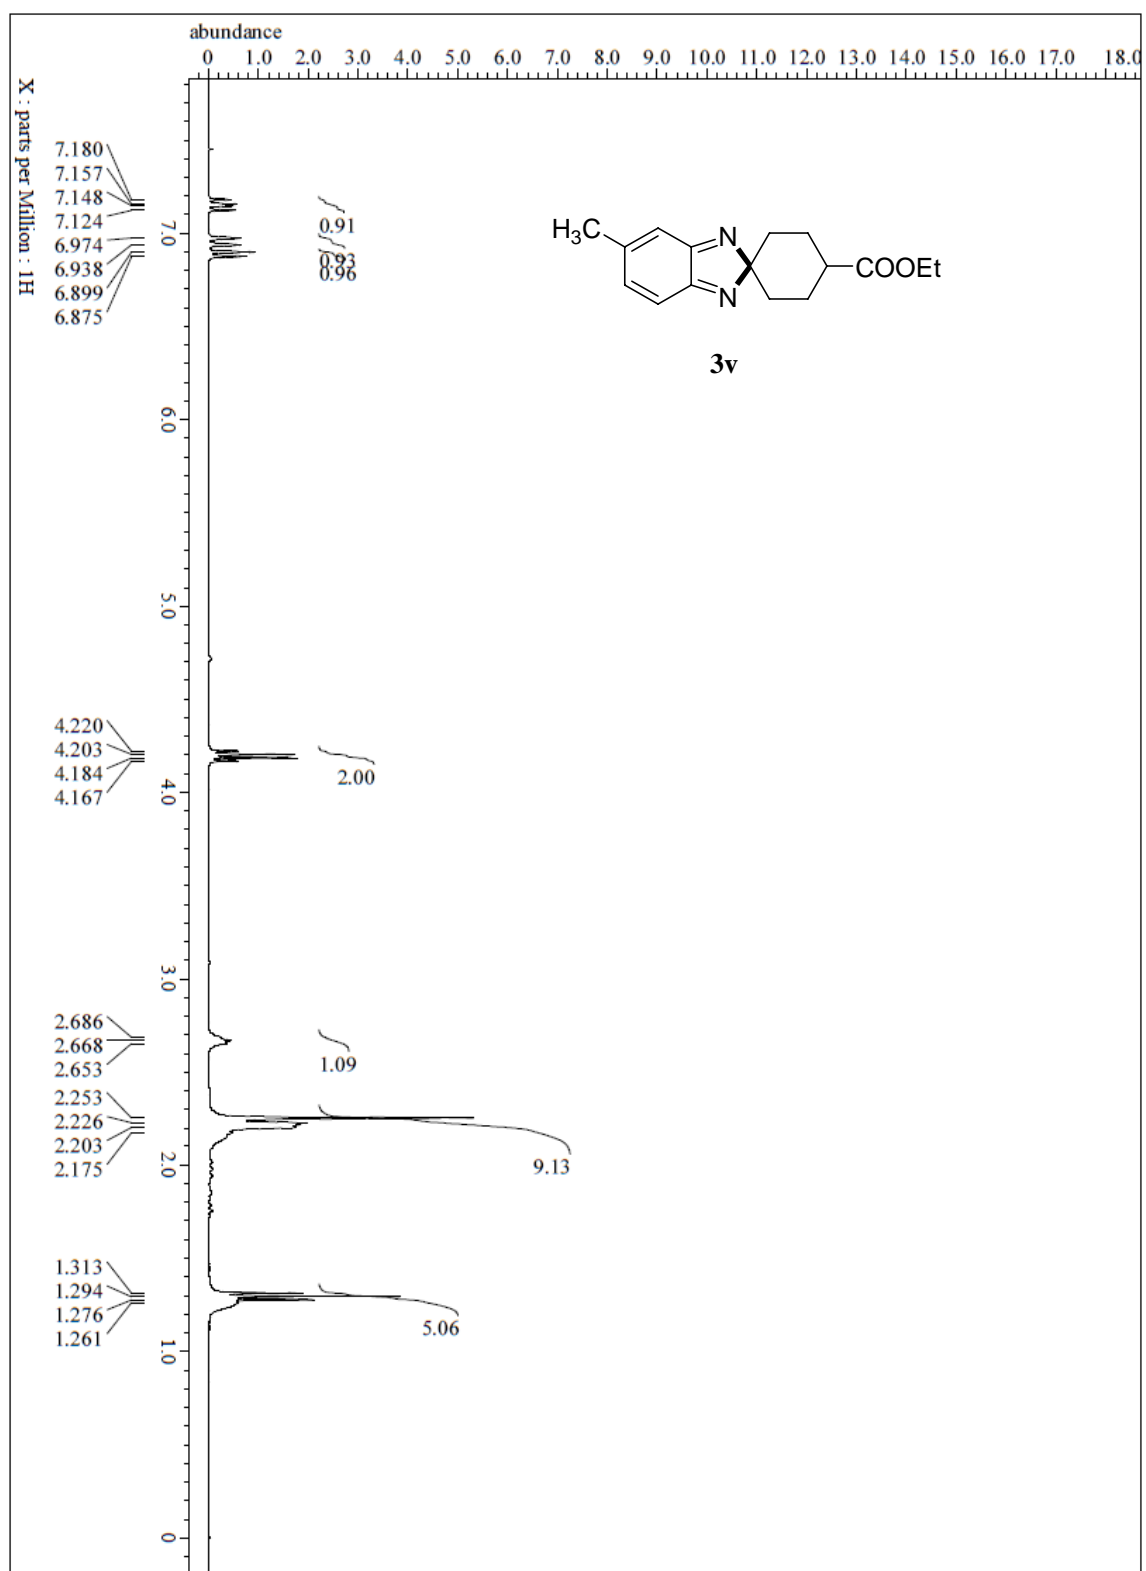

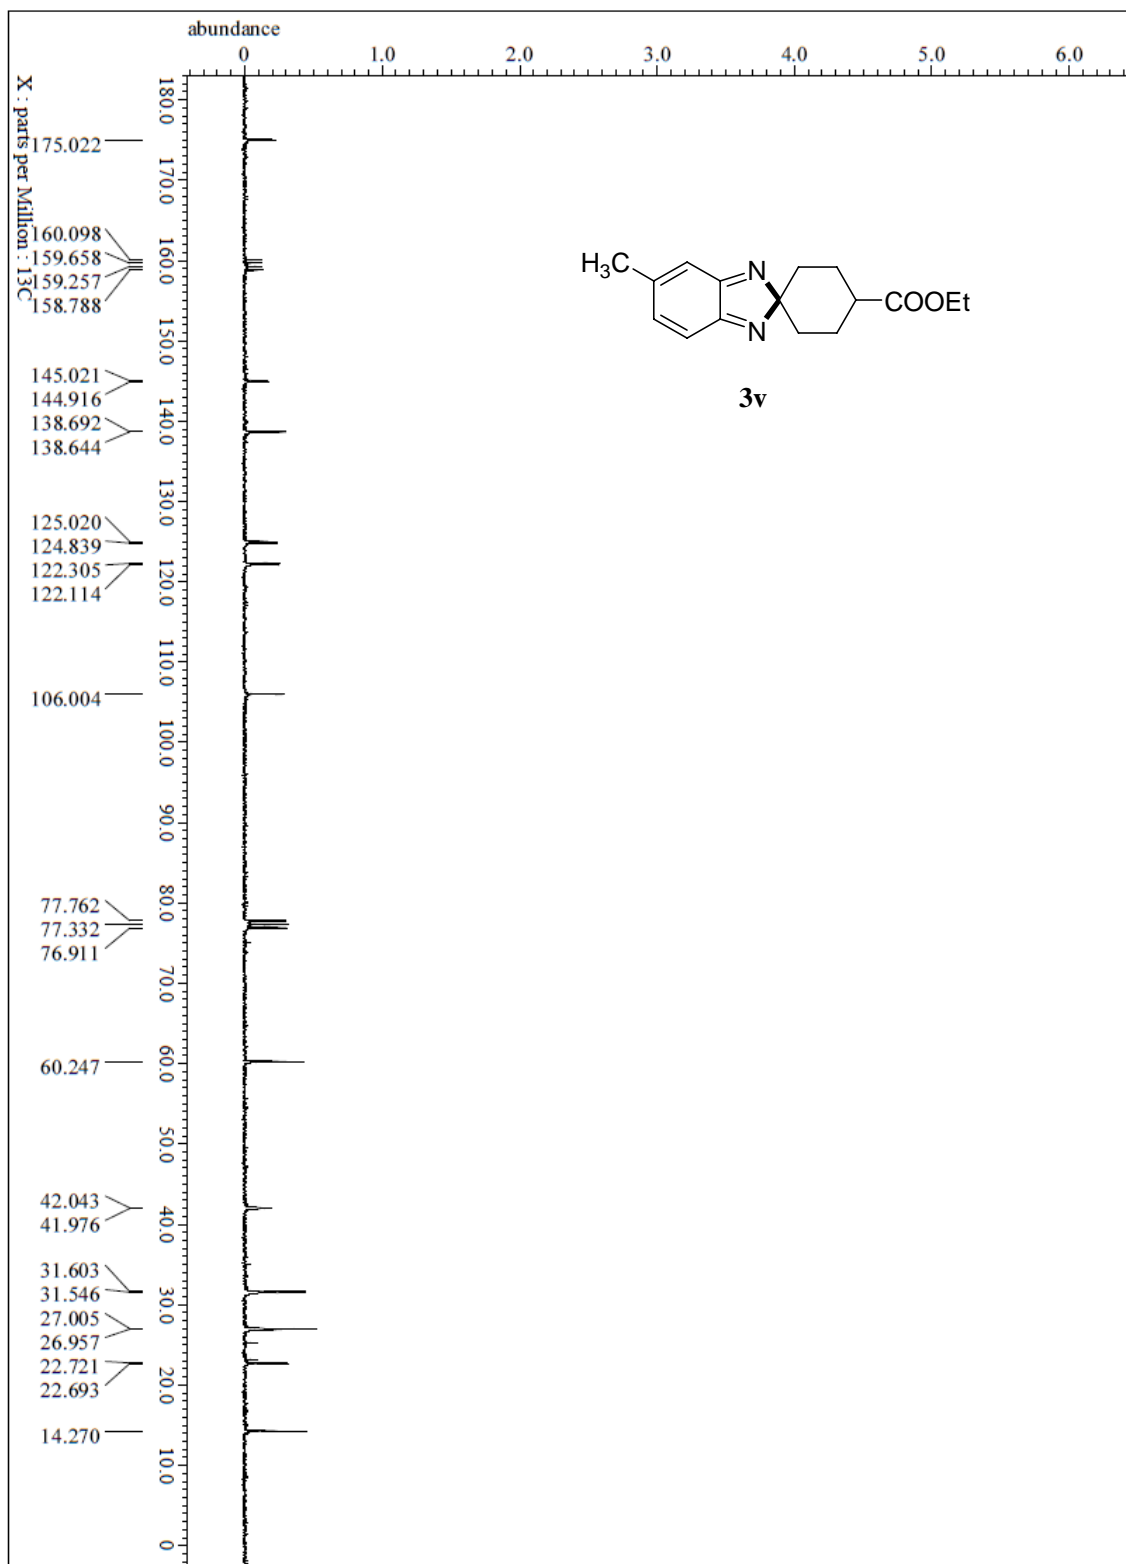



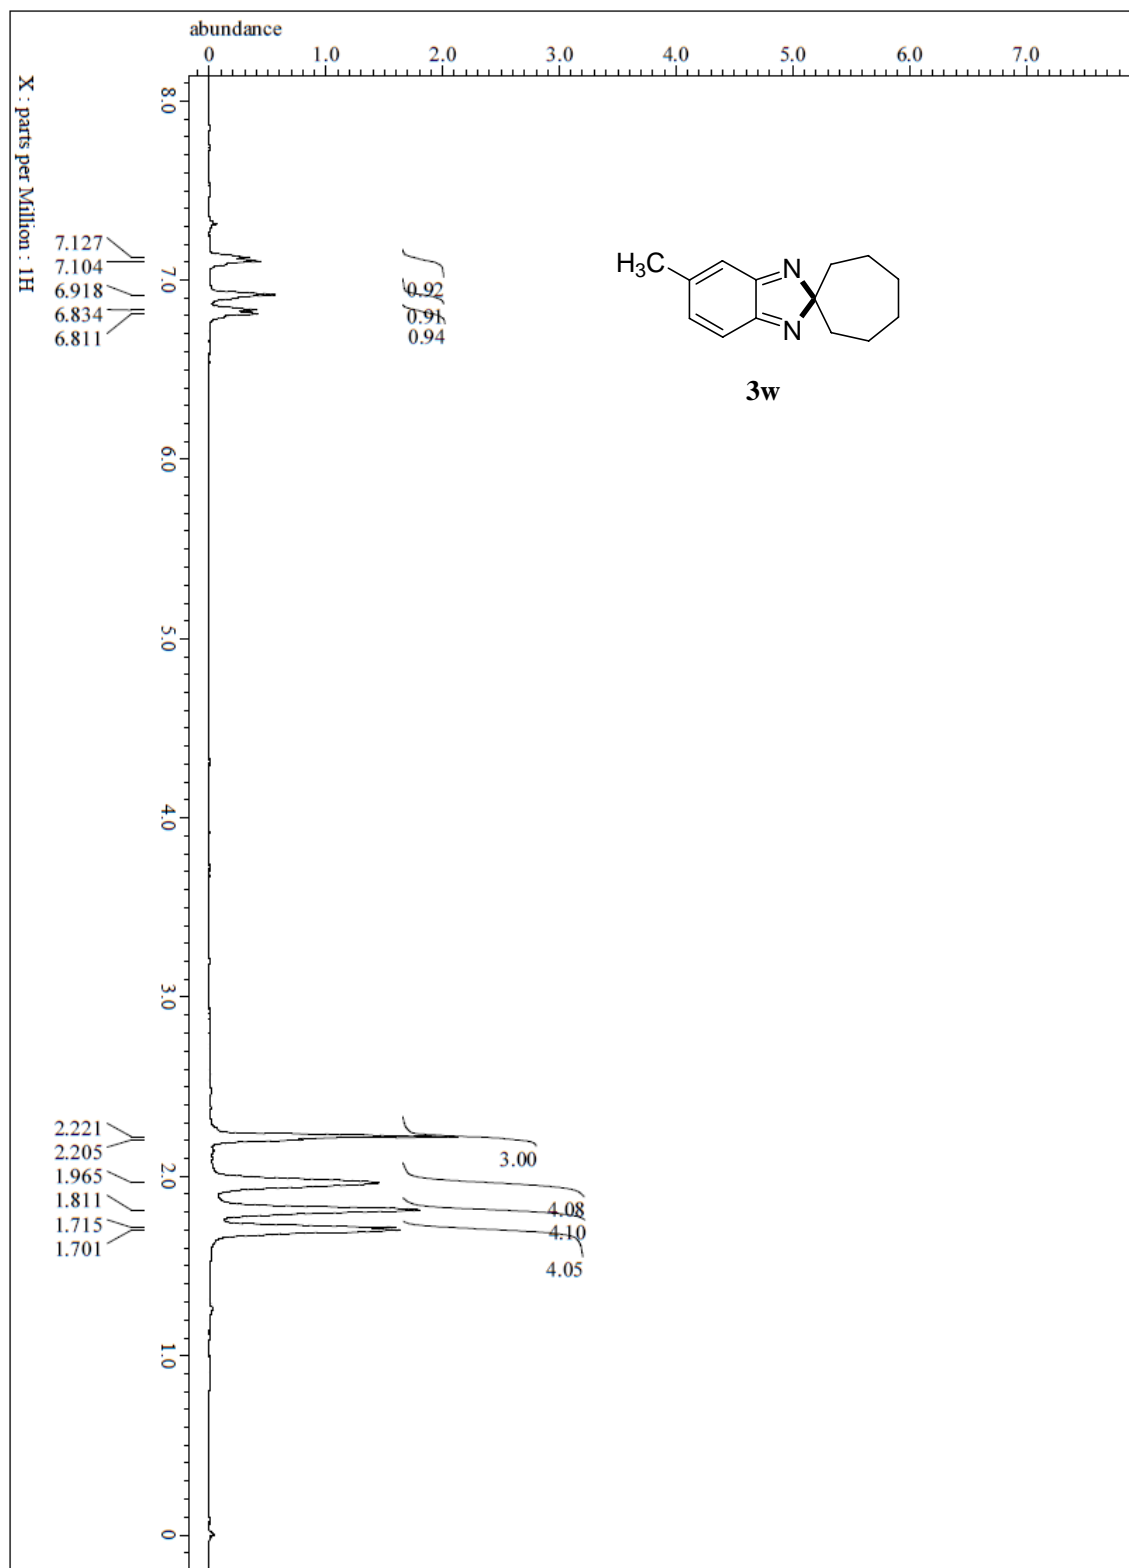

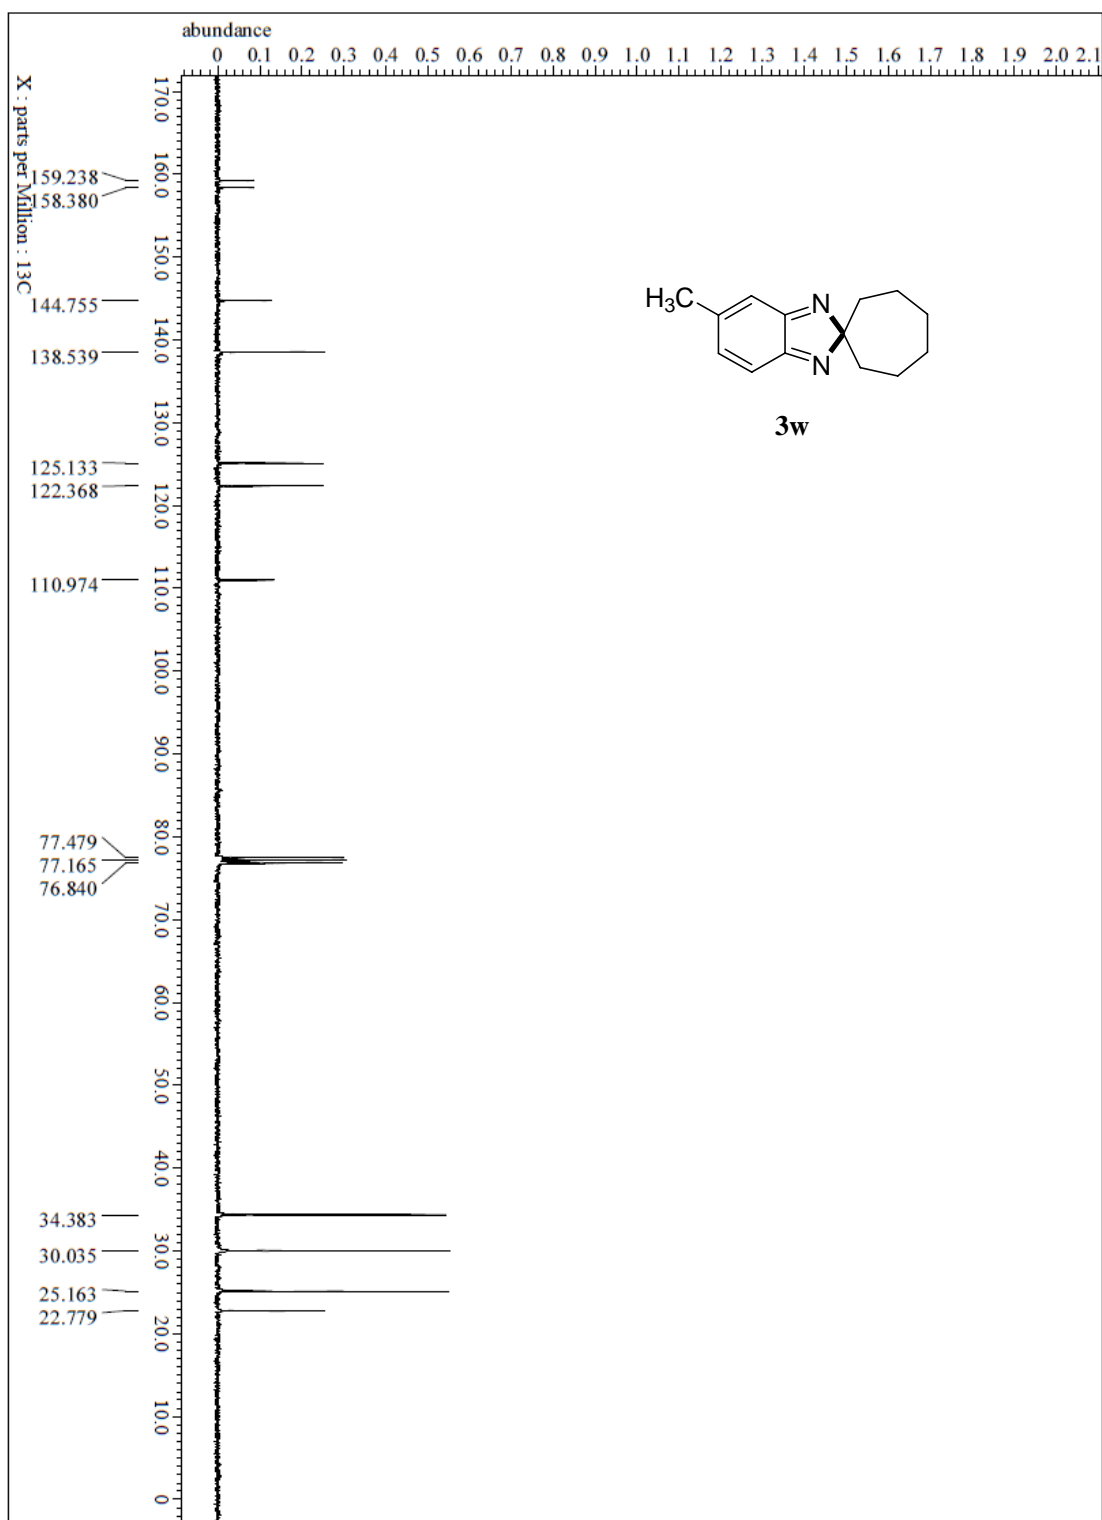

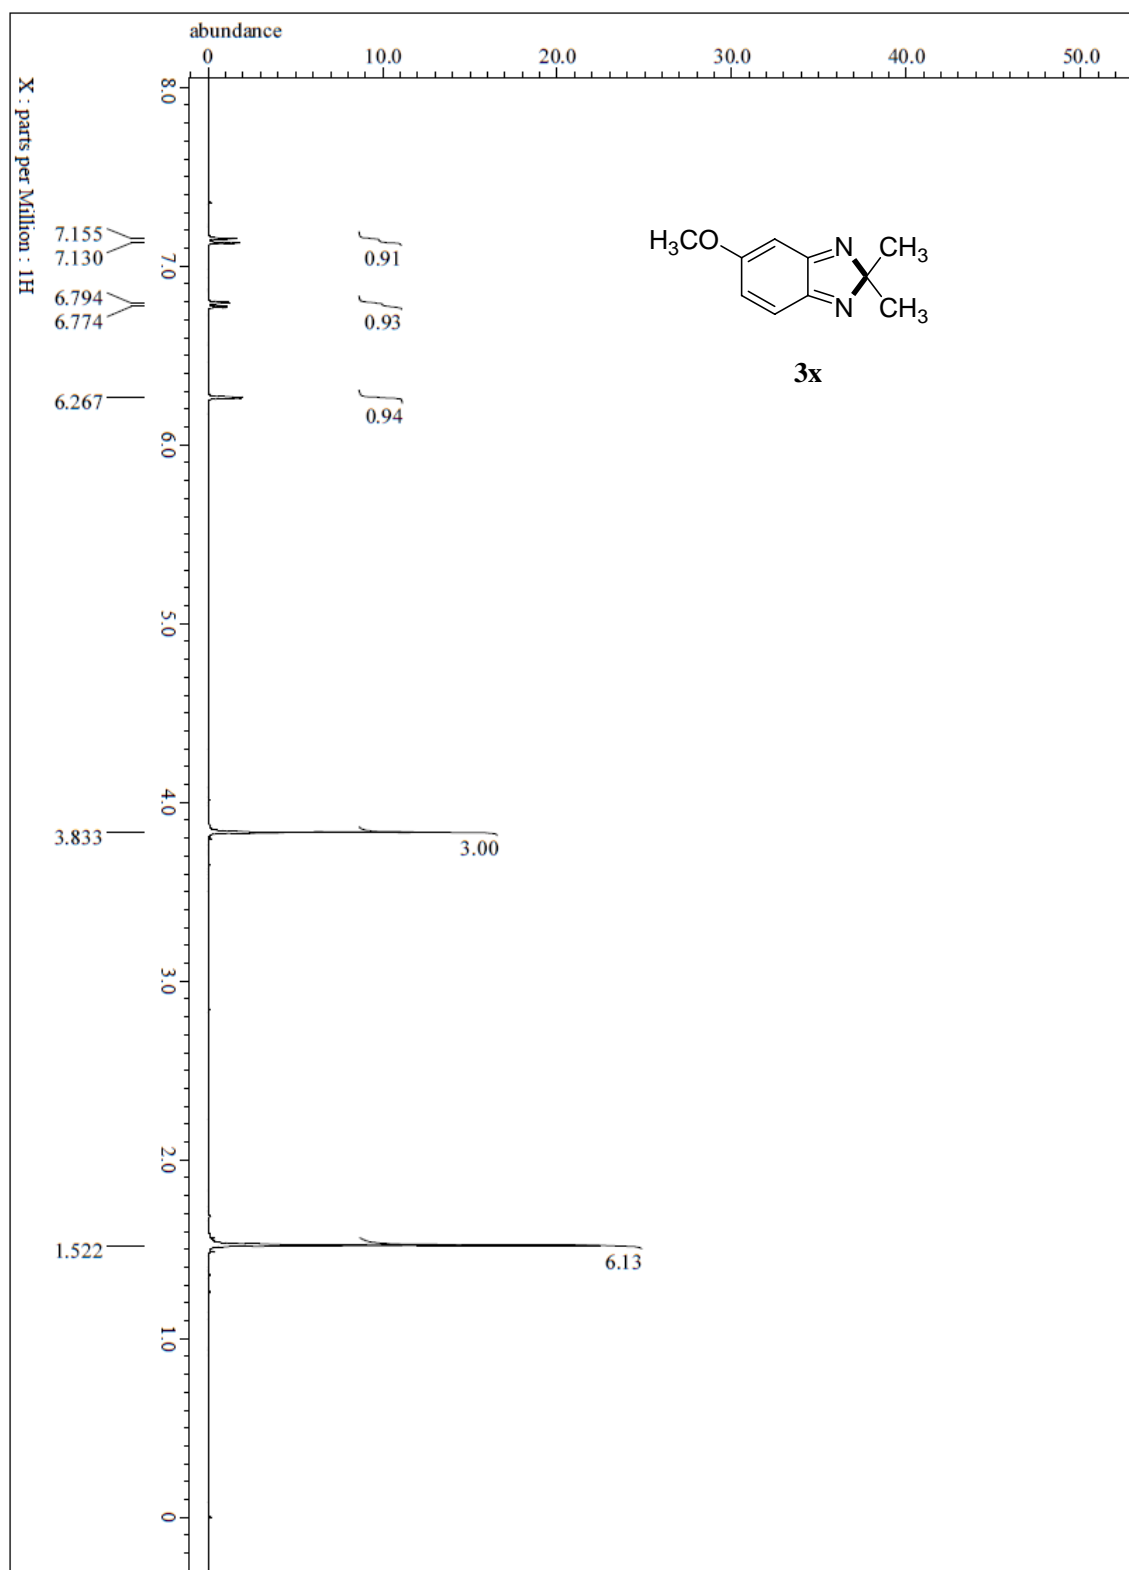

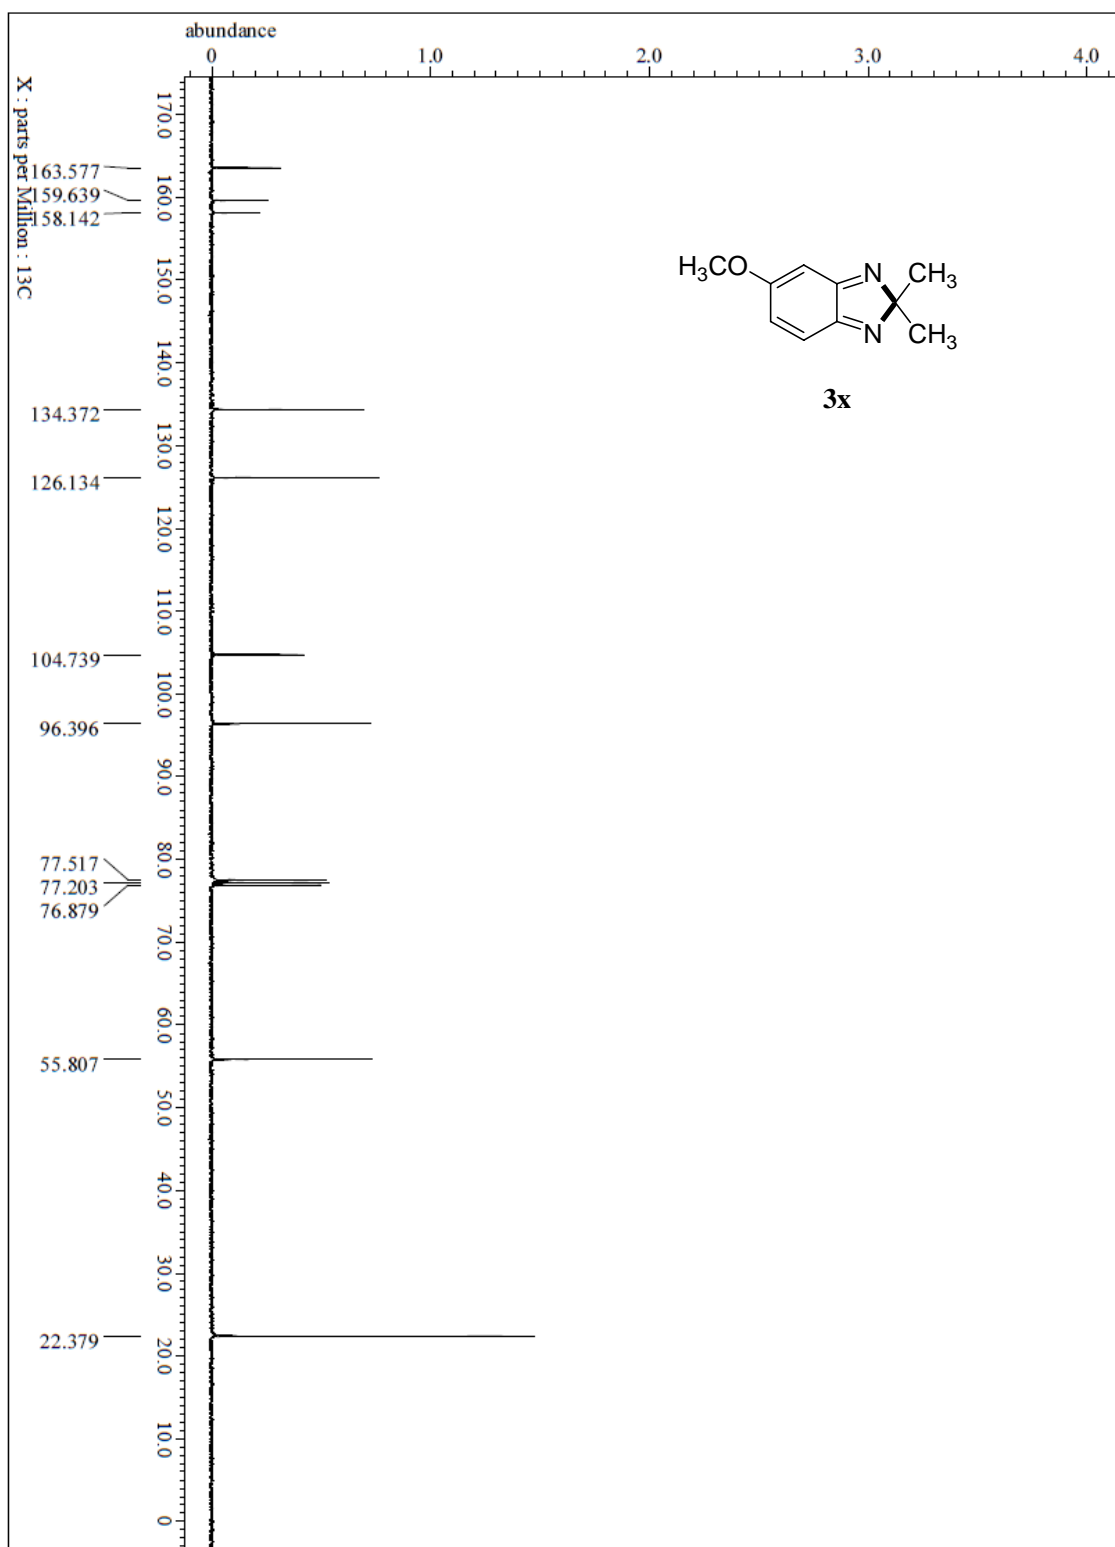

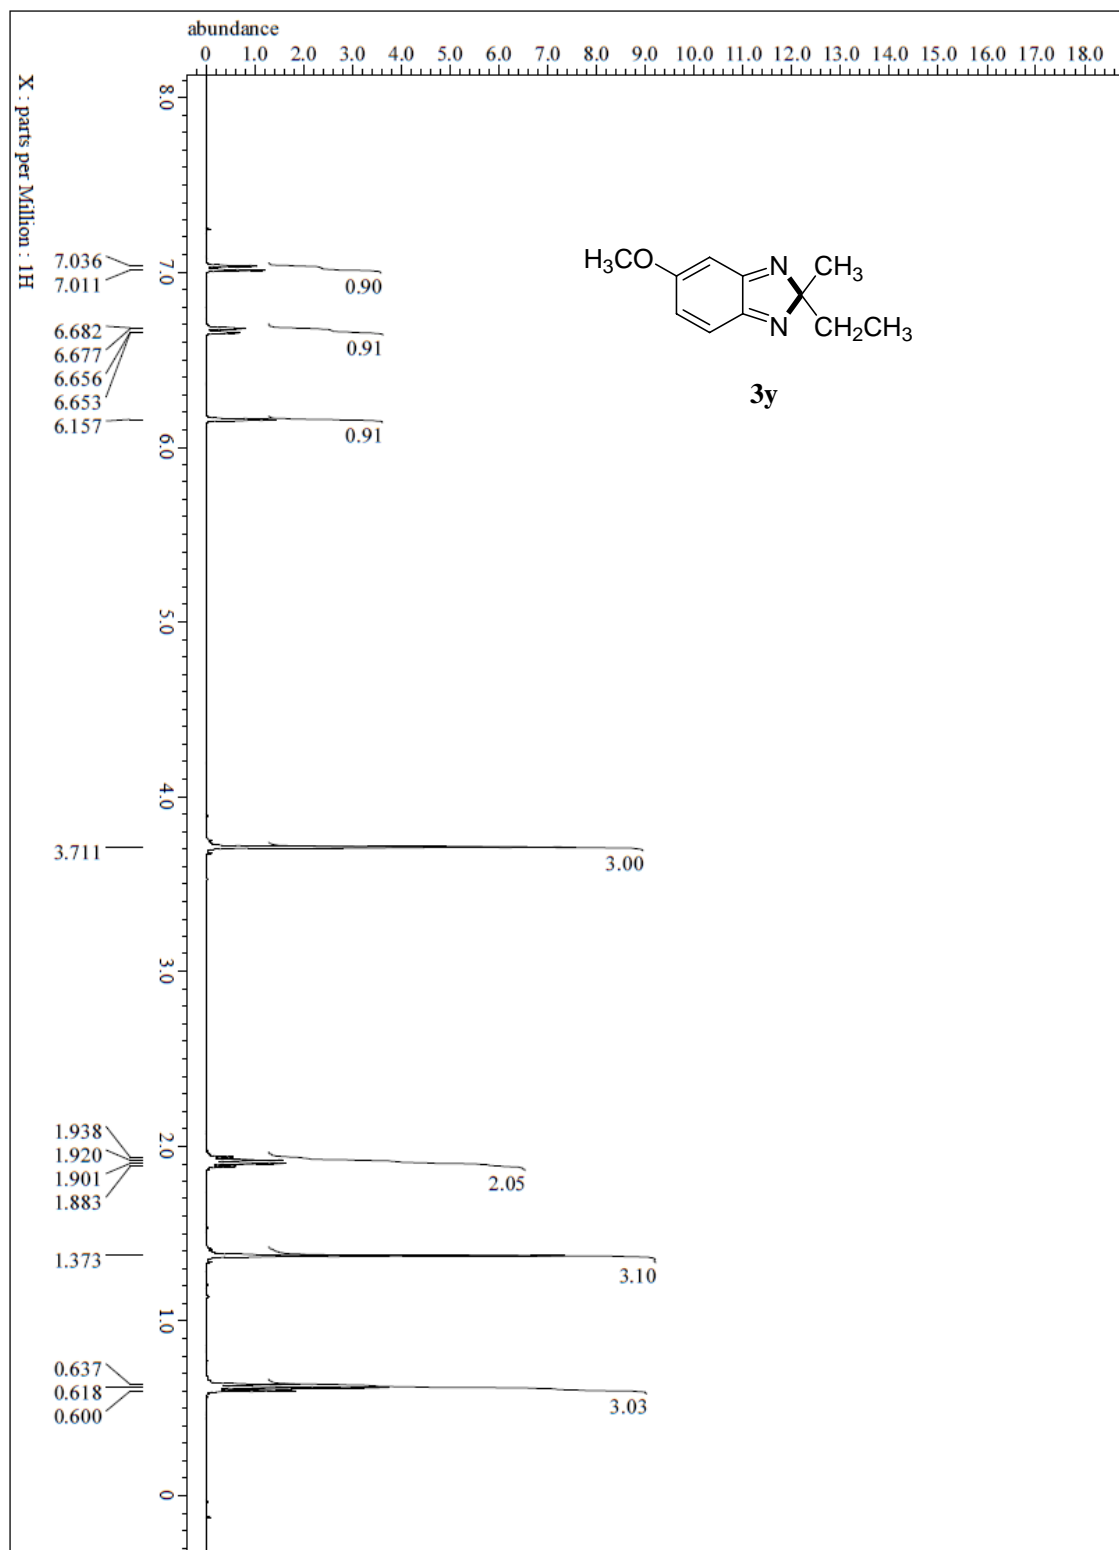

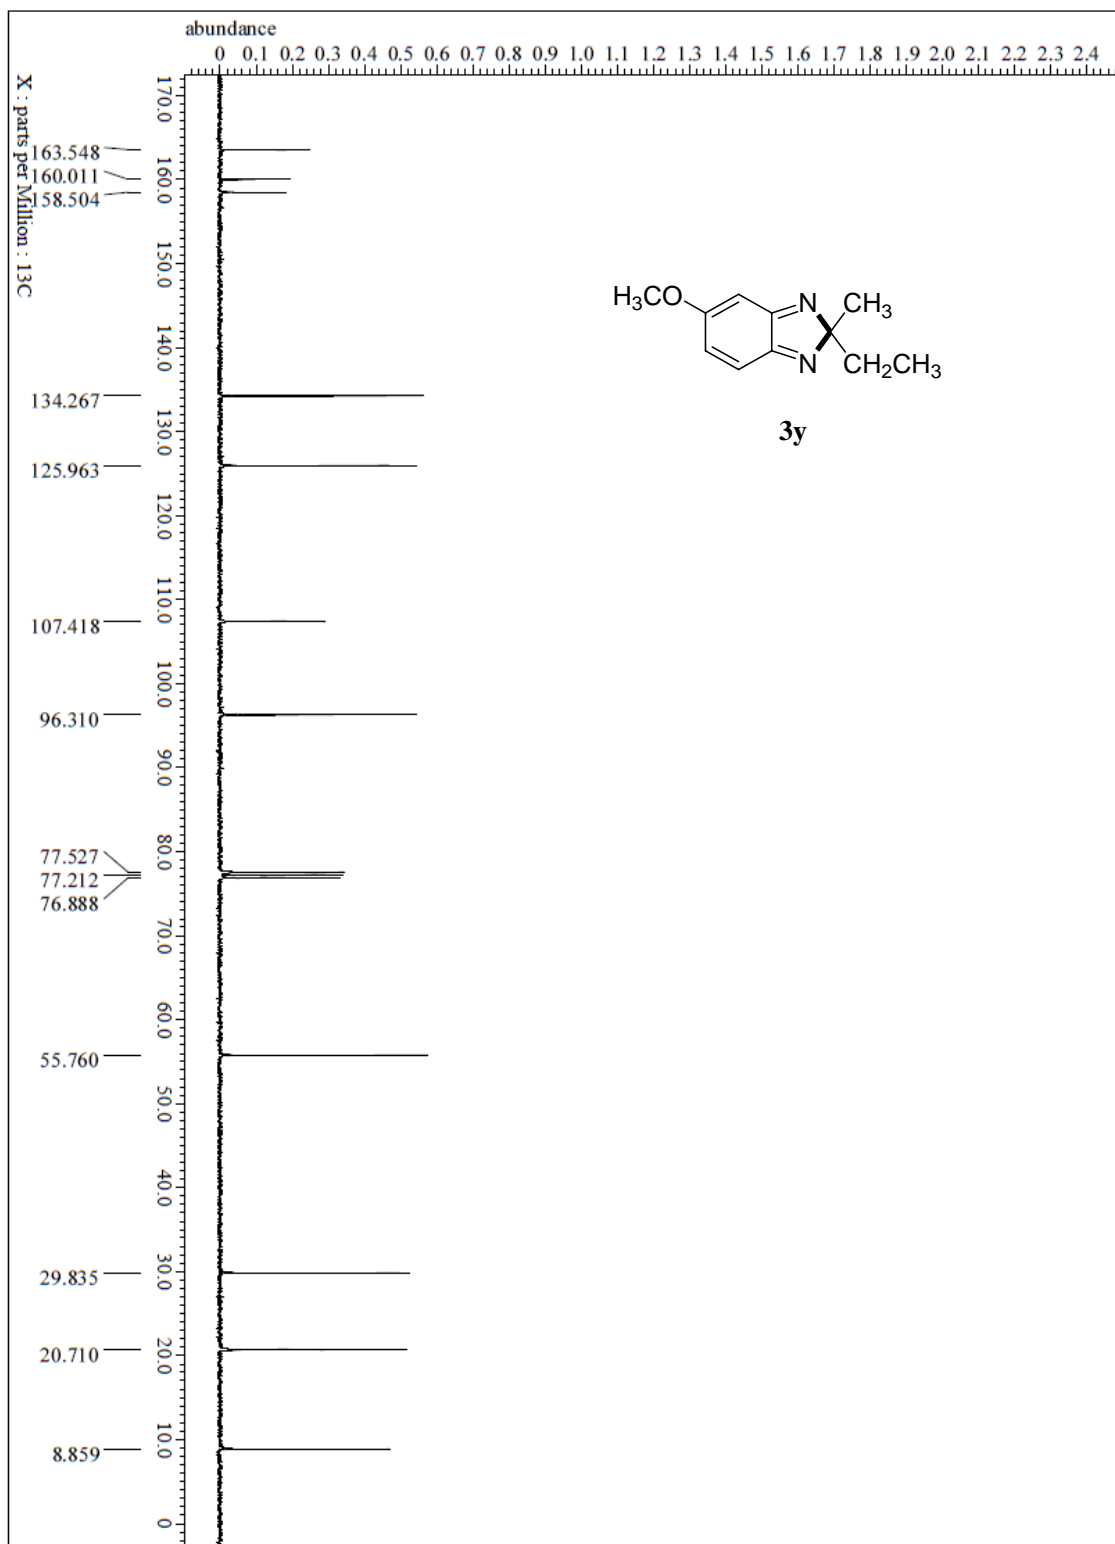

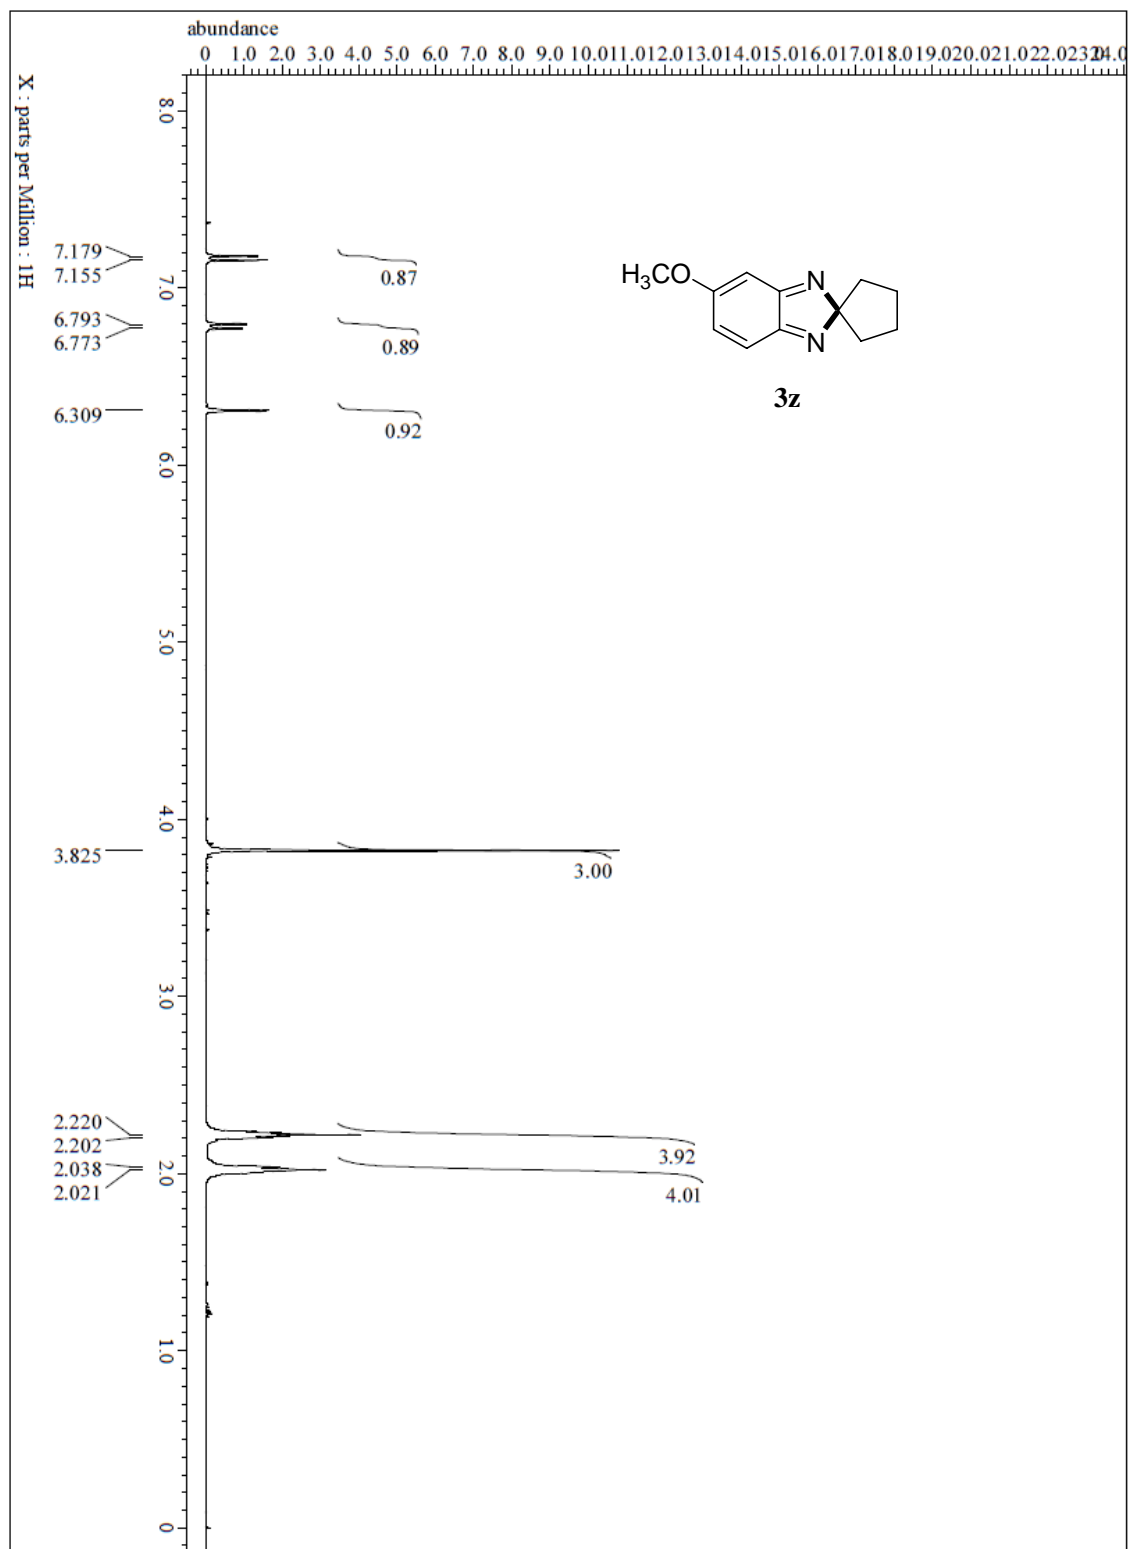

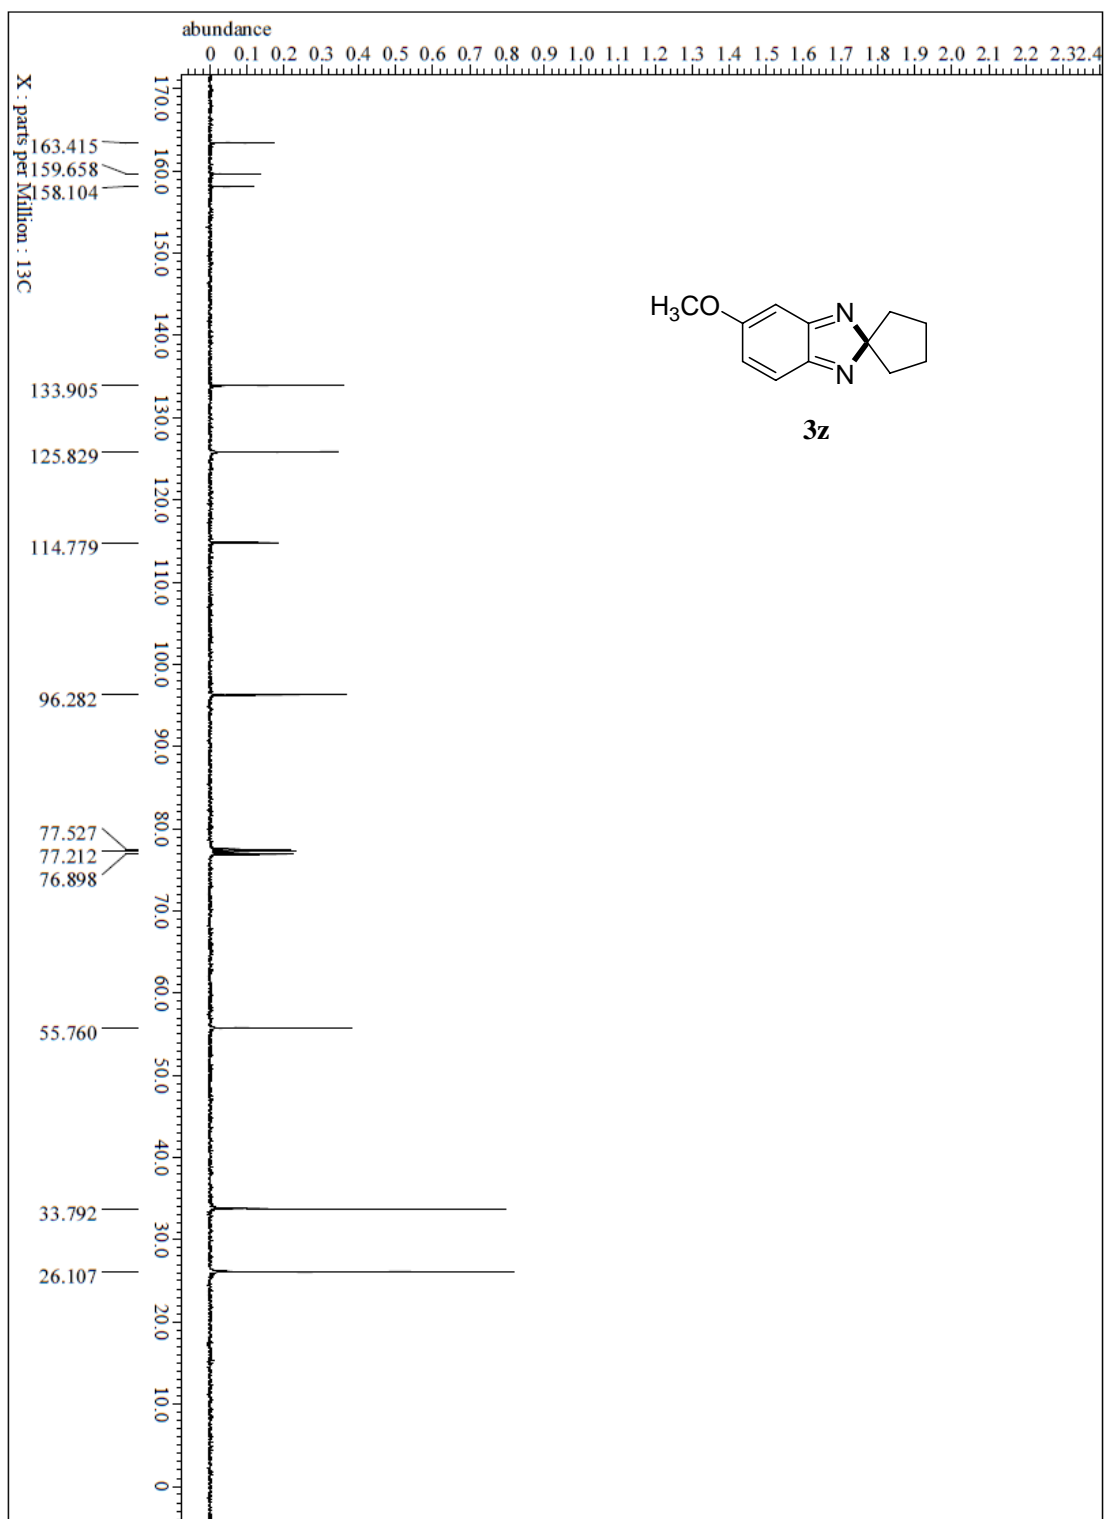



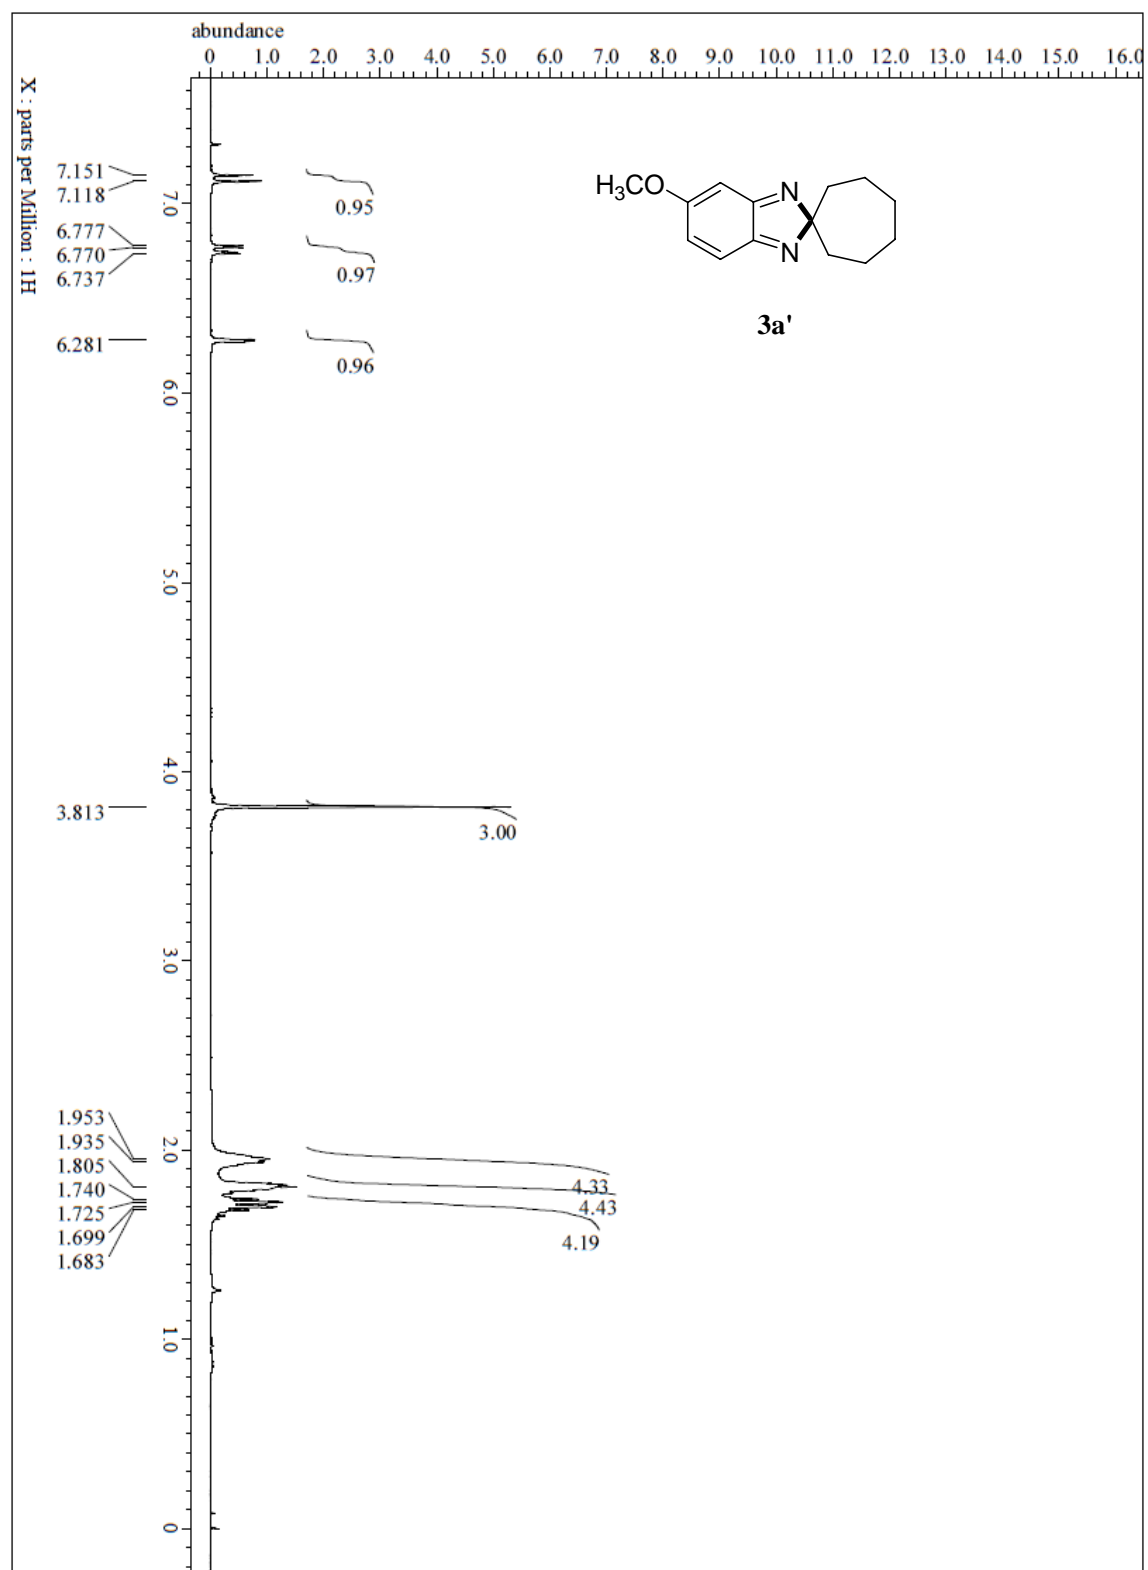

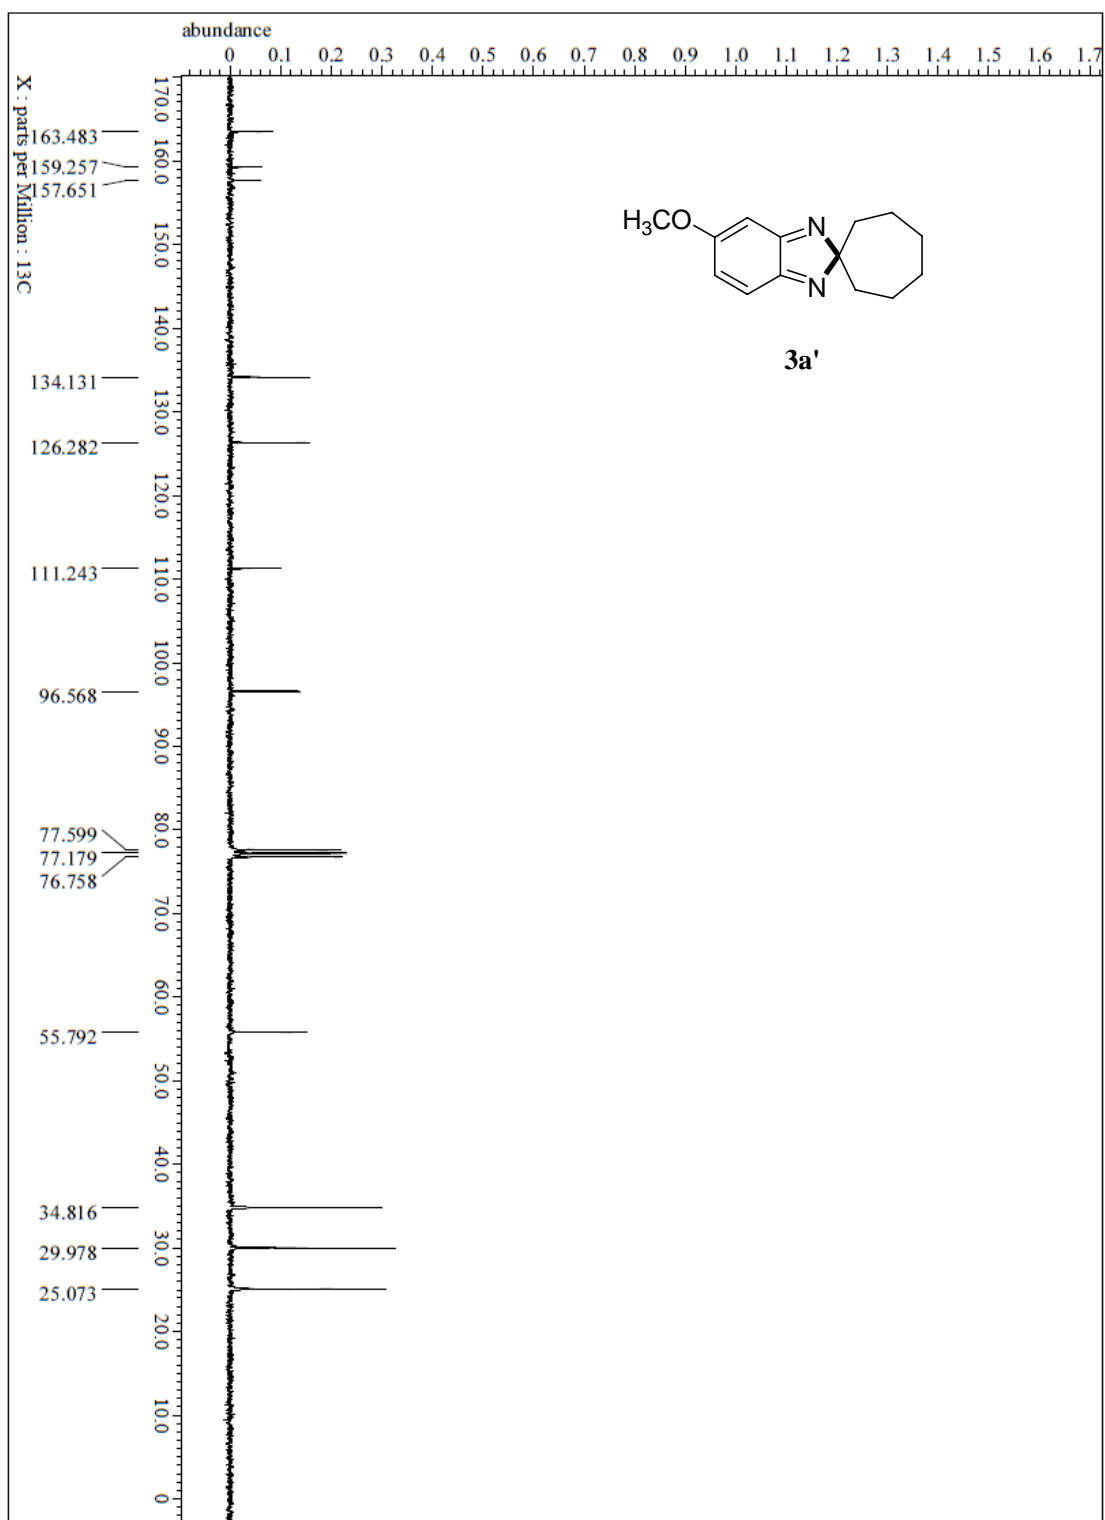

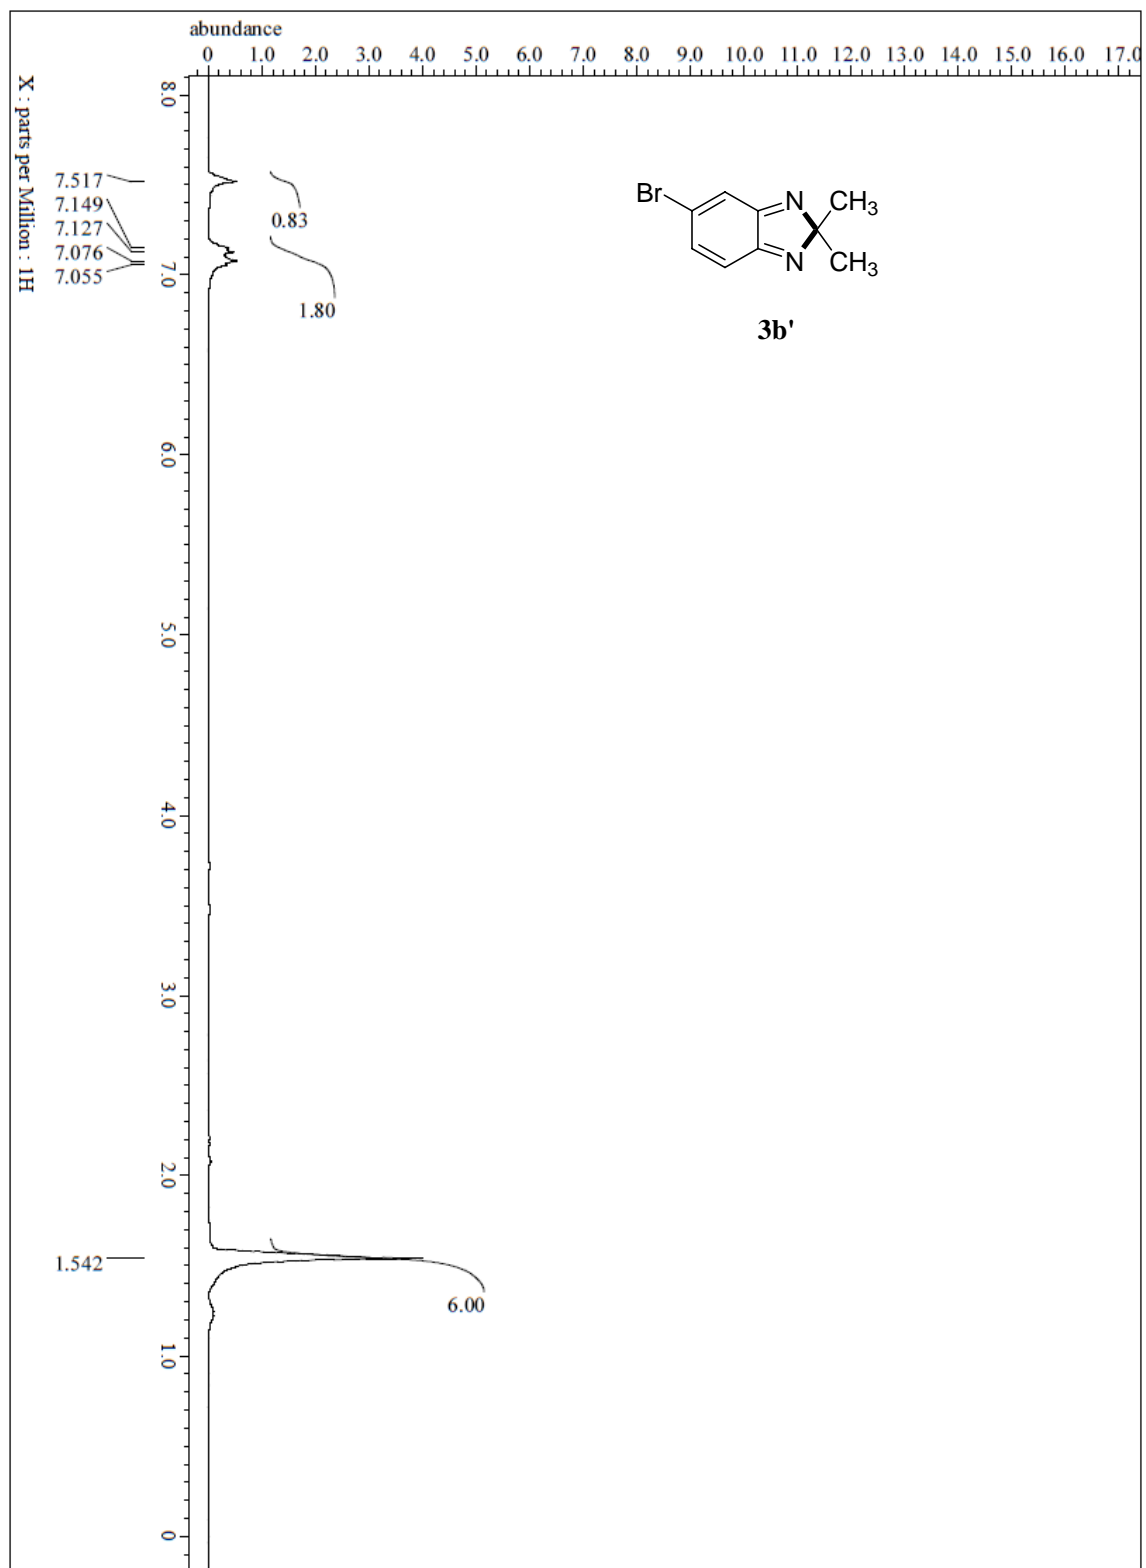

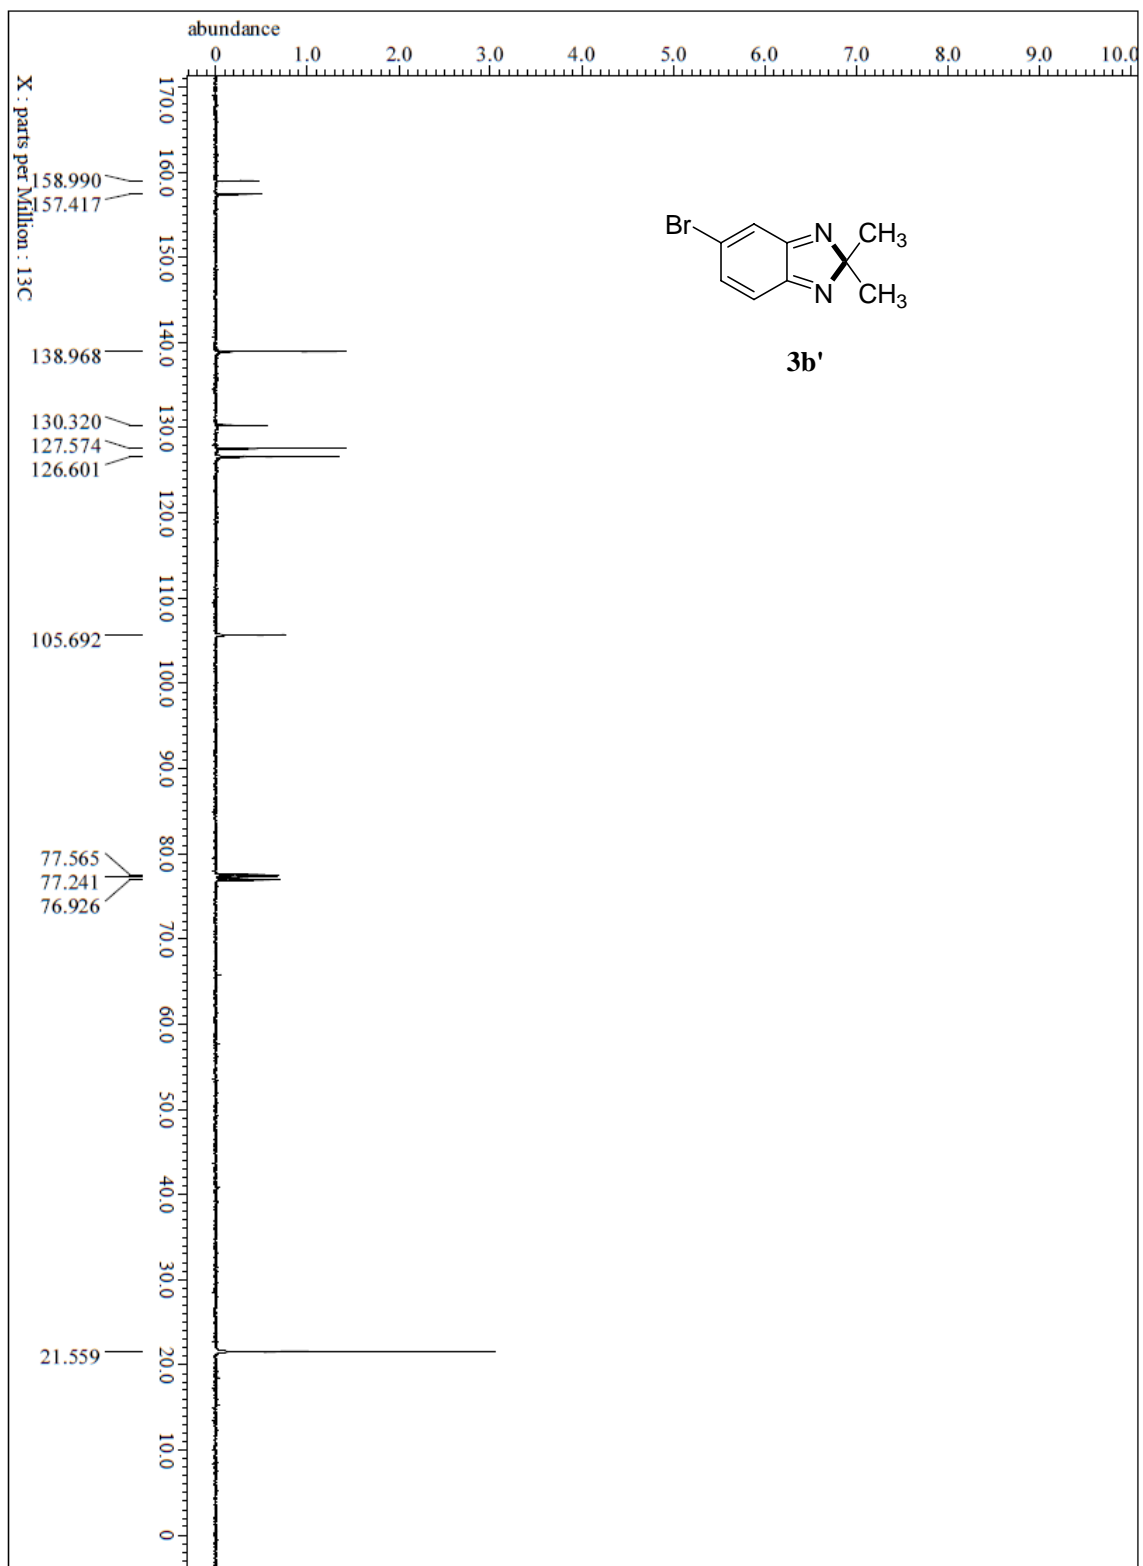

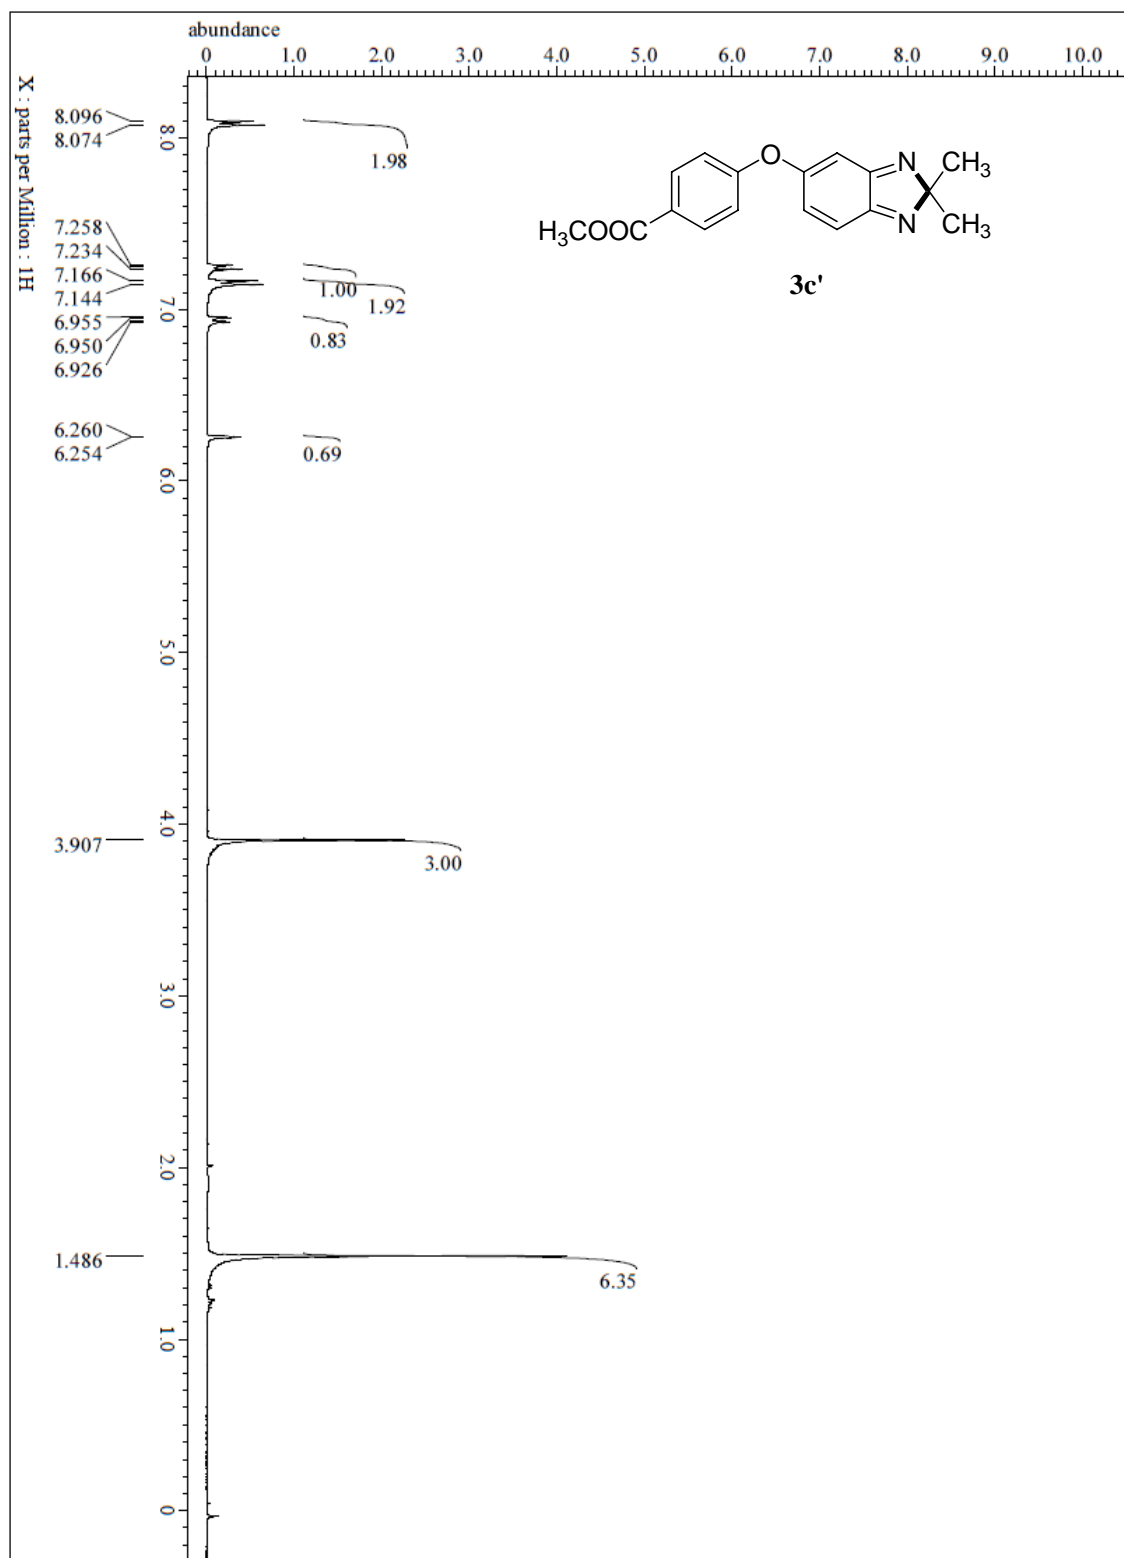

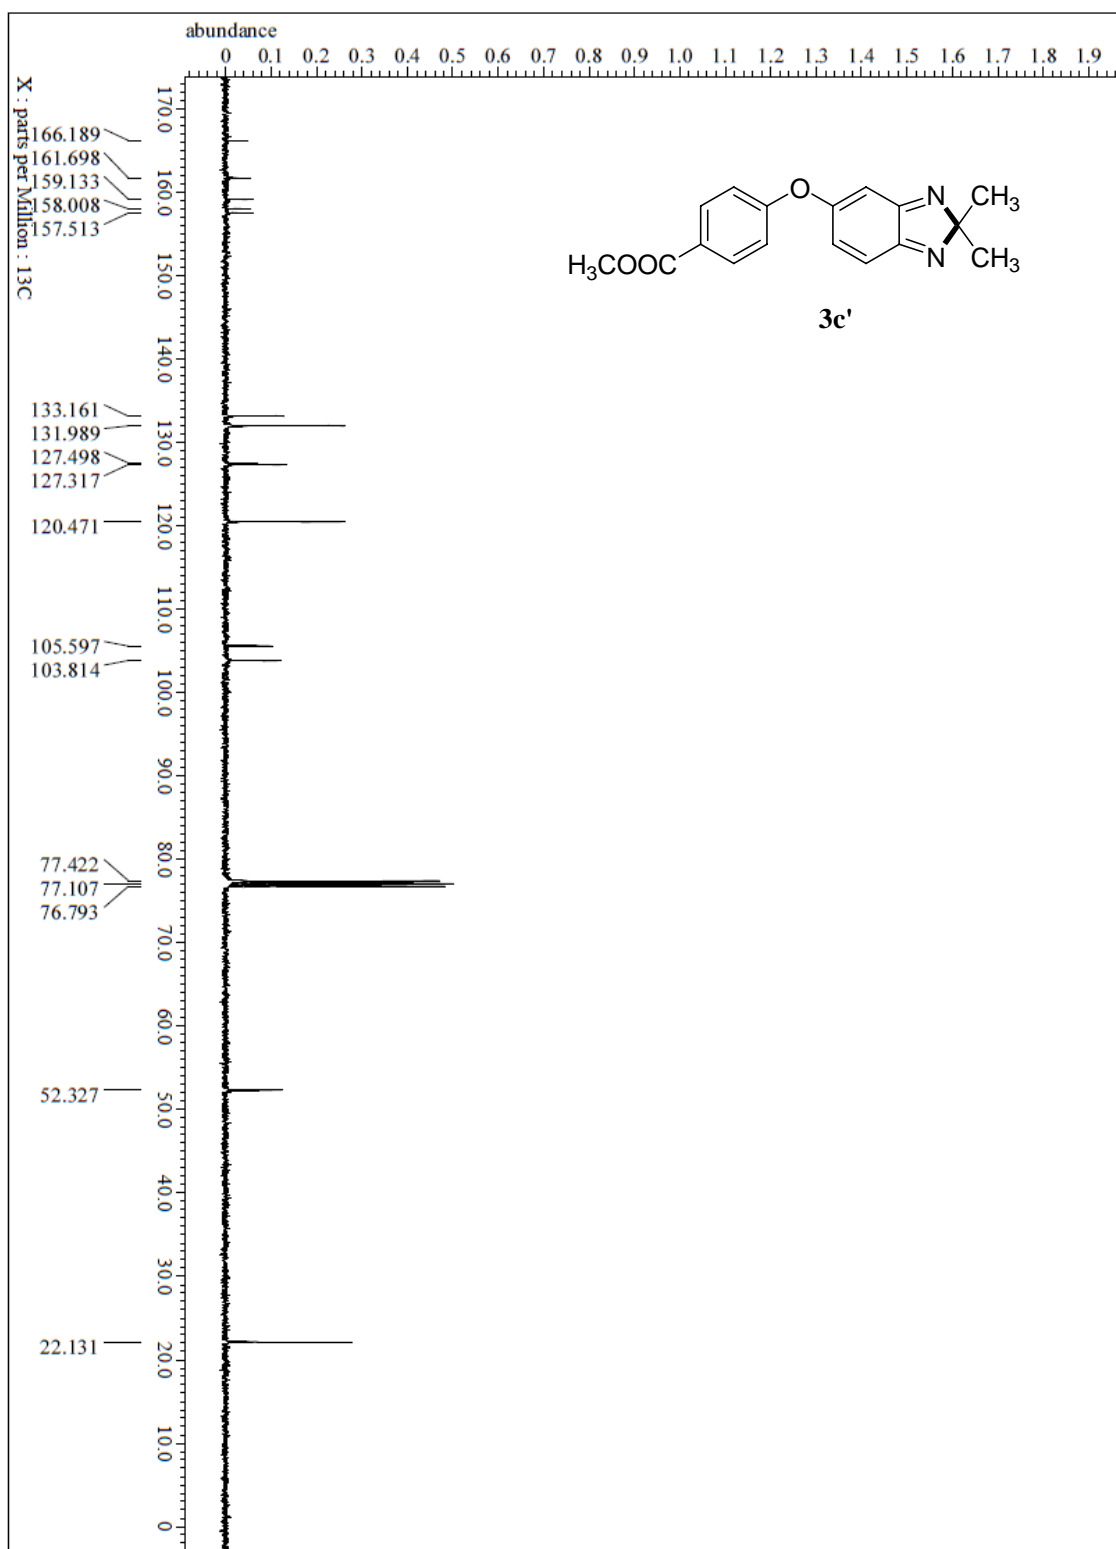

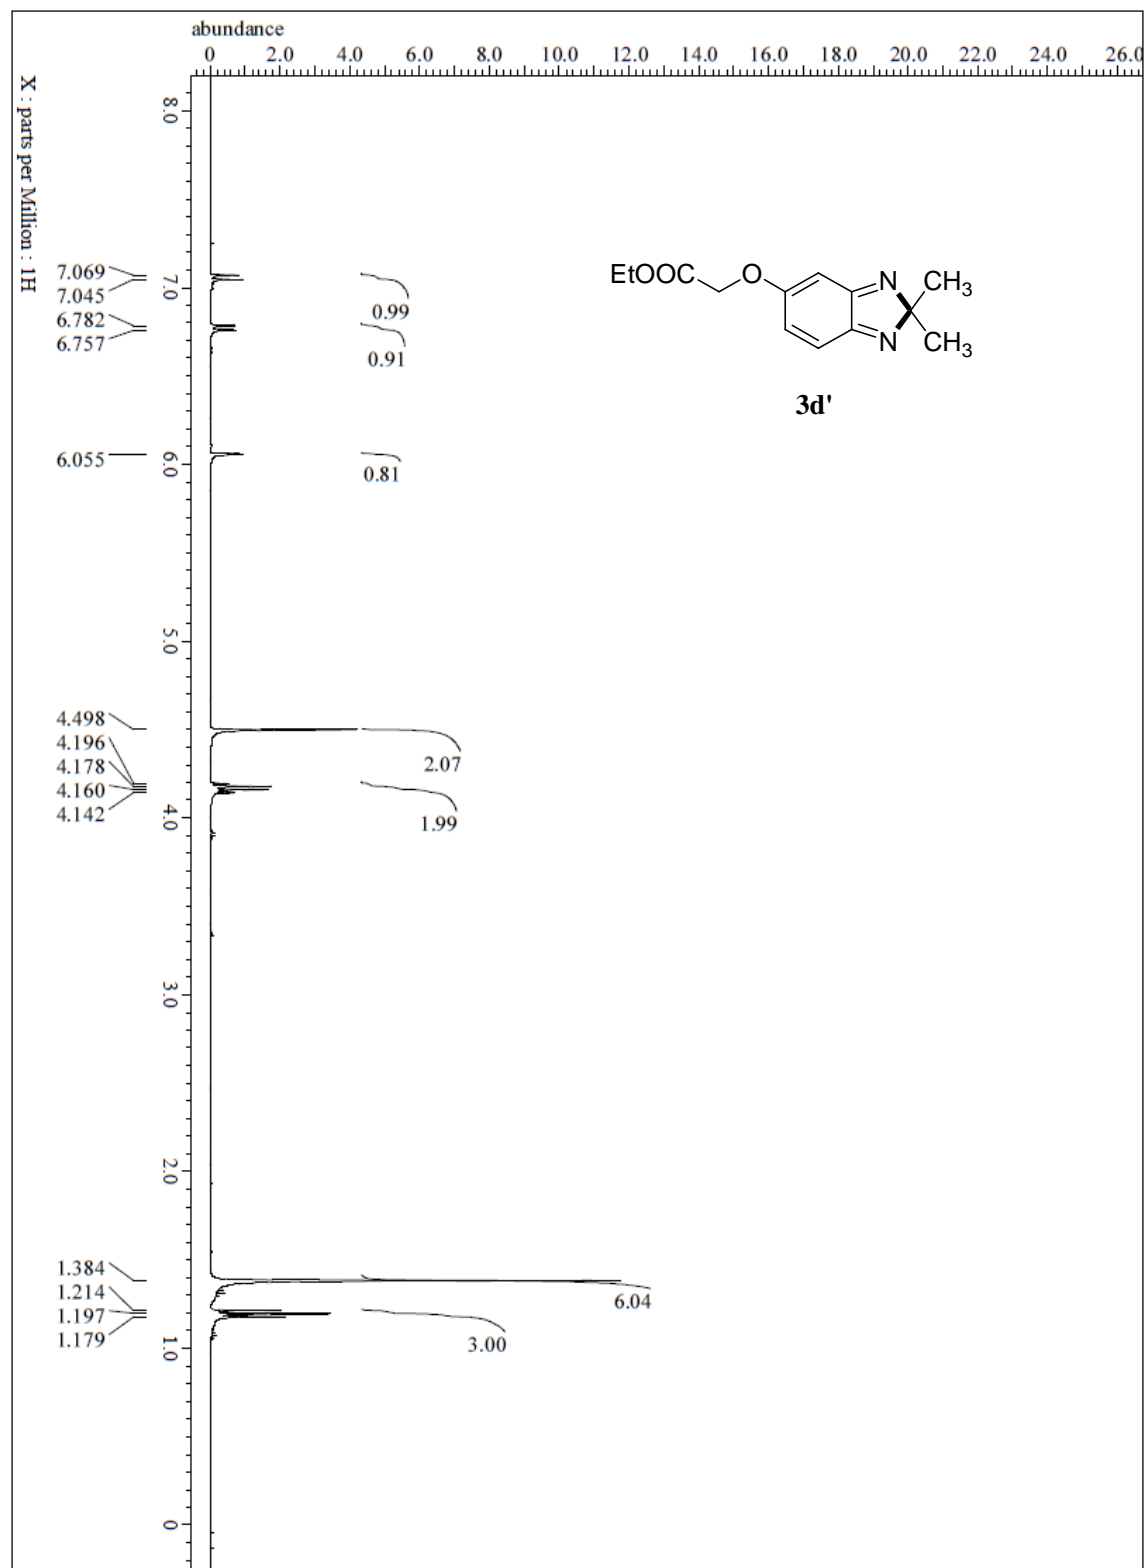

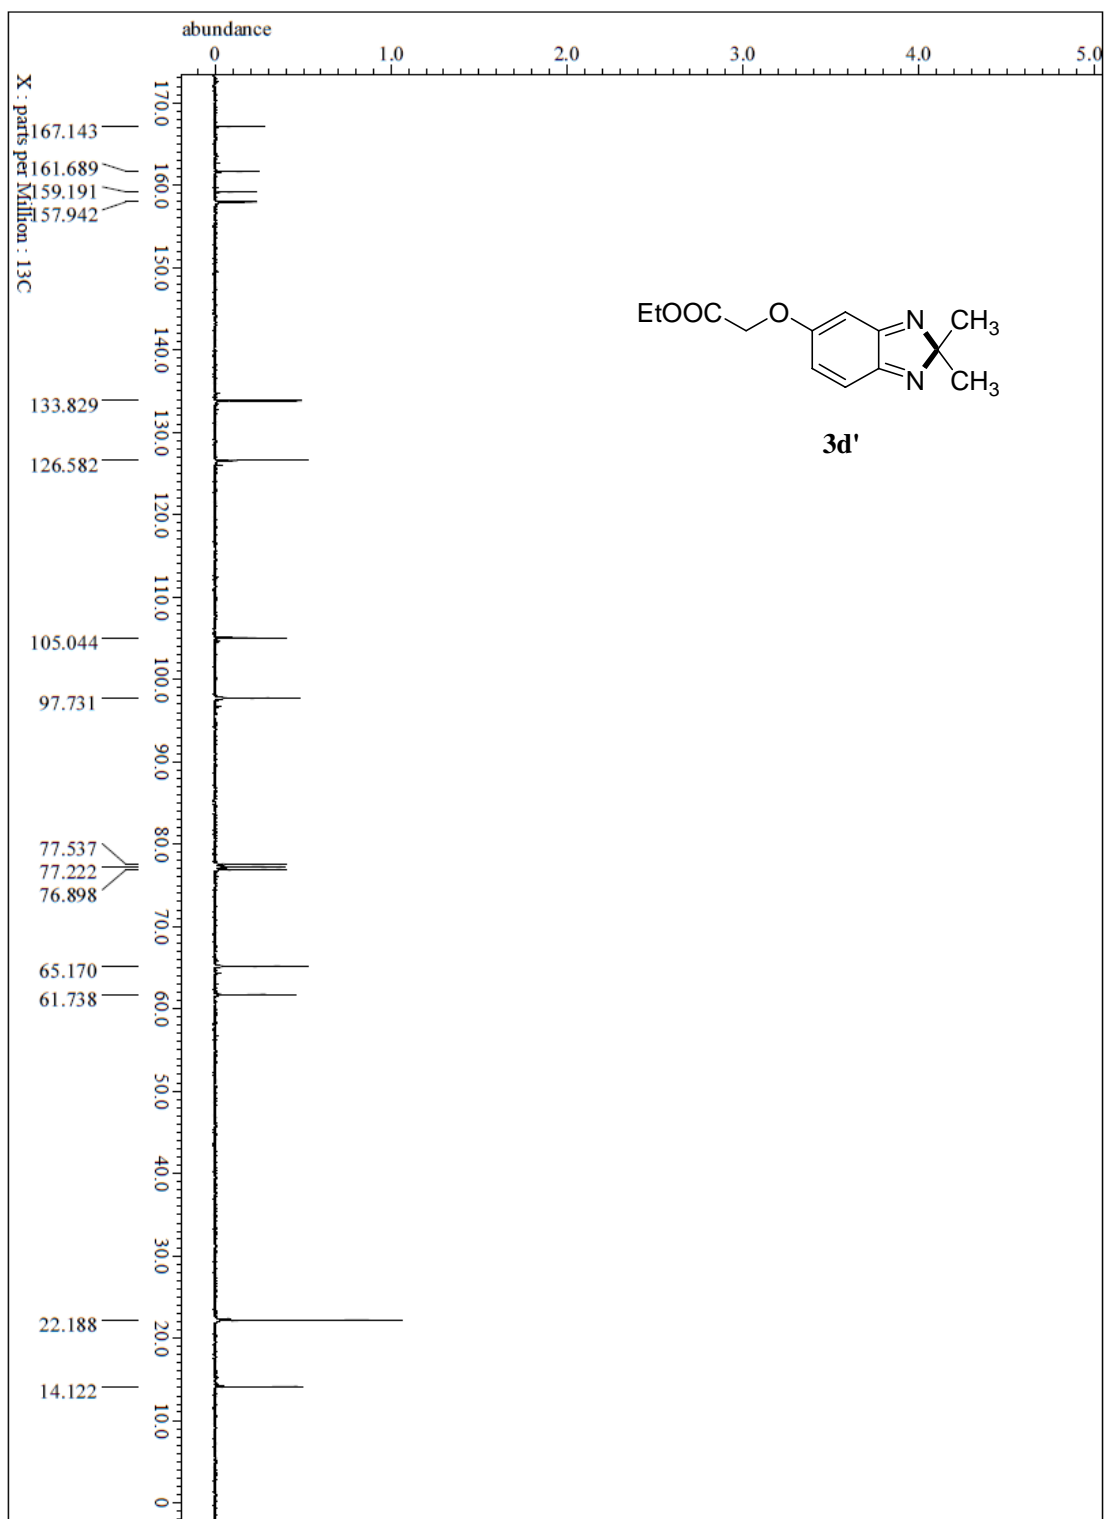



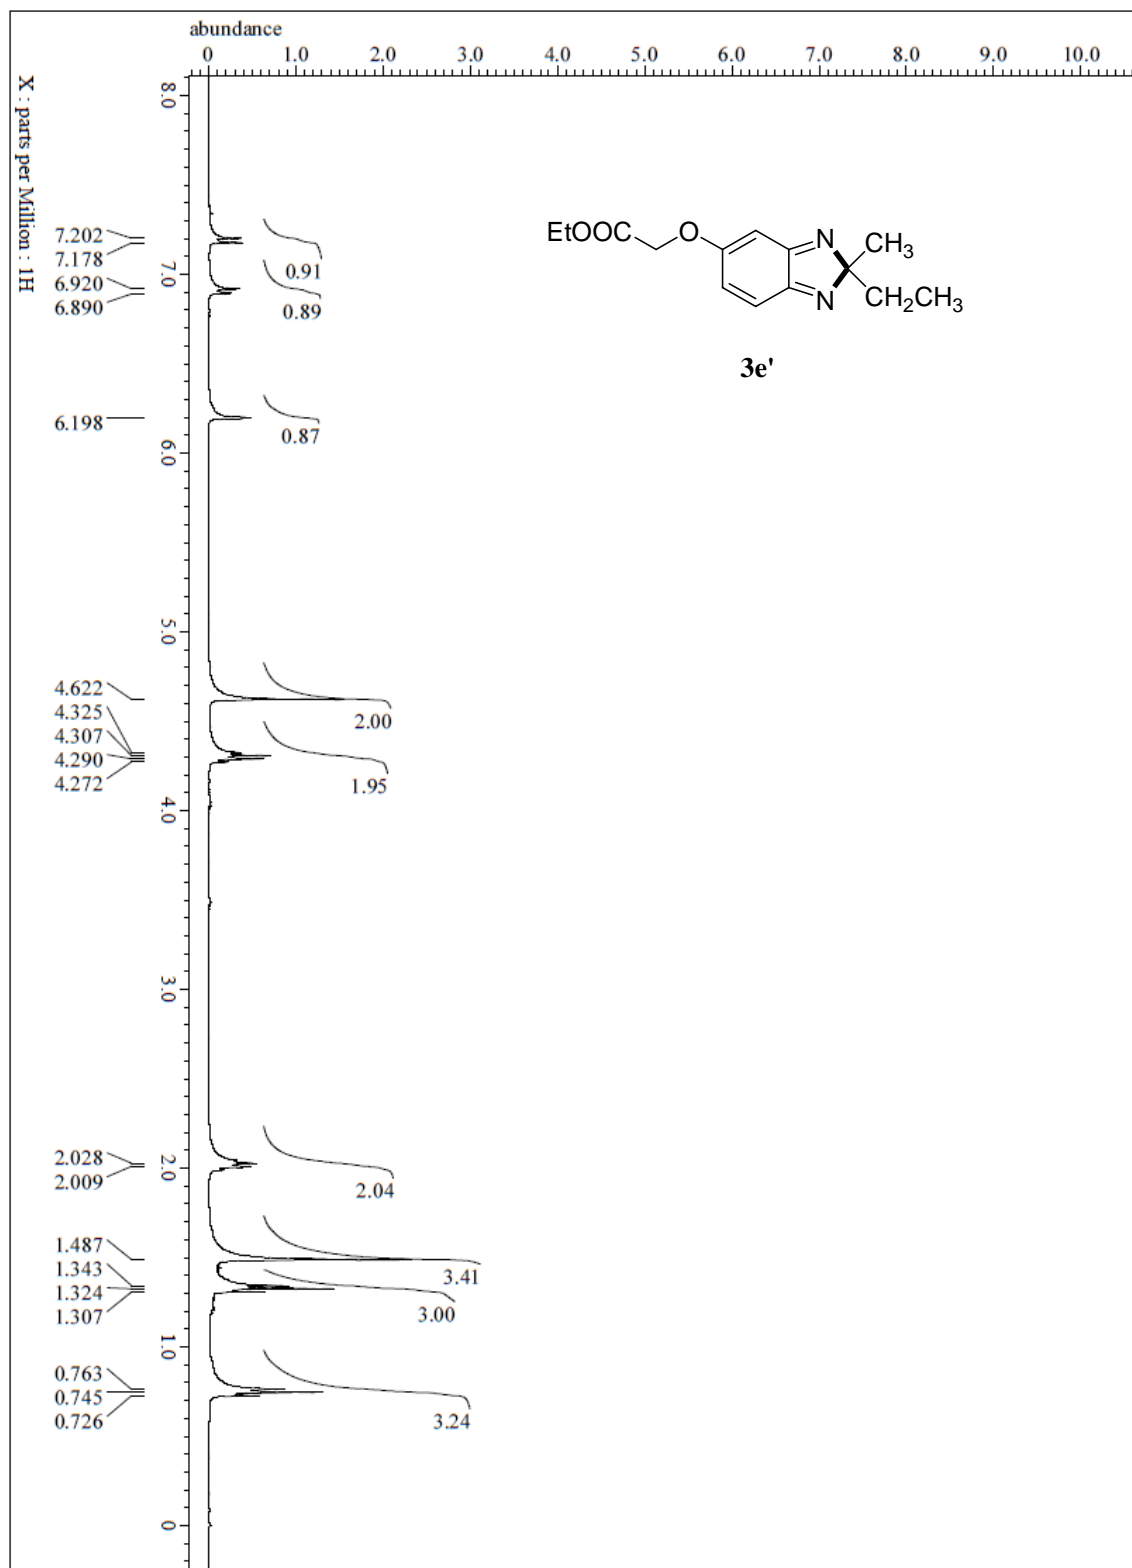

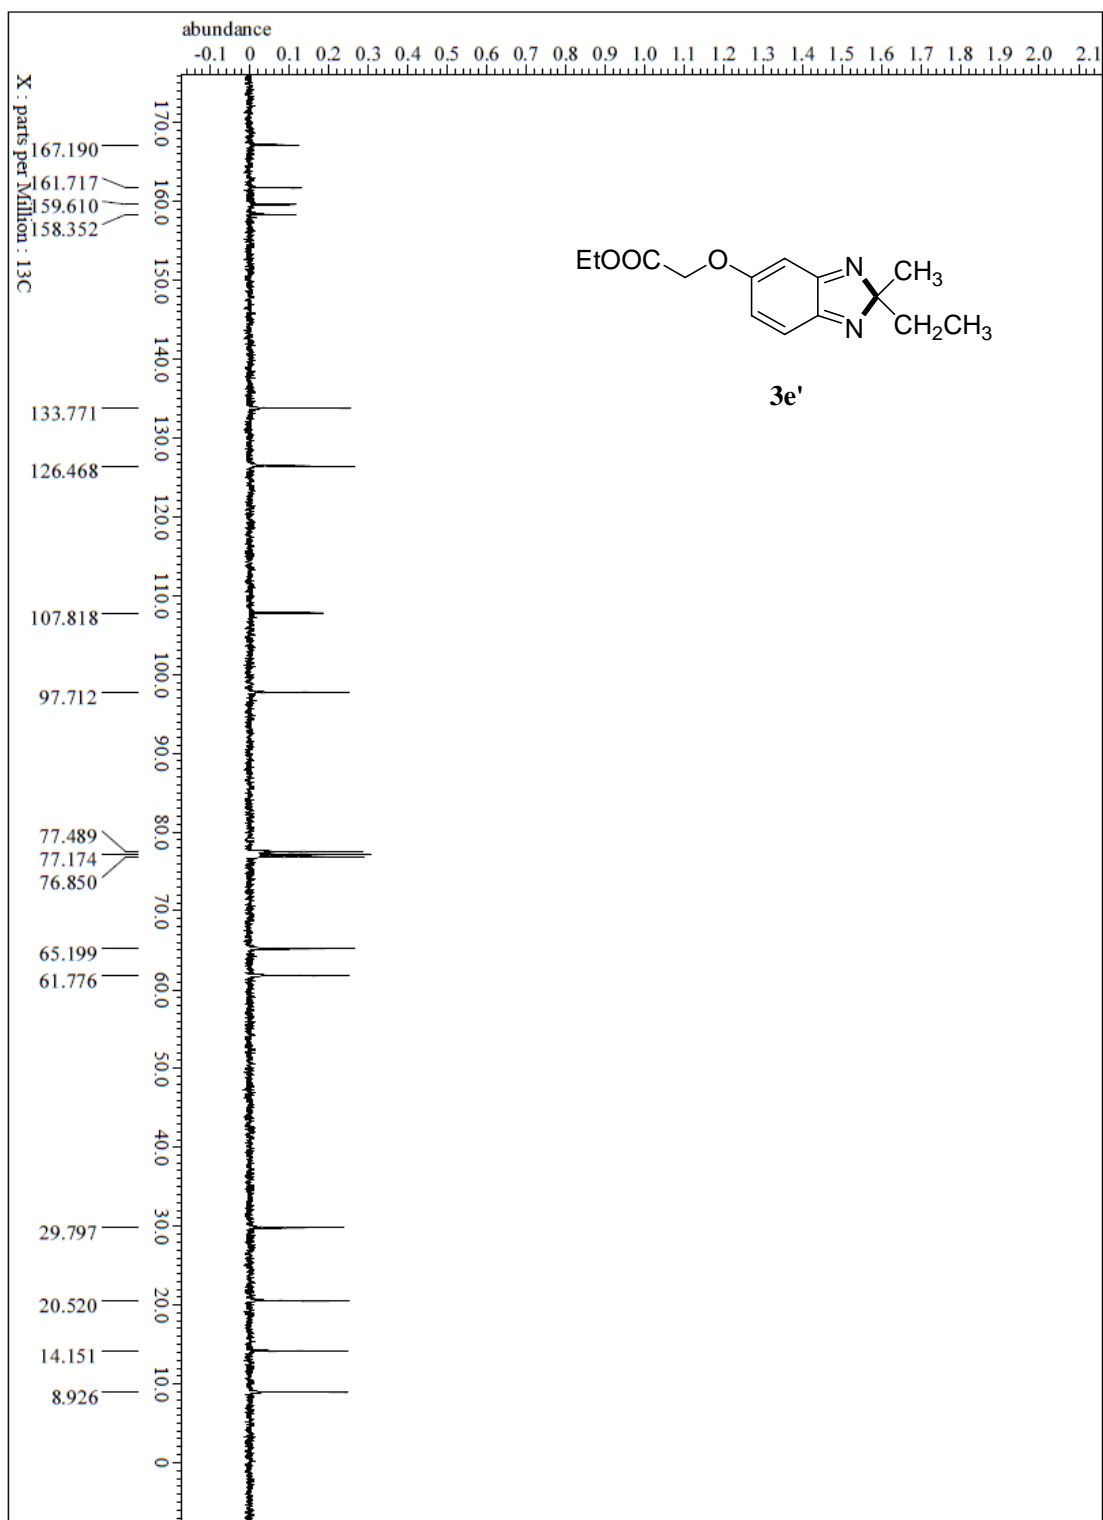

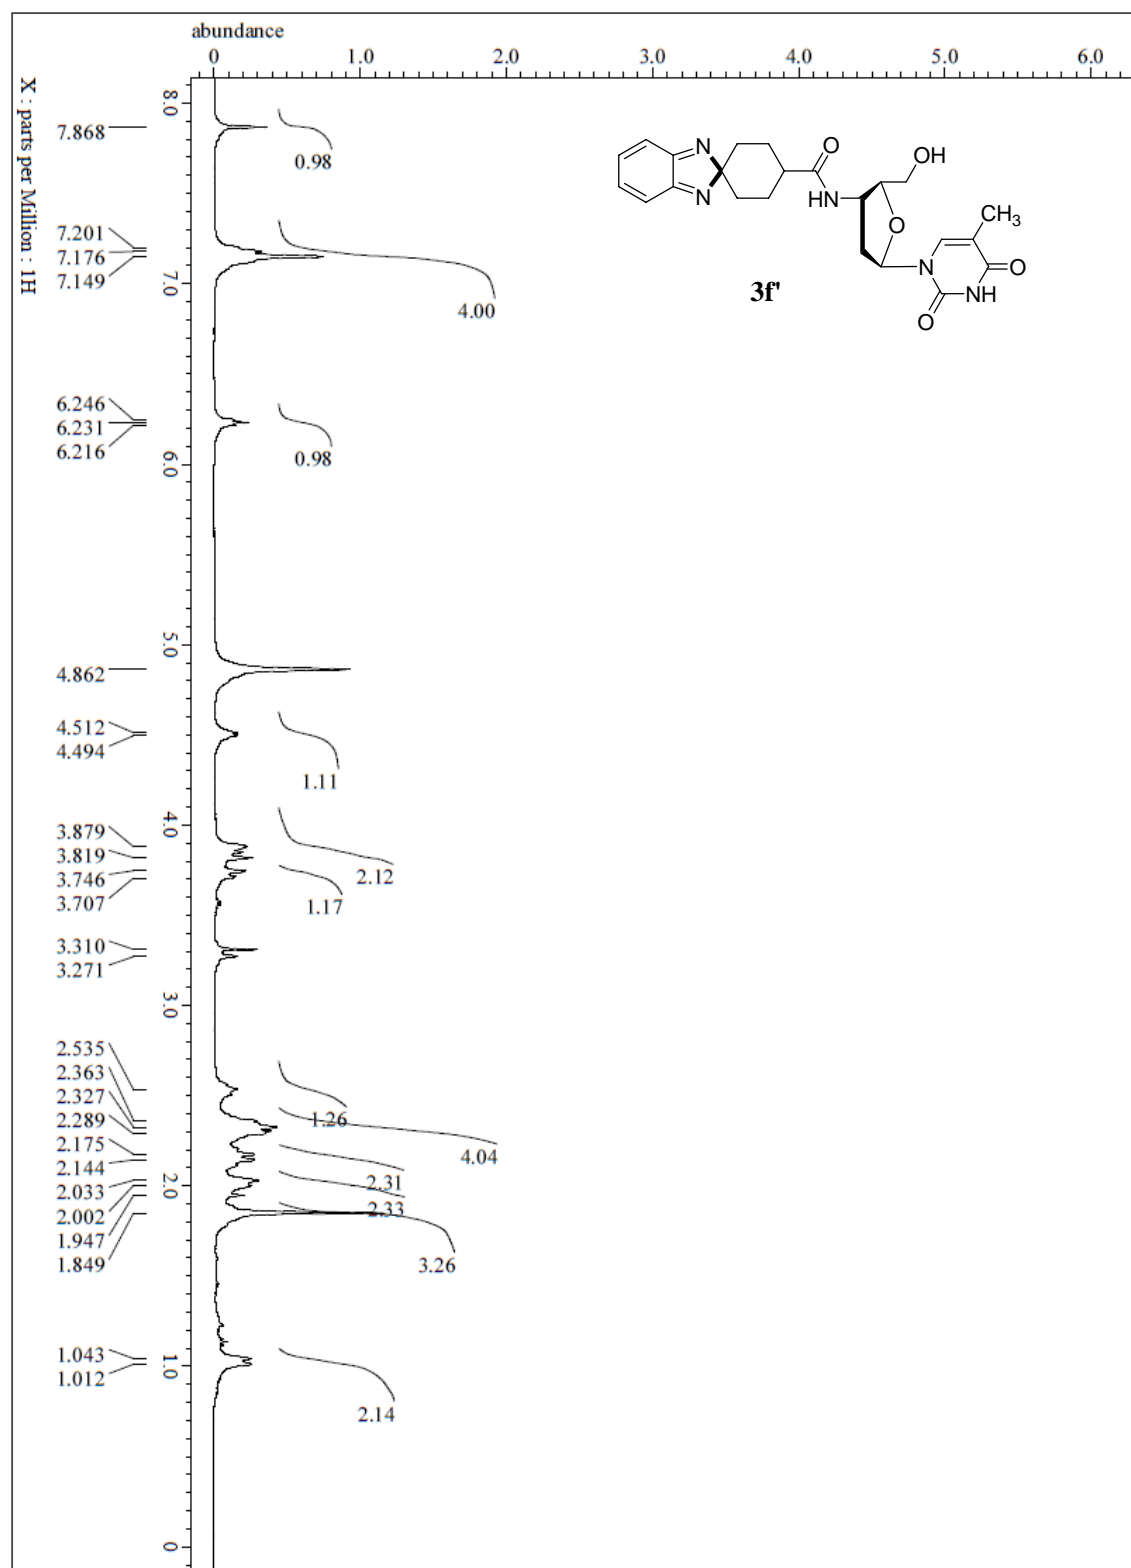

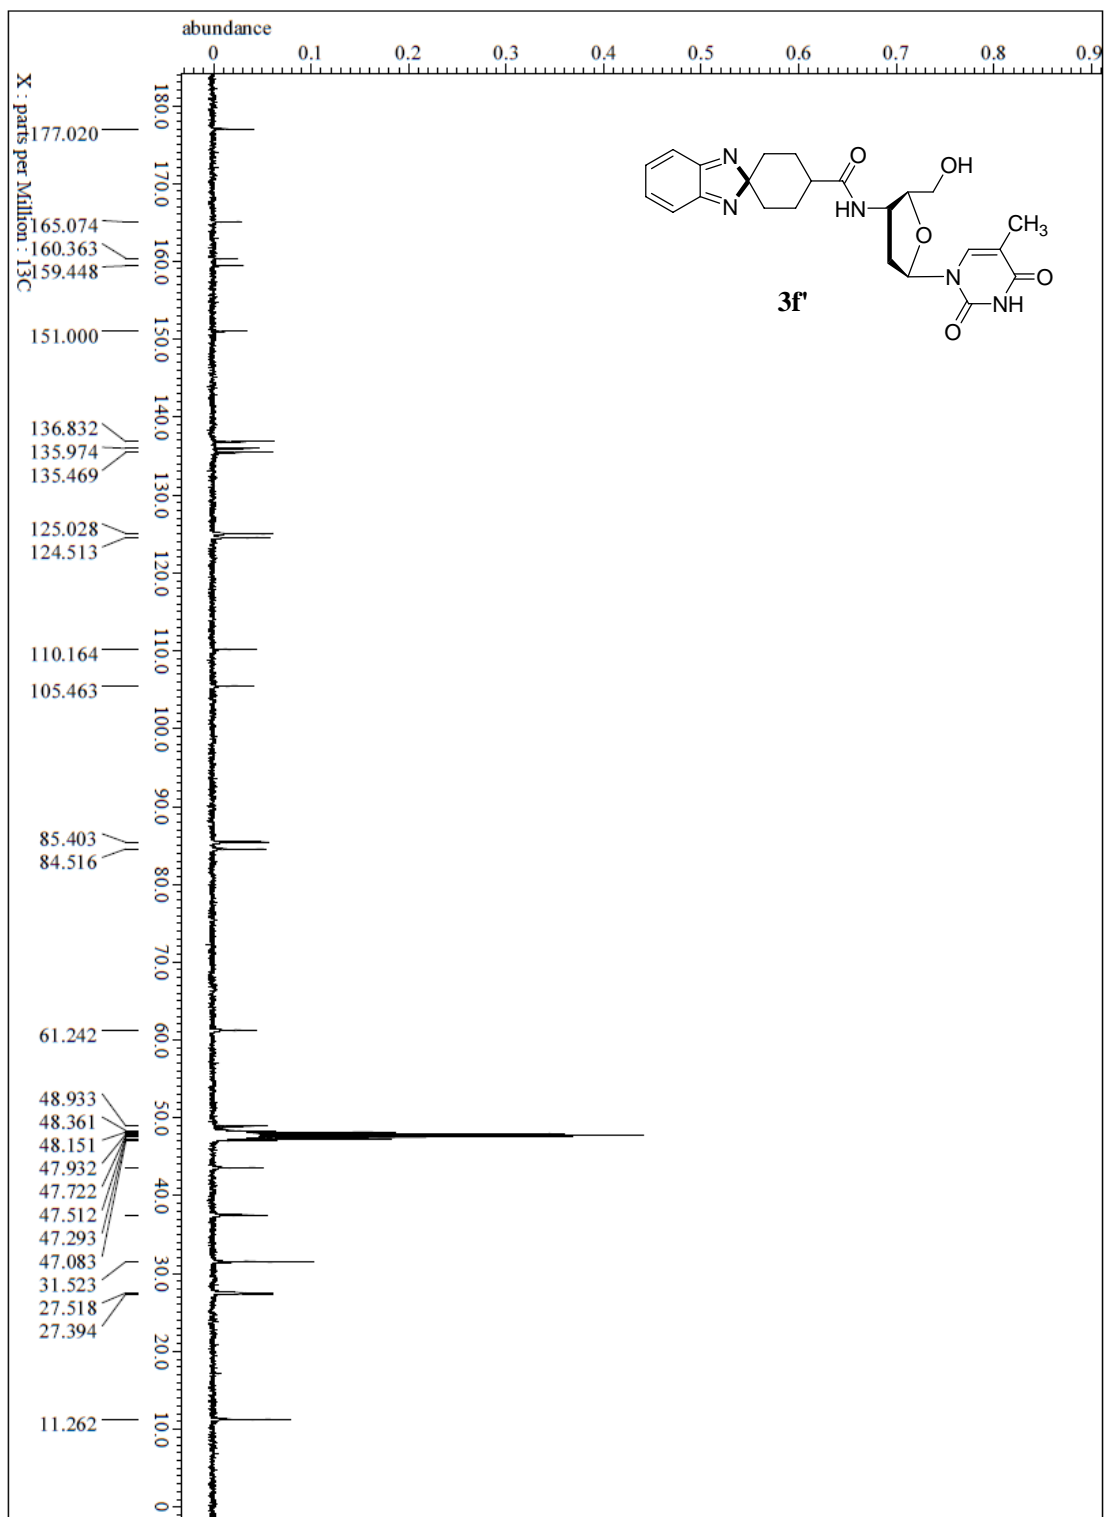

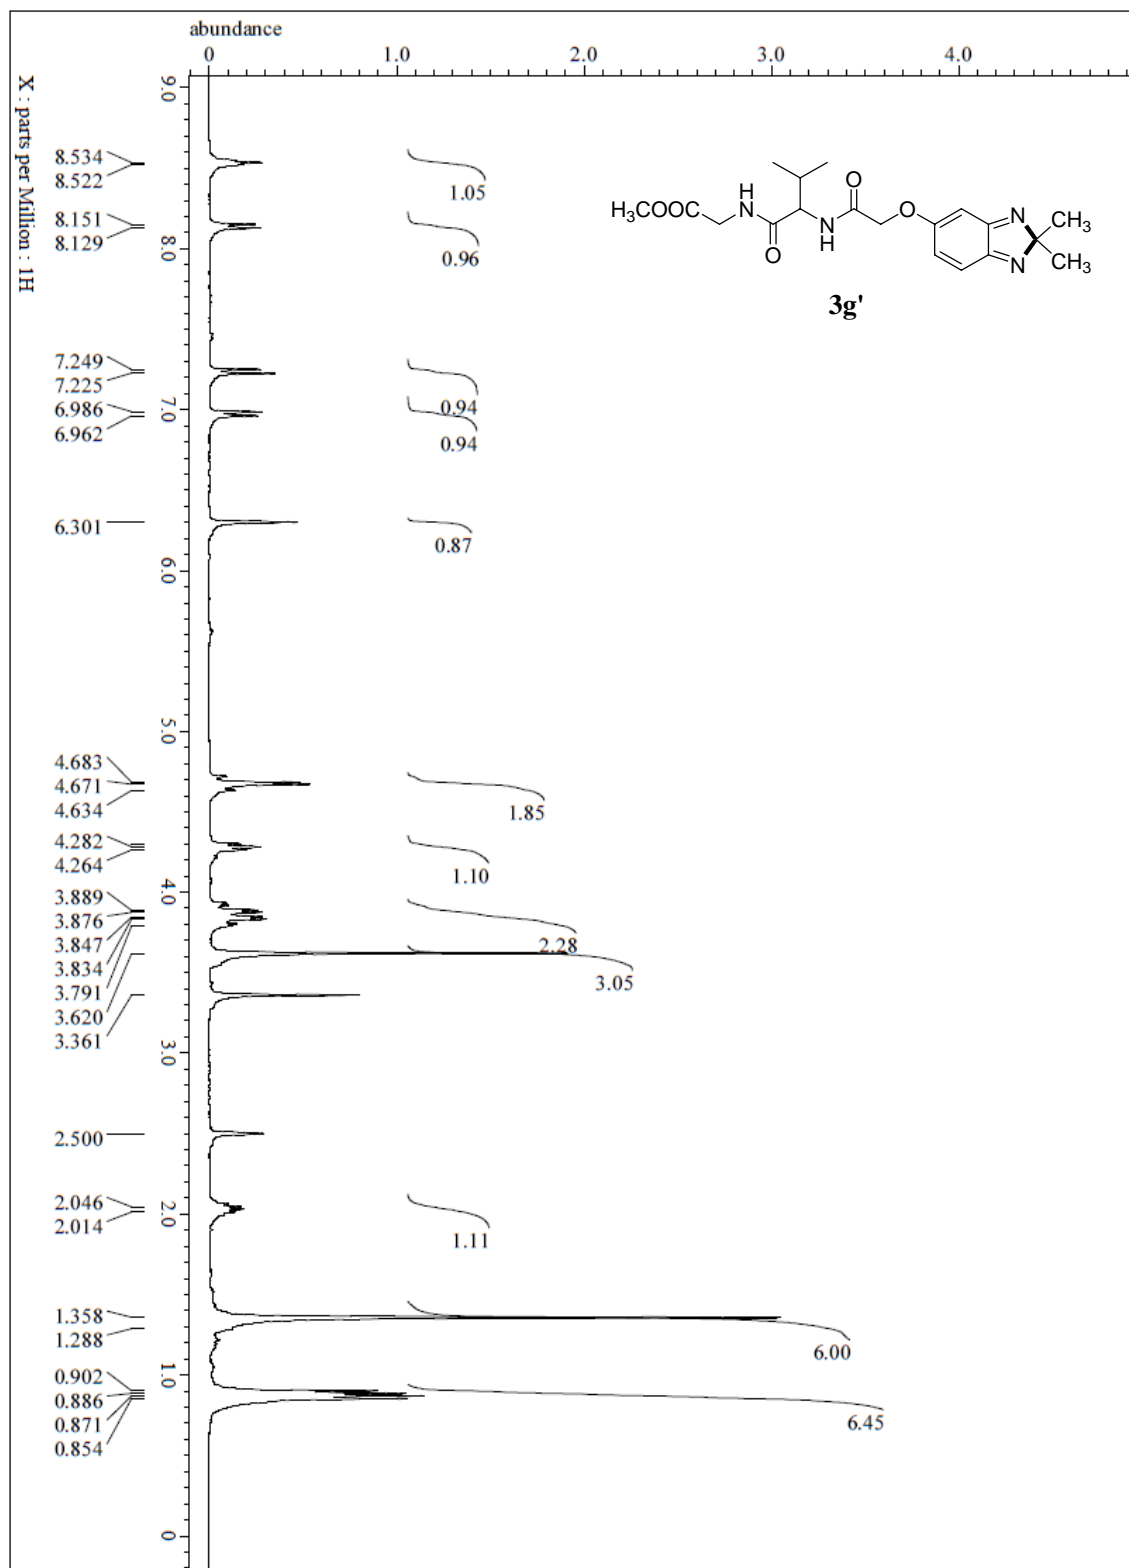

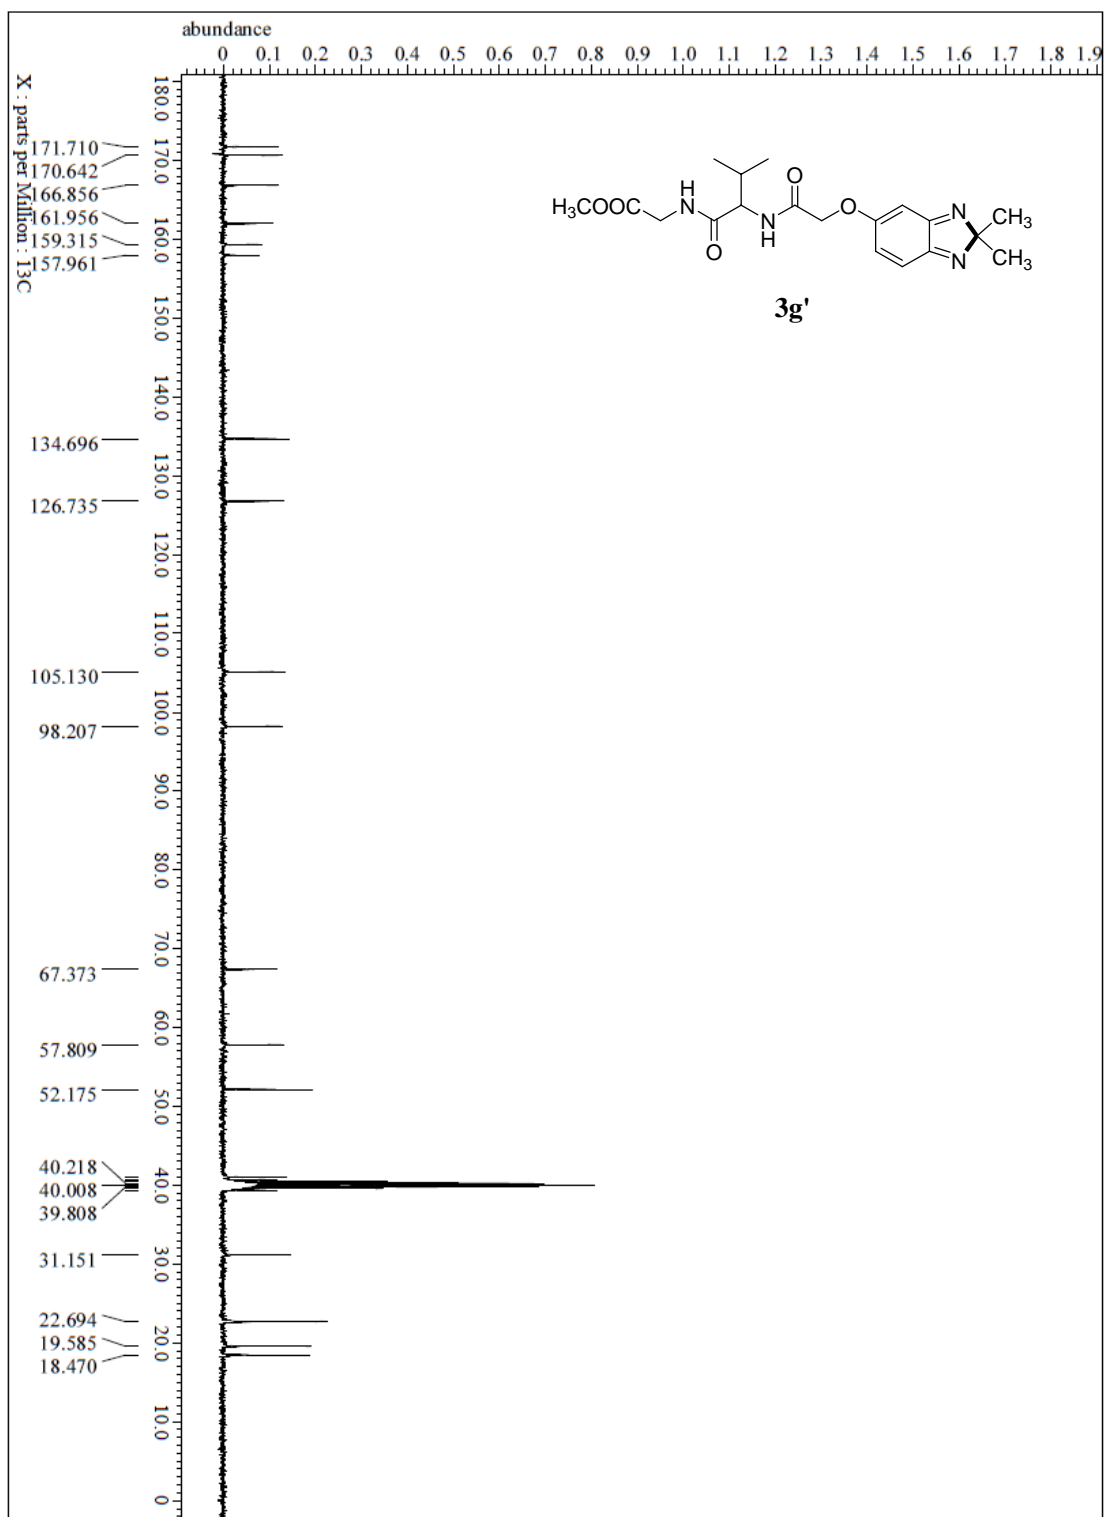

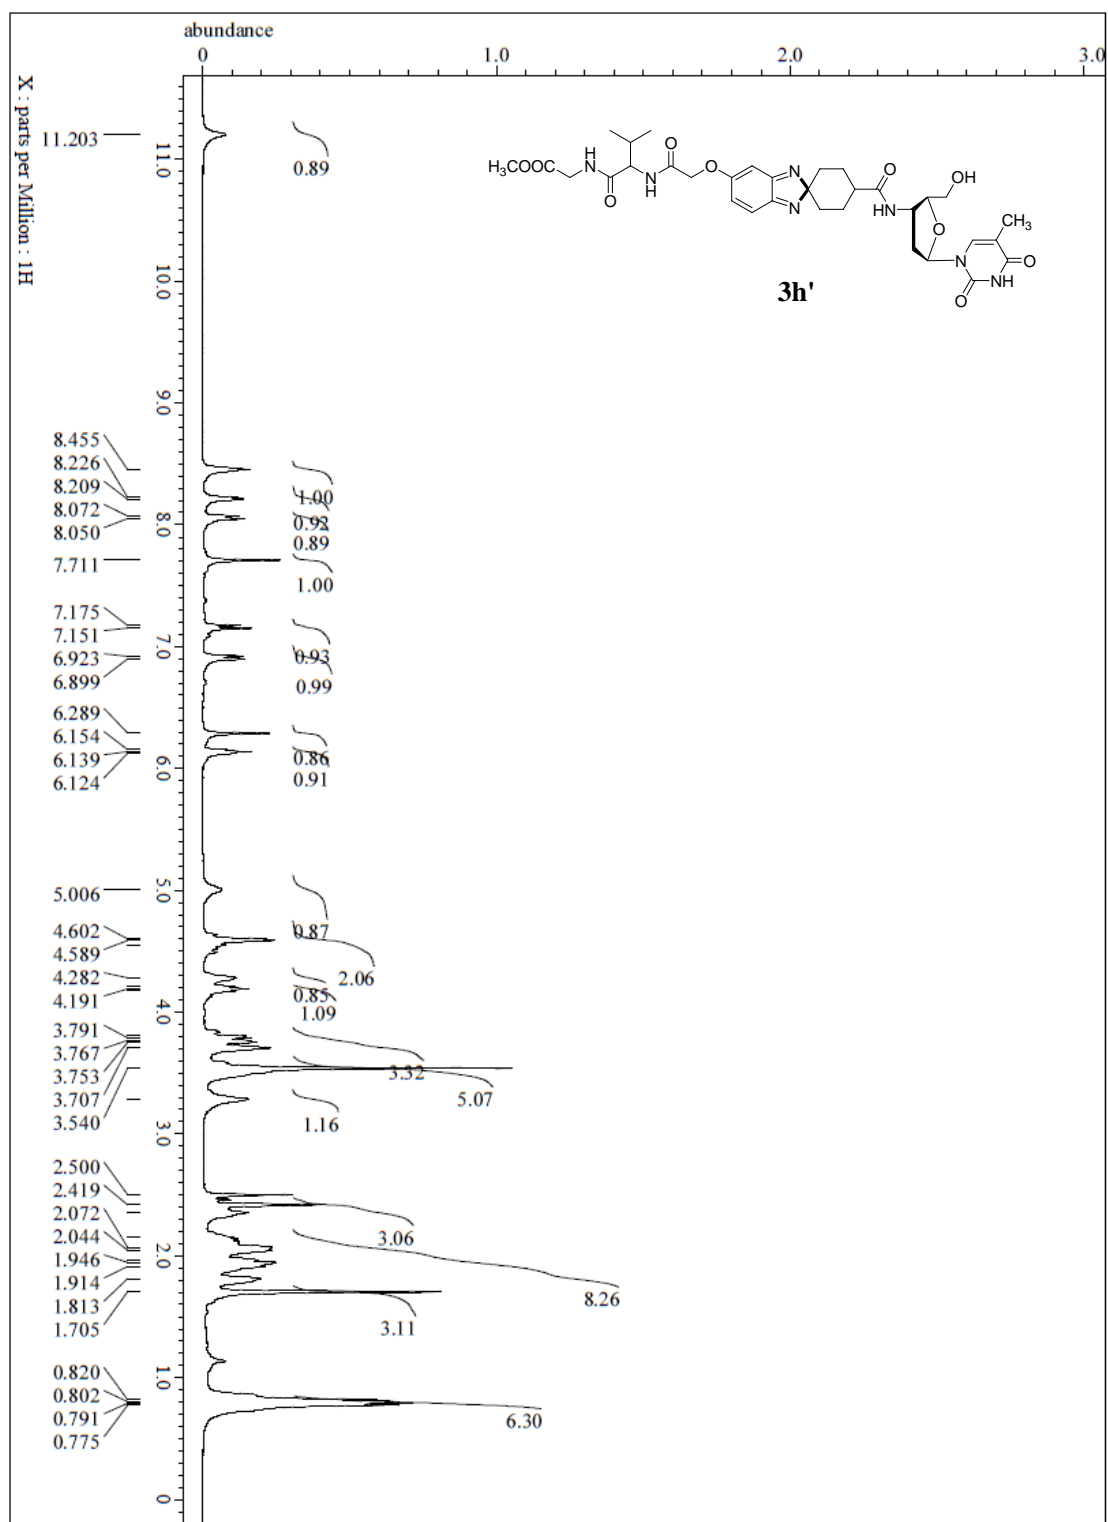

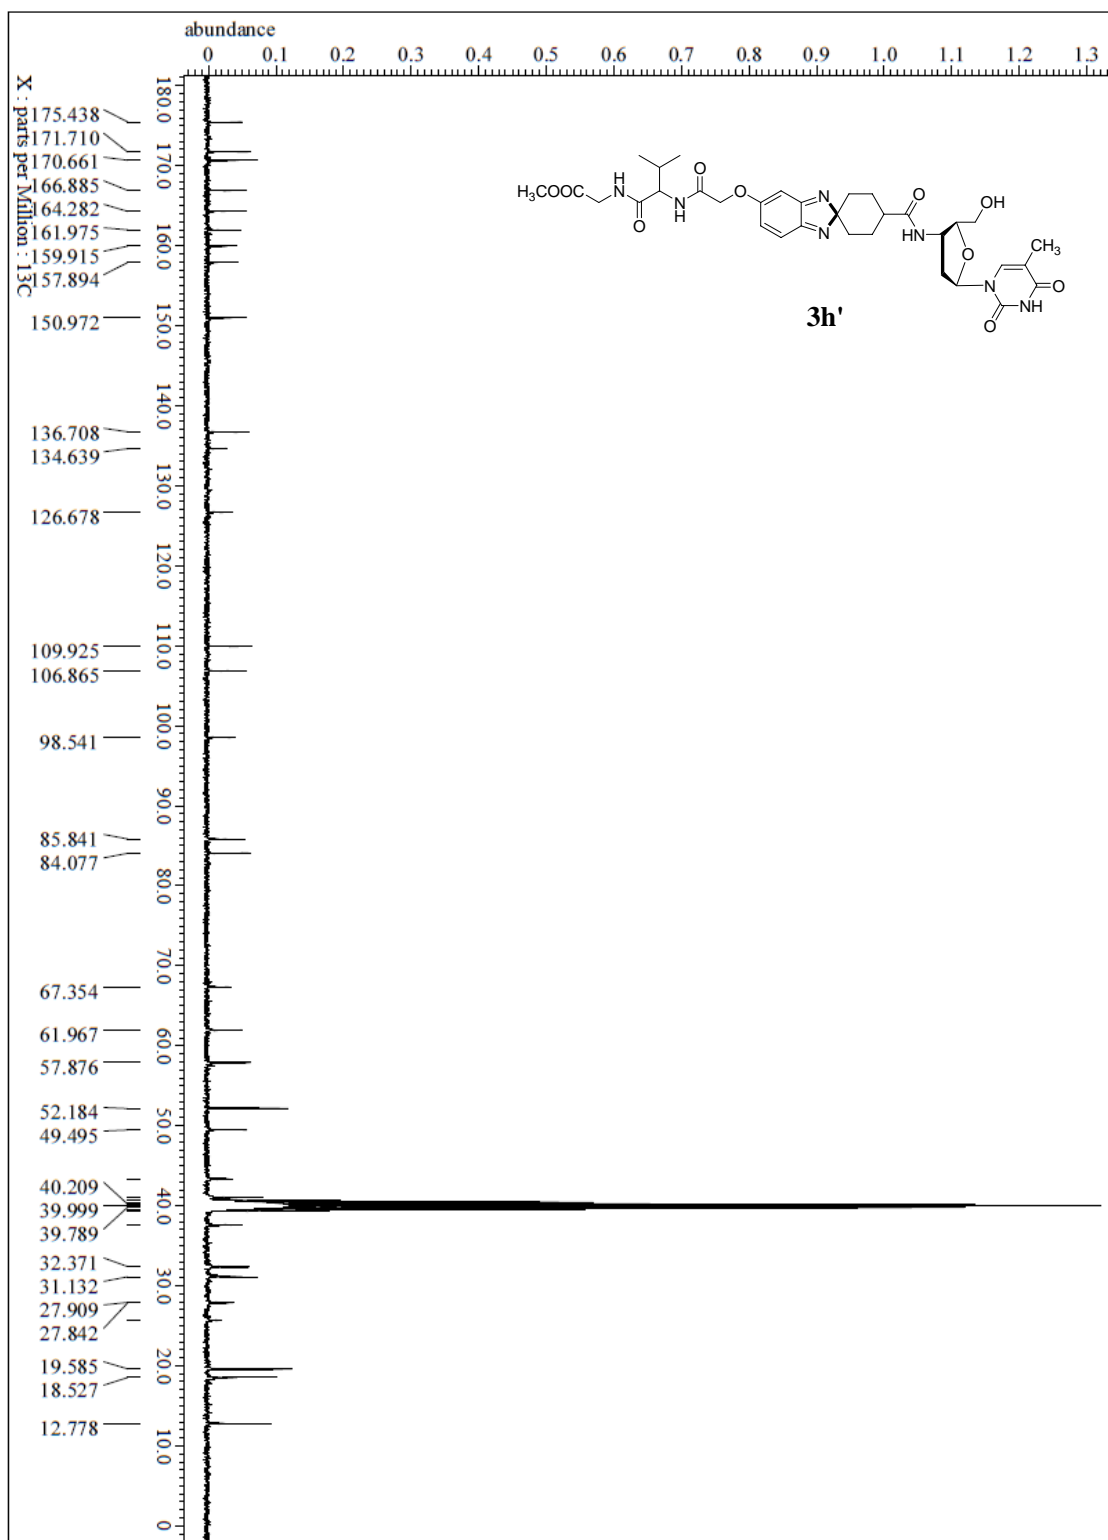

Supplement: c3gc41585f.pdf [file c3gc41585f.pdf]
